# Supplementary material for: An improved modified early warning score that incorporates the abdomen score for identifying multiple traumatic injury severity
Source: PeerJ. 2020 Oct 27;8:e10242. doi: 10.7717/peerj.10242 (PMC7597630; doi:10.7717/peerj.10242)
Supplement: Supplemental Information 1 [file peerj-08-10242-s001.xlsx]

## Sheet: Sheet1
Gender	Age	Cause	InjurySite	LOS	ICU_LOS	Time_of_transport	Mode_of_transport	Discharge_status	T	HR	RR	SBP	AVPU	Abdomen	AIS_head	AIS_face	AIS_neck	AIS_thorax	AIS_abdomen_and_pelvis	AIS_spine_C	AIS_spine_T	AIS_spine_L	AIS_upper_extremities	AIS_lower_extremities	AIS_surface	ISS_head_and_neck	ISS_face	ISS_thorax	ISS_abdomen_and_visceral_pelvis	ISS_bone_pelvis_and_bony_extremities	ISS_external_structures	ISS	Severity	Survival	MEWS	MEWS_A
0	35	0	2	1	1	0.5	1	0	37	171	15	90	0	0	5	1	0	0	0	0	0	0	0	0	0	5	1	0	0	0	0	26	1	1	5	5
1	25	3	2	28	3	4	2	1	37	113	20	143	0	0	3	1	1	1	0	0	0	0	0	0	0	3	1	1	0	0	0	11	0	0	3	3
0	29	3	3	7	0	1	1	1	37	110	21	133	0	1	0	0	1	3	0	0	0	0	0	0	0	1	0	3	0	0	0	10	0	0	3	4
1	36	0	3	7	0	6	3	3	37.2	84	20	125	0	1	0	1	0	4	0	0	0	0	0	0	0	0	1	4	0	0	0	17	1	0	1	2
0	49	1	4	14	0	2	1	3	36.8	88	20	134	1	0	0	0	0	0	0	0	0	4	0	0	1	0	0	0	4	0	1	17	1	0	2	2
0	57	1	2	19	0	2	1	1	36.9	84	25	125	0	0	0	0	0	0	0	4	0	2	0	0	0	4	0	0	2	0	0	20	1	0	2	2
0	30	0	5	14	4	2	1	1	36.8	88	19	123	0	0	0	0	0	0	0	0	0	0	0	3	1	0	0	0	0	3	1	10	0	0	1	1
0	70	5	5	12	0	48	2	3	36.7	76	20	168	0	0	2	0	0	0	0	0	0	0	3	0	0	2	0	0	0	3	0	13	0	0	1	1
0	28	0	2	61	0	0.5	1	3	37	91	15	147	3	0	5	1	0	0	0	0	0	0	0	0	0	5	1	0	0	0	0	26	1	0	4	4
0	47	2	3	9	0	2	1	1	36.8	98	20	126	0	2	0	0	0	3	0	0	2	2	0	2	0	0	0	3	2	2	0	17	1	0	1	3
0	39	1	3	9	0	2	1	1	36.7	88	18	138	0	1	0	0	0	3	0	0	0	0	0	2	0	0	0	3	0	2	0	13	0	0	1	2
0	50	0	5	9	0	0.5	1	1	37	86	20	140	0	0	0	0	0	0	0	0	0	0	3	0	1	0	0	0	0	3	1	10	0	0	1	1
0	87	0	2	15	0	7	1	3	37.7	67	20	169	0	0	4	1	0	0	0	0	0	0	0	0	0	4	1	0	0	0	0	17	1	0	1	1
0	78	0	1	7	0	1	1	3	36.8	89	20	150	0	0	2	3	0	0	0	0	0	0	0	0	0	2	3	0	0	0	0	13	0	0	1	1
0	51	0	2	6	0	1	1	3	36	89	17	150	0	0	4	1	0	0	0	0	0	0	0	0	0	4	1	0	0	0	0	17	1	0	1	1
0	40	1	2	12	0	1	1	3	36.5	79	20	134	0	2	4	0	0	3	0	0	3	2	0	0	0	4	0	3	2	0	0	29	1	0	1	3
0	38	0	2	14	0	1	1	3	37.2	80	21	125	0	2	4	0	0	3	0	0	0	2	0	0	0	4	0	3	2	0	0	29	1	0	2	4
1	47	5	4	5	0	2	1	3	37	76	20	105	0	0	0	0	0	0	2	0	0	3	0	3	0	0	0	0	3	3	0	18	1	0	1	1
0	42	0	2	11	0	2	1	3	36.7	90	20	149	0	1	4	1	0	0	2	0	0	0	0	2	0	4	1	0	2	2	0	24	1	0	1	2
0	43	0	2	40	0	1	1	3	37.2	82	18	115	2	1	5	1	0	2	0	0	0	2	2	0	0	5	1	2	2	2	0	33	1	0	3	4
1	28	0	5	0	0	1	1	2	36.7	90	20	120	0	0	0	0	0	0	0	0	0	0	0	3	1	0	0	0	0	3	1	10	0	0	1	1
0	49	0	2	12	0	1	1	3	37	80	16	154	0	0	3	1	0	0	0	0	0	2	0	0	1	3	1	0	2	0	1	14	0	0	1	1
1	40	0	5	73	4	0.5	1	2	36.8	153	19	143	3	0	3	2	2	2	2	0	0	0	0	4	1	3	2	2	2	4	1	29	1	0	7	7
0	40	0	2	0	0	1	1	0	35				3	0	5	0	0	0	0	0	0	0	0	3	0	5	0	0	0	3	0	34	1	1
0	32	0	5	8	3	2	1	1	36.5	86	20	137	0	0	0	0	0	0	0	0	0	0	0	3	1	0	0	0	0	3	1	10	0	0	1	1
0	52	0	5	65	0	1	1	3	36.8	76	20	132	0	0	0	0	0	0	0	0	0	0	0	3	1	0	0	0	0	3	1	10	0	0	1	1
0	26	5	2	10	0	1	1	1	37.2	80	20	137	0	0	3	3	0	0	0	0	0	0	0	0	0	3	3	0	0	0	0	18	1	0	1	1
0	48	6	5	23	0	2	1	1	36.8	88	20	182	0	0	0	0	0	0	0	0	0	0	3	0	1	0	0	0	0	3	1	10	0	0	1	1
1	30	0	3	0	0	1	2	1	36.5	88	21	154	0	1	0	0	0	3	0	0	0	0	1	1	0	0	0	3	0	1	0	10	0	0	2	3
0	51	0	3	46	0	3	1	1	37	68	20	101	0	1	0	0	0	3	3	0	0	0	3	0	0	0	0	3	3	3	0	27	1	0	1	2
0	34	0	5	12	0	3	1	1	36.8	88	20	148	0	0	0	0	0	0	0	0	0	0	0	3	1	0	0	0	0	3	1	10	0	0	1	1
1	85	5	3	5	0	3	1	1	36.8	79	20	236	0	2	0	0	0	4	1	0	0	0	0	0	0	0	0	4	1	0	0	17	1	0	3	5
0	48	1	3	36	32	1	1	3	36.7	78	15	95	0	2	0	0	0	4	2	0	2	2	0	0	0	0	0	4	2	0	0	20	1	0	2	4
0	46	1	4	7	0	0.5	1	1	37	76	20	130	0	0	0	0	0	0	0	0	0	3	0	2	0	0	0	0	3	2	0	13	0	0	1	1
0	38	0	5	8	0	1	1	3	37	108	20	142	0	0	0	0	0	0	0	0	0	0	3	2	1	0	0	0	0	3	1	10	0	0	2	2
1	30	0	5	43	0	1	1	1	36.8	85	19	151	0	0	1	0	0	0	0	0	0	0	0	3	0	1	0	0	0	3	0	10	0	0	1	1
0	23	0	2	7	0	2	1	3	36	66	17	144	1	0	4	1	0	0	0	0	0	0	0	0	0	4	1	0	0	0	0	17	1	0	2	2
0	45	0	4	31	0	1	1	1	36.7	109	15	187	0	2	0	0	0	3	4	0	0	0	0	3	0	0	0	3	4	3	0	34	1	0	2	4
0	28	1	3	46	0	3	1	1	36.8	97	20	106	0	1	0	0	0	3	3	0	0	3	0	3	0	0	0	3	3	3	0	27	1	0	1	2
1	52	0	3	4	0	2	2	3	36.8	78	20	168	0	0	0	0	0	0	0	0	3	0	0	0	1	0	0	3	0	0	1	10	0	0	1	1
0	22	0	2	14	0	3	1	3	37.7	84	21	155	1	0	4	3	0	0	0	0	0	0	0	0	0	4	3	0	0	0	0	25	1	0	3	3
1	88	5	5	0	0	2	1	2	37	90	18	134	0	0	0	0	0	2	0	0	0	0	0	3	0	0	0	2	0	3	0	13	0	0	1	1
0	65	6	5	23	0	2	1	1	36.5	71	20	189	0	0	0	0	0	0	0	0	0	0	0	3	1	0	0	0	0	3	1	10	0	0	1	1
0	42	5	2	7	0	1	1	3	37	76	20	125	0	0	3	2	0	0	0	0	0	0	0	0	0	3	2	0	0	0	0	13	0	0	1	1
1	59	5	4	6	0	1	2	1	37	60	20	138	0	0	0	0	0	0	0	0	0	3	0	0	1	0	0	0	3	0	1	10	0	0	1	1
0	60	0	5	14	0	2	1	1	37	61	20	183	0	0	0	0	0	0	0	0	0	0	0	3	1	0	0	0	0	3	1	10	0	0	1	1
0	58	5	5	10	0	2	1	1	37	90	20	116	0	0	0	0	0	0	0	0	0	0	0	3	1	0	0	0	0	3	1	10	0	0	1	1
0	42	0	3	21	0	2	1	1	36.7	89	15	105	0	2	0	1	0	4	3	0	2	2	2	2	0	0	1	4	3	2	0	29	1	0	1	3
0	41	5	5	18	0	2	1	1	37	84	20	143	0	0	0	0	0	0	0	0	0	0	0	3	1	0	0	0	0	3	1	10	0	0	1	1
0	70	0	2	0	0	0.5	1	0	37.7	122	35	184	3	2	5	0	0	3	0	0	0	0	2	0	0	5	0	3	0	2	0	38	1	1	8	10
0	37	1	5	2	0	2	1	3	37	89	20	146	0	0	0	0	0	0	0	0	0	2	0	3	0	0	0	0	2	3	0	13	0	0	1	1
0	42	2	5	12	12	3	1	3	36.7	100	15	72	0	0	0	0	0	0	3	0	0	0	0	4	0	0	0	0	3	4	0	25	1	0	3	3
1	45	0	2	19	0	1	1	3	36	100	17	202	2	1	4	2	0	2	0	0	0	0	2	0	0	4	2	2	0	2	0	24	1	0	5	6
1	69	5	5	0	0	1	1	4	37.2	96	18	151	0	0	0	0	0	0	0	0	0	0	0	3	1	0	0	0	0	3	1	10	0	0	1	1
0	45	0	2	3	0	2	1	1	37	80	20	155	0	0	3	0	0	0	0	0	0	0	0	0	1	3	0	0	0	0	1	10	0	0	1	1
1	48	0	2	3	0	2	1	1	37	87	16	176	0	0	3	1	0	0	0	0	0	0	0	0	0	3	1	0	0	0	0	10	0	0	1	1
0	54	0	3	12	0	2	1	1	37	113	20	124	0	2	0	0	0	3	3	0	0	0	2	0	0	0	0	3	3	2	0	22	1	0	3	5
0	64	5	1	0	0	1	1	2	36.8	105	18	97	0	0	1	3	0	0	0	0	0	0	0	0	0	1	3	0	0	0	0	10	0	0	3	3
0	53	5	3	0	0	2	1	2	37.2	78	18	165	0	0	0	1	0	1	0	0	0	0	0	0	1	0	1	1	0	0	1	3	0	0	1	1
0	29	0	5	9	0	3	1	1	36.8	84	19	154	0	0	0	1	0	0	0	0	0	0	0	3	0	0	1	0	0	3	0	10	0	0	1	1
0	60	0	3	0	0	1	1	0	36	113	31	86	3	2	3	0	0	4	0	0	0	0	0	3	0	3	0	4	0	3	0	34	1	1	9	11
0	58	0	5	12	0	2	1	1	36.5	85	20	160	0	0	0	0	1	0	0	0	0	0	0	3	0	1	0	0	0	3	0	10	0	0	1	1
0	55	5	2	0	0	2	3	2	36.5	124	21	122	1	0	4	2	0	0	0	0	0	0	0	0	0	4	2	0	0	0	0	20	1	0	5	5
0	55	5	3	59	16	2	1	1	37	101	18	139	2	2	3	0	0	4	3	0	0	0	2	0	0	3	0	4	3	2	0	34	1	0	4	6
0	48	0	2	30	0	2	1	3	36	95	17	148	3	0	5	0	0	0	0	0	0	0	0	3	1	5	0	0	0	3	1	35	1	0	4	4
0	39	1	3	7	0	2	1	1	37.3	90	20	166	0	2	0	0	0	3	0	0	0	0	0	0	1	0	0	3	0	0	1	10	0	0	1	3
0	60	6	3	0	0	2	1	2	37.3	98	21	158	0	1	0	0	0	3	0	0	0	0	0	0	1	0	0	3	0	0	1	10	0	0	2	3
0	82	5	2	12	0	3	1	3	36.7	57	19	158	0	0	4	1	0	0	0	0	0	0	0	0	0	4	1	0	0	0	0	17	1	0	1	1
0	24	2	3	43	0	2	1	1	37.2	96	20	165	0	2	0	0	0	4	0	0	0	0	0	0	1	0	0	4	0	0	1	17	1	0	1	3
1	49	0	2	43	0	0.5	1	3	37	53	15	133	3	0	5	0	0	0	0	0	0	0	0	2	0	5	0	0	0	2	0	29	1	0	4	4
0	58	0	2	29	0	2	1	1	36.8	98	19	135	0	0	3	0	0	0	0	0	0	0	0	3	0	3	0	0	0	3	0	18	1	0	1	1
1	31	0	4	22	0	2	1	1	36.8	102	20	154	0	0	0	0	0	0	0	0	0	3	0	3	0	0	0	0	3	3	0	18	1	0	2	2
0	56	0	2	22	0	4	1	3	37	68	19	157	0	0	4	2	0	0	0	0	0	0	0	0	0	4	2	0	0	0	0	20	1	0	1	1
0	50	0	5	0	0	1	1	2	37.2	86	18	161	0	1	0	2	1	0	0	0	0	0	0	3	0	1	2	0	0	3	0	14	0	0	1	2
0	32	0	5	17	0	2	1	1	36.8	80	20	93	0	0	0	0	0	0	0	0	0	0	0	3	1	0	0	0	0	3	1	10	0	0	2	2
0	66	0	4	10	0	2	2	1	36.8	98	20	188	0	0	0	0	0	0	0	0	0	3	0	1	0	0	0	0	3	1	0	10	0	0	1	1
0	55	0	5	690	0	1	1	1	37	105	21	90	0	0	0	0	0	0	0	0	0	0	0	3	1	0	0	0	0	3	1	10	0	0	4	4
0	60	0	5	15	0	2	2	1	36.8	90	19	126	0	0	0	0	0	0	0	0	0	0	0	3	1	0	0	0	0	3	1	10	0	0	1	1
1	39	0	4	12	0	3	1	1	36.8	69	20	111	0	1	0	0	0	2	3	0	0	0	0	0	0	0	0	2	3	0	0	13	0	0	1	2
0	55	1	5	8	0	1	2	3	36.8	74	20	168	0	0	0	0	0	0	0	0	0	0	0	3	1	0	0	0	0	3	1	10	0	0	1	1
0	40	1	4	24	0	4	1	1	37.1	78	20	130	0	2	0	0	0	0	3	0	0	0	0	2	0	0	0	0	3	2	0	13	0	0	1	3
1	61	1	3	10	0	3	1	1	36.8	80	20	163	0	2	1	0	0	3	0	0	0	0	0	2	0	1	0	3	0	2	0	14	0	0	1	3
0	62	1	3	15	0	2	1	1	36.8	76	20	173	0	2	1	0	0	3	0	0	0	0	0	0	0	1	0	3	0	0	0	10	0	0	1	3
0	41	5	5	10	0	2	1	1	37	89	20	92	0	0	0	0	0	0	0	0	0	0	0	3	1	0	0	0	0	3	1	10	0	0	2	2
0	59	0	2	38	0	2	1	3	36.5	111	17	125	2	1	4	2	0	4	0	2	2	0	2	0	0	4	2	4	0	2	0	36	1	0	5	6
1	86	5	4	12	0	3	1	1	36.5	68	20	145	0	0	0	0	0	0	0	0	0	3	0	0	1	0	0	0	3	0	1	10	0	0	1	1
1	55	5	5	15	0	2	1	1	37	80	20	173	0	0	1	0	0	0	0	0	0	0	0	3	0	1	0	0	0	3	0	10	0	0	1	1
0	25	0	3	41	0	7	1	1	36.8	126	20	102	2	2	3	0	0	4	0	0	0	0	0	0	0	3	0	4	0	0	0	25	1	0	5	7
0	32	1	5	23	0	2	1	3	36.8	88	19	144	0	0	0	2	0	0	0	0	0	2	0	3	0	0	2	0	2	3	0	17	1	0	1	1
0	34	0	3	23	0	1	1	1	37	112	22	136	3	2	2	0	0	3	3	0	0	0	2	0	0	2	0	3	3	2	0	22	1	0	7	9
1	50	0	2	33	0	1	1	1	37	99	21	91	1	0	5	2	0	3	0	0	0	0	0	3	0	5	2	3	0	3	0	43	1	0	4	4
0	39	5	3	12	0	2	1	1	36.8	61	20	121	0	1	0	0	0	3	0	0	0	2	0	0	0	0	0	3	2	0	0	13	0	0	1	2
0	58	0	4	16	0	72	3	1	36.8	76	20	142	0	2	0	0	0	0	4	0	0	2	0	0	0	0	0	0	4	0	0	16	1	0	1	3
0	60	0	2	18	0	1	1	1	37	80	17	145	0	0	4	2	0	0	0	0	0	0	0	0	0	4	2	0	0	0	0	20	1	0	1	1
0	65	0	2	4	0	1	1	1	36.8	95	18	150	0	1	3	1	0	1	0	0	0	0	0	0	1	3	1	1	0	0	1	11	0	0	1	2
1	27	0	2	20	0	2	1	1	36.8	92	19	126	0	0	3	0	0	0	0	0	0	0	0	3	0	3	0	0	0	3	0	18	1	0	1	1
0	81	0	2	0	0	4	1	4	36.8	79	18	196	0	0	4	1	0	0	0	0	0	0	0	0	0	4	1	0	0	0	0	17	1	0	1	1
0	64	5	4	6	0	24	1	1	36.8	78	20	121	0	0	0	0	0	0	0	0	0	3	0	0	1	0	0	0	3	0	1	10	0	0	1	1
0	27	0	2	7	0	3	1	1	37.2	105	21	107	0	0	4	1	0	0	0	0	0	0	0	0	0	4	1	0	0	0	0	17	1	0	3	3
1	52	3	2	32	0	1	0	1	36.6	88	20	112	0	0	2	2	0	0	0	0	0	0	2	0	0	2	2	0	0	2	0	12	0	0	1	1
1	28	3	5	32	0	1	1	1	36.6	105	20	107	0	0	2	0	0	0	0	0	0	0	3	0	0	2	0	0	0	3	0	13	0	0	2	2
1	60	5	4	7	0	2	2	1	36.8	76	20	107	0	0	0	0	0	0	0	0	0	3	0	0	1	0	0	0	3	0	1	10	0	0	1	1
1	59	5	5	19	0	2	1	1	36.8	88	20	126	0	0	0	0	0	0	0	0	0	0	0	3	1	0	0	0	0	3	1	10	0	0	1	1
1	59	0	5	18	0	2	1	1	36.8	87	20	149	0	0	2	0	0	0	0	0	0	0	0	3	0	2	0	0	0	3	0	13	0	0	1	1
1	28	0	3	3	0	3	2	1	36.5	88	20	102	0	0	0	1	2	3	0	0	0	0	0	2	0	2	1	3	0	2	0	17	1	0	1	1
0	29	0	5	13	0	2	1	1	36.8	85	19	147	0	0	0	0	0	0	0	0	0	0	0	3	1	0	0	0	0	3	1	10	0	0	1	1
0	48	0	5	24	0	2	1	1	36.8	94	19	147	0	0	0	0	0	0	2	0	0	0	0	4	1	0	0	0	2	4	1	21	1	0	1	1
1	86	5	5	16	0	3	1	1	36.8	88	20	141	0	0	0	0	0	0	0	0	0	0	0	3	1	0	0	0	0	3	1	10	0	0	1	1
0	56	0	3	13	0	10	1	1	36.4	91	20	116	0	2	0	0	0	4	4	0	0	0	0	0	0	0	0	4	4	0	0	32	1	0	1	3
0	41	1	5	25	0	1	1	1	36.5	58	20	106	0	0	0	0	0	0	0	0	0	0	0	4	0	0	0	0	0	4	0	16	1	0	1	1
1	89	5	5	14	0	2	1	1	36.8	76	19	132	0	0	0	0	0	0	0	0	0	0	0	3	1	0	0	0	0	3	1	10	0	0	1	1
0	71	0	2	30	0	12	1	3	37	98	15	146	0	0	4	1	0	0	0	0	0	0	0	0	0	4	1	0	0	0	0	17	1	0	1	1
0	46	0	3	40	0	2	1	1	37	92	20	131	0	2	0	0	0	4	3	0	0	0	2	0	0	0	0	4	3	2	0	29	1	0	1	3
1	47	0	5	21	0	2	1	1	36.8	88	20	120	0	0	0	0	0	0	0	0	0	0	0	3	1	0	0	0	0	3	1	10	0	0	1	1
0	40	0	2	4	0	3	1	3	37	62	15	129	0	0	4	2	0	0	0	0	0	0	0	0	0	4	2	0	0	0	0	20	1	0	1	1
1	53	1	3	32	0	6	1	1	37	69	20	125	0	2	0	0	0	3	0	0	2	2	2	3	0	0	0	3	2	3	0	22	1	0	1	3
1	48	0	2	27	0	2	1	3	36.5	111	18	147	0	0	4	1	0	0	0	0	0	0	0	0	0	4	1	0	0	0	0	17	1	0	3	3
1	87	0	5	16	3	2	1	1	37	90	20	172	0	0	0	0	0	0	0	0	0	0	0	3	1	0	0	0	0	3	1	10	0	0	1	1
0	64	0	5	20	0	2	1	1	36.8	74	19	149	0	0	0	0	0	0	0	0	0	0	2	3	1	0	0	0	0	3	1	10	0	0	1	1
0	40	0	3	29	0	2	1	1	36.8	85	20	121	0	2	0	0	0	4	0	0	0	0	2	2	0	0	0	4	0	2	0	20	1	0	1	3
0	60	0	3	0	0	1	1	1	37	86	21	127	0	2	0	0	0	4	0	0	0	0	2	0	0	0	0	4	0	2	0	20	1	0	2	4
0	30	0	5	20	0	1	1	1	37	82	20	99	0	0	0	0	0	0	0	0	0	0	0	3	1	0	0	0	0	3	1	10	0	0	2	2
0	21	3	5	5	0	2	1	1	37	105	20	169	0	0	0	0	0	0	0	0	0	0	0	3	1	0	0	0	0	3	1	10	0	0	2	2
0	43	3	3	7	0	4	1	1	37.2	100	20	130	0	0	0	0	0	3	1	0	0	0	2	0	0	0	0	3	1	2	0	14	0	0	1	1
1	63	0	3	15	0	4	1	1	37.2	75	20	135	0	2	0	0	0	3	1	0	0	0	0	0	0	0	0	3	1	0	0	10	0	0	1	3
0	35	2	5	19	0	2	1	1	36.8	76	20	146	0	0	0	0	0	0	0	0	0	0	0	3	2	0	0	0	0	3	2	13	0	0	1	1
0	60	0	2	32	0	2	1	1	37.2	78	18	178	1	0	4	0	0	0	0	0	0	0	0	2	1	4	0	0	0	2	1	21	1	0	2	2
0	44	6	2	14	0	9	1	1	37	65	20	90	0	2	0	0	4	3	0	0	0	0	0	0	0	4	0	3	0	0	0	25	1	0	2	4
1	73	5	5	0	0	2	1	2	36.5	78	16	145	0	0	0	1	0	0	0	0	0	0	1	0	0	0	1	0	0	1	0	2	0	0	1	1
1	79	5	4	11	0	2	1	1	37	80	20	179	0	0	0	0	0	0	0	0	0	3	0	0	1	0	0	0	3	0	1	10	0	0	1	1
0	43	0	3	15	0	2	1	1	37	71	20	115	0	1	0	0	0	3	2	0	0	0	0	0	0	0	0	3	2	0	0	13	0	0	1	2
0	58	0	4	0	0	1	1	1	36.8	85	18	140	0	1	0	1	0	0	0	0	0	2	0	1	0	0	1	0	2	1	0	6	0	0	1	2
0	54	0	5	23	0	2	1	1	36.5	75	20	138	0	0	0	0	0	0	0	0	0	0	0	3	1	0	0	0	0	3	1	10	0	0	1	1
0	56	6	5	21	0	2	1	1	36.8	99	20	130	0	0	0	0	0	0	0	0	0	0	0	3	1	0	0	0	0	3	1	10	0	0	1	1
0	80	5	5	0	0	2	1	1	37	88	16	120	1	0	0	0	0	0	0	0	0	0	0	3	1	0	0	0	0	3	1	10	0	0	2	2
0	44	3	3	13	0	1	1	1	36.8	91	24	105	0	2	0	0	0	4	0	0	0	0	0	0	1	0	0	4	0	0	1	17	1	0	2	4
1	74	0	5	9	0	2	1	1	36.8	96	20	162	0	0	0	0	0	0	0	0	0	0	3	0	1	0	0	0	0	3	1	10	0	0	1	1
0	30	0	5	12	0	2	1	1	36.8	91	19	161	0	0	0	0	0	0	0	0	0	0	0	3	1	0	0	0	0	3	1	10	0	0	1	1
1	76	5	3	0	0	2	1	2	37	62	16	144	0	0	0	0	0	0	0	0	2	2	2	2	0	0	0	2	2	2	0	12	0	0	1	1
0	30	5	3	13	0	2	1	1	36.8	86	20	145	0	1	0	0	0	3	0	2	0	0	2	0	0	2	0	3	0	2	0	17	1	0	1	2
0	63	0	4	0	0	2	1	1	36.8	78	20	138	0	0	0	0	0	0	0	0	0	2	1	0	0	0	0	0	2	1	0	5	0	0	1	1
1	49	0	5	18	0	3	1	1	37	69	20	141	0	0	0	0	0	0	0	0	0	0	0	3	1	0	0	0	0	3	1	10	0	0	1	1
0	70	5	5	19	0	2	1	1	36.8	66	20	144	0	0	1	0	0	0	0	0	0	0	0	3	1	1	0	0	0	3	1	11	0	0	1	1
0	46	2	3	0	0	1	2	0	35				3	2	4	0	0	5	5	0	0	0	0	0	0	4	0	5	5	0	0	66	1	1
0	44	0	2	16	0	72	1	3	37	80	16	116	0	0	4	0	0	0	0	0	0	0	0	0	1	4	0	0	0	0	1	17	1	0	1	1
0	51	0	2	36	0	1	1	3	36.5	95	18	120	2	0	5	1	0	0	0	0	0	0	0	0	0	5	1	0	0	0	0	26	1	0	3	3
0	48	0	4	0	0	2	1	4	37.2	105	21	138	0	0	1	0	0	0	3	0	0	0	0	3	0	1	0	0	3	3	0	19	1	0	3	3
0	48	0	2	14	0	1	1	3	37.2	78	20	118	1	0	5	2	0	0	0	0	0	0	0	0	0	5	2	0	0	0	0	29	1	0	2	2
0	67	6	3	0	0	1	2	0	35				3	2	3	0	1	5	3	0	0	0	0	0	0	3	0	5	3	0	0	43	1	1
1	40	0	5	9	0	0.5	1	1	37	72	20	146	0	1	0	1	0	1	0	0	0	0	3	1	0	0	1	1	0	3	0	11	0	0	1	2
0	19	5	2	4	0	1	1	3	37	80	20	128	0	0	4	1	0	0	0	0	0	0	0	0	0	4	1	0	0	0	0	17	1	0	1	1
0	49	5	4	12	0	4	1	1	36.9	73	20	142	0	1	0	0	0	1	3	0	0	0	0	0	0	0	0	1	3	0	0	10	0	0	1	2
1	56	5	5	8	0	2	1	3	36.8	89	19	145	0	0	0	0	0	0	0	0	0	0	0	3	1	0	0	0	0	3	1	10	0	0	1	1
0	66	0	2	9	0	2	1	3	36	78	17	144	2	0	4	1	0	0	0	0	0	0	0	0	0	4	1	0	0	0	0	17	1	0	3	3
1	58	5	3	9	0	4	1	1	36.5	68	20	137	0	0	0	0	0	0	0	0	2	0	0	0	1	0	0	2	0	0	1	5	0	0	1	1
1	80	0	3	9	0	6	1	3	37	64	20	161	0	0	0	2	0	0	0	0	2	2	0	2	0	0	2	2	2	2	0	12	0	0	1	1
0	56	1	2	9	0	1	1	3	37.2	83	20	177	0	0	3	2	0	3	0	0	0	0	0	0	0	3	2	3	0	0	0	22	1	0	1	1
0	38	0	3	7	0	4	1	1	37	115	20	118	0	1	0	0	0	3	1	0	0	0	0	0	0	0	0	3	1	0	0	10	0	0	3	4
0	49	2	3	0	0	3	1	2	37	78	21	112	0	2	0	0	0	3	1	0	3	2	0	0	0	0	0	3	2	0	0	13	0	0	2	4
1	46	0	5	9	0	2	1	1	36.8	112	20	138	0	0	0	0	0	0	0	0	0	0	0	3	1	0	0	0	0	3	1	10	0	0	3	3
0	65	0	5	0	0	1	1	3	37.3	103	20	147	0	0	0	0	0	0	0	0	0	0	0	3	1	0	0	0	0	3	1	10	0	0	2	2
1	50	0	3	6	0	4	1	3	37.2	98	20	134	0	2	3	1	0	4	0	0	0	0	0	0	0	3	1	4	0	0	0	26	1	0	1	3
1	48	0	2	26	0	0.5	1	3	36.4	87	18	178	3	2	5	0	0	3	0	0	0	0	0	3	0	5	0	3	0	3	0	43	1	0	4	6
0	38	3	5	0	0	1	1	4	36.8	68	21	141	0	0	0	0	0	0	0	0	0	0	0	3	1	0	0	0	0	3	1	10	0	0	2	2
0	48	1	4	12	0	4	1	1	36.8	77	20	112	0	2	0	0	0	3	4	0	0	2	0	0	0	0	0	3	4	0	0	25	1	0	1	3
0	45	1	5	26	0	2	1	1	36.8	76	20	156	0	0	0	1	0	0	0	0	0	0	3	2	1	0	1	0	0	3	1	11	0	0	1	1
0	32	1	3	6	0	2	1	1	36.8	87	20	148	0	0	0	0	0	0	0	0	3	3	0	0	0	0	0	3	3	0	0	18	1	0	1	1
0	35	0	2	12	0	24	3	3	37	78	21	154	0	0	4	1	0	0	0	0	0	0	0	0	0	4	1	0	0	0	0	17	1	0	2	2
0	63	0	2	23	0	2	1	3	36.4	78	20	155	0	0	4	1	0	0	0	0	0	0	0	0	0	4	1	0	0	0	0	17	1	0	1	1
0	61	0	2	10	0	24	1	3	37	80	17	145	0	0	4	1	0	0	0	0	0	0	0	0	0	4	1	0	0	0	0	17	1	0	1	1
1	72	0	2	51	0	0.5	1	3	37	83	15	178	3	0	5	1	0	0	0	0	0	0	0	0	0	5	1	0	0	0	0	26	1	0	4	4
0	16	0	3	80	0	4	1	1	37.2	161	19	108	0	1	3	0	0	4	0	0	0	0	2	4	0	3	0	4	0	4	0	41	1	0	4	5
1	86	1	2	0	0	1	1	0	36.5	60	21	66	3	1	3	0	0	2	0	0	0	2	0	3	0	3	0	2	2	3	0	22	1	1	8	9
1	69	0	3	19	0	2	1	1	36.5	86	20	157	0	0	0	0	0	3	0	0	0	0	0	2	0	0	0	3	0	2	0	13	0	0	1	1
1	96	5	5	0	0	3	1	1	36.8	64	18	149	0	0	0	0	0	0	0	0	0	0	0	3	1	0	0	0	0	3	1	10	0	0	1	1
0	46	2	5	2	0	2	1	3	36.8	77	20	107	0	0	0	0	0	0	0	0	0	0	2	3	1	0	0	0	0	3	1	10	0	0	1	1
1	63	0	3	16	0	4	1	1	37.2	58	20	147	0	1	0	0	0	3	0	0	0	0	0	2	0	0	0	3	0	2	0	13	0	0	1	2
1	48	0	3	6	0	2	1	1	37	85	20	140	0	1	1	0	0	3	0	0	0	0	0	0	0	1	0	3	0	0	0	10	0	0	1	2
0	48	0	2	8	0	17	1	3	37	96	16	125	0	0	4	1	0	0	0	0	0	0	0	0	0	4	1	0	0	0	0	17	1	0	1	1
1	32	0	5	9	0	2	1	1	37	78	20	104	0	0	0	0	0	0	0	0	0	0	0	3	1	0	0	0	0	3	1	10	0	0	1	1
0	80	5	5	14	0	3	1	1	36.8	76	20	137	0	0	0	0	0	0	0	0	0	0	0	3	1	0	0	0	0	3	1	10	0	0	1	1
0	50	5	2	12	0	1	1	3	37	68	15	195	2	0	4	0	0	0	0	0	0	0	1	1	0	4	0	0	0	1	0	17	1	0	3	3
0	40	0	4	10	0	1	1	1	37	74	20	135	0	2	0	0	0	1	3	0	0	0	0	0	0	0	0	1	3	0	0	10	0	0	1	3
0	46	1	2	21	5	4	1	1	37.8	81	12	116	0	0	3	0	0	0	0	0	3	0	2	0	0	3	0	3	0	2	0	22	1	0	0	0
0	40	0	2	19	6	8	1	3	37	91	17	138	0	1	4	1	0	0	0	0	0	0	0	0	0	4	1	0	0	0	0	17	1	0	1	2
1	40	0	3	18	0	3	1	1	37	89	20	136	0	2	1	1	0	3	0	0	0	0	0	0	0	1	1	3	0	0	0	11	0	0	1	3
0	56	1	2	20	0	3	1	1	36.5	65	18	161	0	1	4	1	0	3	0	0	0	2	0	2	0	4	1	3	2	2	0	29	1	0	1	2
0	33	6	3	13	0	4	1	1	36.7	112	20	116	0	2	0	0	0	3	3	0	2	3	0	3	0	0	0	3	3	3	0	27	1	0	3	5
0	30	0	2	2	0	1	1	0	36.5	58	17	107	3	1	5	0	0	1	0	0	0	0	2	0	0	5	0	1	0	2	0	30	1	1	4	5
1	45	0	2	13	0	1	1	1	36.7	48	22	149	3	0	0	0	0	0	0	4	0	0	0	2	0	4	0	0	0	2	0	20	1	0	6	6
0	64	0	2	40	0	1	1	2	36.6	90	22	155	3	2	5	0	0	3	2	0	0	0	0	0	0	5	0	3	2	0	0	38	1	0	5	7
0	25	1	3	0	0	1	1	0	35				3	0	3	1	0	5	0	0	0	0	0	0	0	3	1	5	0	0	0	35	1	1
0	52	1	4	0	0	1	1	4	36.8	98	18	136	0	0	0	0	0	0	0	0	2	3	0	3	0	0	0	2	3	3	0	22	1	0	1	1
1	75	0	5	17	0	2	1	1	37	70	20	142	0	0	0	0	0	0	0	0	0	0	0	3	1	0	0	0	0	3	1	10	0	0	1	1
0	47	0	3	48	0	3	1	1	37	80	20	108	0	2	0	0	0	3	0	0	0	0	0	3	1	0	0	3	0	3	1	19	1	0	1	3
0	38	0	5	12	0	2	1	1	37	80	20	119	0	0	0	0	0	0	0	0	0	0	0	3	1	0	0	0	0	3	1	10	0	0	1	1
0	47	5	2	21	0	2	3	1	36.8	114	20	152	1	1	3	0	0	3	0	0	0	0	0	0	1	3	0	3	0	0	1	19	1	0	4	5
0	45	0	3	0	0	2	1	4	37	74	20	128	0	1	0	0	0	4	0	0	0	0	2	0	0	0	0	4	0	2	0	20	1	0	1	2
0	28	0	2	13	0	2	1	3	37	98	16	114	0	0	4	0	0	0	0	0	0	0	0	0	1	4	0	0	0	0	1	17	1	0	1	1
0	54	5	3	5	0	3	1	2	36.7	82	18	170	0	2	0	0	0	3	1	0	0	0	0	0	0	0	0	3	1	0	0	10	0	0	1	3
0	52	1	5	7	0	2	1	3	37.4	92	20	138	0	0	0	0	0	0	0	0	0	0	2	3	1	0	0	0	0	3	1	10	0	0	1	1
0	71	3	4	11	0	2	1	1	37	100	16	130	0	2	1	0	0	0	3	0	0	0	0	0	0	1	0	0	3	0	0	10	0	0	1	3
0	54	1	3	2	0	2	1	3	37.3	74	20	185	0	2	0	0	0	4	0	0	0	0	2	0	0	0	0	4	0	2	0	20	1	0	1	3
1	68	5	4	7	0	2	1	1	36.8	76	20	169	0	0	0	0	0	0	0	0	0	3	0	0	1	0	0	0	3	0	1	10	0	0	1	1
1	86	5	5	17	0	2	2	3	36.5	69	20	165	0	0	0	0	0	0	0	0	0	0	0	3	1	0	0	0	0	3	1	10	0	0	1	1
0	67	0	2	10	0	1	1	3	37.4	81	20	119	0	0	3	2	0	0	0	5	0	0	0	0	0	5	2	0	0	0	0	29	1	0	1	1
0	27	0	3	8	0	1	1	3	37	84	15	109	0	0	2	2	0	3	0	0	0	0	0	0	0	2	2	3	0	0	0	17	1	0	1	1
0	85	5	2	9	0	0.5	1	3	37	80	15	175	0	0	3	1	0	0	0	2	0	0	0	0	0	3	1	0	0	0	0	10	0	0	1	1
0	52	0	2	13	0	1	1	1	37	67	20	151	0	0	0	0	0	0	0	2	0	0	0	2	0	2	0	0	0	2	0	8	0	0	1	1
1	51	0	5	44	6	3	1	1	36.5	70	20	90	0	0	0	0	0	0	0	0	0	0	0	4	3	0	0	0	0	4	3	25	1	0	2	2
0	50	0	2	6	0	1	1	0	37	89	15	110	3	2	5	0	0	0	3	0	0	0	0	0	0	5	0	0	3	0	0	34	1	1	4	6
0	43	1	5	24	0	2	1	1	36.8	75	20	116	0	1	0	0	0	0	0	0	0	0	3	0	1	0	0	0	0	3	1	10	0	0	1	2
1	35	0	5	0	0	2	1	4	36.2	98	18	123	0	0	0	0	0	0	0	0	0	0	3	0	1	0	0	0	0	3	1	10	0	0	1	1
0	59	0	2	13	0	1	1	1	37.2	75	20	134	0	0	3	2	0	0	0	0	0	0	0	0	0	3	2	0	0	0	0	13	0	0	1	1
1	88	5	5	38	0	2	1	1	37	84	20	123	0	0	0	0	0	0	0	0	0	0	0	3	1	0	0	0	0	3	1	10	0	0	1	1
1	38	5	5	6	0	2	1	1	37	90	20	176	0	0	0	0	0	0	0	0	0	0	3	0	1	0	0	0	0	3	1	10	0	0	1	1
0	50	6	2	13	0	24	1	3	37.2	71	20	138	1	1	4	1	0	1	0	0	0	0	0	0	0	4	1	1	0	0	0	18	1	0	2	3
0	72	0	2	6	0	1	1	0	36	81	17	164	3	0	5	1	0	0	0	0	0	0	0	0	0	5	1	0	0	0	0	26	1	1	4	4
1	94	5	5	13	0	2	1	1	37	80	20	180	0	0	0	0	0	0	0	0	0	0	0	3	1	0	0	0	0	3	1	10	0	0	1	1
1	65	6	5	6	0	3	1	1	36.8	76	20	140	0	0	0	0	0	0	0	0	0	0	3	0	1	0	0	0	0	3	1	10	0	0	1	1
0	35	1	5	3	0	2	1	3	37	90	20	137	0	0	0	0	0	0	0	0	0	0	0	3	1	0	0	0	0	3	1	10	0	0	1	1
0	39	1	3	6	0	3	1	3	36.5	92	20	143	0	1	0	0	0	3	0	0	0	0	2	2	1	0	0	3	0	2	1	14	0	0	1	2
1	40	1	4	12	0	1	1	3	36.8	80	20	111	0	0	0	0	0	0	0	0	0	3	0	0	1	0	0	0	3	0	1	10	0	0	1	1
1	48	0	2	15	0	4	1	3	36	81	20	107	1	0	4	2	0	0	0	0	0	0	0	0	0	4	2	0	0	0	0	20	1	0	2	2
0	60	0	3	0	0	1	1	2	37	89	16	126	0	1	0	0	0	3	0	0	0	2	2	0	0	0	0	3	2	2	0	17	1	0	1	2
0	26	6	3	5	0	4	1	1	36.7	65	20	124	0	1	0	0	0	3	0	0	0	0	0	0	1	0	0	3	0	0	1	10	0	0	1	2
1	32	5	2	9	0	2	1	1	37	60	20	117	0	0	3	0	0	0	0	0	0	0	2	0	0	3	0	0	0	2	0	13	0	0	1	1
1	54	0	2	0	0	6	1	3	37	80	20	127	0	0	3	1	0	0	0	0	0	0	0	0	0	3	1	0	0	0	0	10	0	0	1	1
0	67	6	3	14	0	2	1	1	36.8	75	20	153	0	1	0	0	0	3	0	0	0	0	0	2	1	0	0	3	0	2	1	14	0	0	1	2
0	85	5	2	0	0	1	1	0	36	88	28	127	3	0	3	0	0	0	0	0	0	3	0	0	0	3	0	0	3	0	0	18	1	1	5	5
0	88	5	1	0	0	2	1	2	37.2	60	16	202	0	0	0	3	0	0	0	0	0	0	1	0	0	0	3	0	0	1	0	10	0	0	3	3
1	24	0	2	10	0	48	1	3	37.4	103	20	122	0	0	3	2	0	0	0	0	0	0	2	3	0	3	2	0	0	3	0	22	1	0	2	2
1	55	1	3	7	0	2	1	3	37.2	70	20	131	0	1	0	0	0	3	0	0	0	2	0	0	0	0	0	3	2	0	0	13	0	0	1	2
0	42	0	4	5	0	4	1	3	36.5	88	20	116	0	0	0	0	0	0	0	0	0	3	2	0	0	0	0	0	3	2	0	13	0	0	1	1
1	71	0	3	17	0	4	1	3	37.2	75	20	189	0	2	1	2	0	3	0	0	0	0	0	0	0	1	2	3	0	0	0	14	0	0	1	3
0	26	0	4	26	0	1	1	1	37	120	20	90	0	2	0	0	0	0	4	0	0	0	0	0	1	0	0	0	4	0	1	17	1	0	4	6
0	50	0	5	20	0	2	1	1	37	72	20	105	0	0	0	0	0	0	0	0	0	0	0	3	1	0	0	0	0	3	1	10	0	0	1	1
0	53	0	5	19	0	2	1	1	36.7	80	17	99	0	0	0	0	0	0	0	0	0	0	0	3	1	0	0	0	0	3	1	10	0	0	2	2
0	35	2	3	0	0	1	1	0	36	159	30	149	3	2	3	0	2	5	0	2	2	0	2	0	0	3	0	5	0	2	0	38	1	1	9	11
0	50	0	5	12	0	2	1	1	37	90	15	169	0	0	0	0	0	0	0	0	0	0	0	3	1	0	0	0	0	3	1	10	0	0	1	1
0	29	1	4	27	0	2	1	1	37	104	15	153	0	0	0	0	0	0	0	0	0	3	0	0	1	0	0	0	3	0	1	10	0	0	2	2
0	30	1	3	11	0	2	1	1	37	82	15	116	0	0	0	2	0	0	0	0	3	0	2	0	0	0	2	3	0	2	0	17	1	0	1	1
0	40	6	2	0	0	2	1	4	36.2	69	18	108	0	0	3	1	0	0	0	0	0	0	2	0	0	3	1	0	0	2	0	14	0	0	1	1
0	49	0	5	13	0	2	1	1	37	75	20	101	0	0	0	0	0	0	0	0	0	0	0	3	1	0	0	0	0	3	1	10	0	0	1	1
0	52	1	3	16	0	24	1	1	37	84	14	152	0	0	0	0	0	0	0	0	3	3	0	0	0	0	0	3	3	0	0	18	1	0	0	0
0	66	6	3	27	0	4	1	1	37	80	20	119	0	2	0	1	0	3	0	0	0	0	2	0	0	0	1	3	0	2	0	14	0	0	1	3
0	47	1	4	25	0	1	1	1	37	83	13	126	0	0	0	0	0	0	2	0	0	3	0	3	0	0	0	0	3	3	0	18	1	0	0	0
0	44	2	4	12	0	1	1	1	36	105	20	60	1	1	0	0	0	0	4	0	0	0	0	0	1	0	0	0	4	0	1	17	1	0	6	7
1	16	1	3	44	44	5	1	3	36	163	30	123	2	2	2	2	0	4	0	2	0	0	0	2	1	2	2	4	0	2	1	24	1	0	8	10
1	24	0	4	13	0	4	1	1	36.8	89	20	130	0	2	0	0	0	0	4	0	0	0	0	0	1	0	0	0	4	0	1	17	1	0	1	3
0	41	2	4	16	0	1	1	1	36	102	34	106	0	2	0	0	0	0	3	0	0	0	0	0	1	0	0	0	3	0	1	10	0	0	4	6
0	25	1	2	33	0	1	1	1	37	86	20	115	0	0	4	2	0	0	0	0	0	0	0	3	0	4	2	0	0	3	0	29	1	0	1	1
0	38	1	2	1	0	1	3	2	36.5	79	18	142	3	0	5	1	0	0	0	0	0	0	0	0	0	5	1	0	0	0	0	26	1	0	4	4
0	32	0	4	11	0	2	1	1	36.5	117	20	104	0	2	0	0	0	3	4	0	0	0	0	0	0	0	0	3	4	0	0	25	1	0	3	5
0	38	0	2	35	0	12	1	3	37	68	20	132	2	0	4	1	0	0	0	0	0	0	0	0	0	4	1	0	0	0	0	17	1	0	3	3
0	45	0	2	112	0	2	1	3	37	75	20	157	1	2	4	2	0	3	0	0	0	0	0	0	0	4	2	3	0	0	0	29	1	0	2	4
1	79	0	2	3	0	3	1	0	36.4	76	26	211	3	0	4	1	1	0	0	0	0	0	0	0	0	4	1	0	0	0	0	17	1	1	7	7
0	45	0	5	5	0	3	1	1	37	85	15	148	0	0	0	0	0	0	0	0	0	0	2	3	1	0	0	0	0	3	1	10	0	0	1	1
1	52	0	2	8	0	10	1	3	37.1	98	20	175	0	0	3	1	0	0	0	0	0	0	0	0	0	3	1	0	0	0	0	10	0	0	1	1
0	40	1	5	22	0	2	1	1	37.6	80	20	130	0	0	0	0	0	0	0	0	0	0	0	3	1	0	0	0	0	3	1	10	0	0	1	1
1	34	5	5	8	0	2	1	1	36.7	72	18	127	0	0	0	0	0	0	0	0	0	0	3	0	1	0	0	0	0	3	1	10	0	0	1	1
1	68	5	3	5	0	5	1	1	37	65	14	124	0	0	0	0	0	0	0	0	3	0	0	0	1	0	0	3	0	0	1	10	0	0	0	0
1	56	1	3	15	0	1	1	1	37	78	13	131	0	0	0	0	0	0	0	0	3	0	0	0	1	0	0	3	0	0	1	10	0	0	0	0
0	47	1	2	8	0	1	1	3	37	75	15	110	0	0	4	0	0	0	0	0	0	2	0	0	0	4	0	0	2	0	0	20	1	0	1	1
0	48	0	2	11	0	1	1	3	37	75	15	110	0	0	3	1	0	0	0	0	0	0	0	0	0	3	1	0	0	0	0	10	0	0	1	1
1	57	5	3	5	0	2	1	1	37	75	20	130	0	0	0	0	0	0	0	0	3	2	0	0	0	0	0	3	2	0	0	13	0	0	1	1
0	48	5	3	10	0	1	1	1	37	88	21	140	0	1	1	0	0	3	0	0	0	0	0	0	1	1	0	3	0	0	1	11	0	0	2	3
0	38	0	3	10	0	0.5	1	1	36.5	76	18	120	0	2	0	0	0	3	2	0	0	0	0	0	0	0	0	3	2	0	0	13	0	0	1	3
1	57	5	5	7	0	12	1	1	37	80	15	120	0	0	0	0	0	0	0	0	0	0	3	0	1	0	0	0	0	3	1	10	0	0	1	1
0	52	0	3	27	0	4	1	1	37	72	21	170	0	2	0	0	0	4	0	0	0	0	0	2	0	0	0	4	0	2	0	20	1	0	2	4
0	23	5	3	14	0	4	1	1	37	78	21	120	0	2	0	0	0	4	0	0	0	0	0	0	1	0	0	4	0	0	1	17	1	0	2	4
1	49	0	3	17	0	1	1	1	38.1	88	20	147	0	2	0	0	0	3	0	0	0	0	2	0	0	0	0	3	0	2	0	13	0	0	1	3
0	26	0	4	32	0	2	1	1	37	79	21	115	0	2	0	0	0	0	4	0	0	0	0	0	1	0	0	0	4	0	1	17	1	0	2	4
0	66	0	2	10	0	22	1	0	38.1	88	20	147	0	0	4	0	0	0	0	0	2	0	2	1	0	4	0	2	0	2	0	24	1	1	1	1
0	56	1	4	47	5	0.5	1	1	37	83	21	74	0	2	0	0	0	0	4	0	0	0	0	3	0	0	0	0	4	3	0	25	1	0	4	6
0	57	0	5	1	0	1	1	2	36.8	114	20	124	0	1	1	1	0	2	0	2	0	2	3	2	0	2	1	2	2	3	0	17	1	0	3	4
0	39	0	2	18	0	1	1	3	36.8	88	20	166	0	0	4	1	0	0	0	0	0	0	0	0	0	4	1	0	0	0	0	17	1	0	1	1
0	51	2	4	55	0	2	1	1	36.5	103	17	80	0	1	0	0	0	0	3	0	0	0	0	3	0	0	0	0	3	3	0	18	1	0	4	5
0	69	5	3	8	0	72	1	1	37	78	21	140	0	2	0	0	0	4	0	0	0	0	0	0	1	0	0	4	0	0	1	17	1	0	2	4
0	31	0	5	21	4	4	1	1	37	109	15	92	0	0	0	0	0	0	0	0	0	0	0	4	1	0	0	0	0	4	1	17	1	0	3	3
1	31	0	3	0	0	1	2	0	35				3	0	4	0	0	5	0	0	0	0	0	0	0	4	0	5	0	0	0	41	1	1
0	37	0	2	0	0	1	1	0	35	155	35	173	2	0	5	2	0	0	0	0	0	0	0	0	0	5	2	0	0	0	0	29	1	1	8	8
0	39	0	4	19	0	5	1	1	36.5	74	20	138	0	2	1	0	0	1	4	0	0	0	1	0	0	1	0	1	4	1	0	18	1	0	1	3
1	48	0	3	45	0	2	1	1	37	80	18	130	0	1	0	0	1	3	0	0	2	0	0	0	0	1	0	3	0	0	0	10	0	0	1	2
0	29	0	3	25	0	1	1	1	36.8	80	20	115	0	2	0	0	0	3	3	0	2	2	0	0	0	0	0	3	3	0	0	18	1	0	1	3
0	52	0	4	67	0	3	1	1	37	75	21	132	0	2	0	0	0	1	4	0	0	0	0	0	0	0	0	1	4	0	0	17	1	0	2	4
0	59	5	3	0	0	2	1	2	36.8	89	18	128	0	1	0	0	0	3	1	0	0	0	0	0	0	0	0	3	1	0	0	10	0	0	1	2
0	29	0	1	12	0	1	1	1	37	83	20	107	0	0	2	3	0	0	0	0	0	0	0	0	0	2	3	0	0	0	0	13	0	0	1	1
0	31	0	2	10	0	1	1	1	36.2	57	18	101	0	0	3	2	0	0	0	0	0	0	0	0	0	3	2	0	0	0	0	13	0	0	1	1
0	46	5	3	13	0	2	1	1	37	88	21	130	0	2	0	0	1	4	0	0	0	0	0	0	0	1	0	4	0	0	0	17	1	0	2	4
1	45	0	3	11	0	3	1	1	36.7	85	20	135	0	2	0	0	0	4	0	0	0	0	0	0	1	0	0	4	0	0	1	17	1	0	1	3
1	38	3	1	13	0	3	1	1	37	100	20	107	0	0	2	3	0	0	0	0	0	0	0	0	0	2	3	0	0	0	0	13	0	0	1	1
1	82	0	3	87	0	4	1	1	36.5	130	20	90	1	2	0	0	0	5	0	0	0	0	0	2	0	0	0	5	0	2	0	29	1	0	6	8
0	29	0	3	14	0	5	1	1	37	78	20	120	0	2	1	0	0	4	0	0	0	0	2	2	0	1	0	4	0	2	0	21	1	0	1	3
0	55	0	2	3	0	1	1	2	36.6	95	20	107	3	0	5	1	0	0	0	0	0	0	0	0	0	5	1	0	0	0	0	26	1	0	4	4
1	30	0	2	0	0	2	3	2	36.5	82	18	123	0	0	3	2	0	0	0	0	0	0	0	0	0	3	2	0	0	0	0	13	0	0	1	1
0	49	0	2	1	0	1	3	2	37.2	82	18	123	1	0	4	1	0	0	0	0	0	0	0	0	0	4	1	0	0	0	0	17	1	0	2	2
0	69	0	4	14	0	36	1	1	37	87	20	146	0	2	0	0	0	0	4	0	0	0	0	0	0	0	0	0	4	0	0	16	1	0	1	3
0	81	0	2	2	0	2	1	2	36.5	111	14	174	3	0	5	1	0	0	0	0	0	0	0	0	0	5	1	0	0	0	0	26	1	0	5	5
0	56	0	4	13	0	3	1	1	36.8	119	18	90	0	2	0	0	0	0	4	0	0	0	0	0	1	0	0	0	4	0	1	17	1	0	4	6
1	44	0	2	39	0	168	1	1	37	80	20	128	0	1	4	2	0	4	2	0	0	0	0	0	0	4	2	4	2	0	0	36	1	0	1	2
0	59	1	3	21	0	2	1	1	37	88	21	140	0	2	4	0	0	5	0	2	2	0	0	0	0	4	0	5	0	0	0	41	1	0	2	4
0	50	0	2	35	0	1	1	3	37.2	106	16	157	1	1	4	0	0	3	0	0	0	0	2	0	1	4	0	3	0	2	1	29	1	0	3	4
0	61	1	3	24	0	3	1	1	37	75	22	117	0	2	0	0	0	3	3	0	0	0	0	0	0	0	0	3	3	0	0	18	1	0	2	4
1	89	5	3	0	0	2	1	2	36.2	85	16	187	1	0	2	0	0	3	0	0	0	0	0	2	0	2	0	3	0	2	0	17	1	0	2	2
0	50	0	2	34	0	1	1	3	37.2	88	16	135	1	0	4	0	0	3	0	0	0	0	2	0	1	4	0	3	0	2	1	29	1	0	2	2
0	25	0	2	22	0	2	1	3	36.7	80	20	140	0	0	4	1	0	0	0	0	0	0	0	0	0	4	1	0	0	0	0	17	1	0	1	1
0	45	5	3	10	0	3	1	1	37	88	21	140	0	2	0	1	0	3	0	0	0	0	0	0	0	0	1	3	0	0	0	10	0	0	2	4
0	65	5	3	9	0	3	1	1	37	88	21	140	0	1	1	0	0	3	0	0	0	0	0	0	0	1	0	3	0	0	0	10	0	0	2	3
0	69	0	2	19	0	4	1	1	37	88	21	140	0	1	4	2	0	3	0	0	0	0	0	0	0	4	2	3	0	0	0	29	1	0	2	3
1	42	3	4	1	0	3	3	0	37	140	20	156	1	2	0	0	0	0	5	0	0	0	0	0	1	0	0	0	5	0	1	26	1	1	5	7
1	19	1	4	21	0	1	1	1	36.8	72	18	127	0	0	0	0	0	0	0	0	0	3	0	3	0	0	0	0	3	3	0	18	1	0	1	1
1	57	0	5	18	0	1	1	1	36.7	80	20	120	0	0	0	0	0	0	0	0	0	0	0	4	1	0	0	0	0	4	1	17	1	0	1	1
0	49	6	3	12	0	3	1	1	37	90	20	120	0	1	0	1	0	4	0	0	0	0	0	0	0	0	1	4	0	0	0	17	1	0	1	2
0	71	5	2	23	0	2	1	1	36.8	72	18	140	0	0	0	0	0	0	0	4	0	0	2	0	0	4	0	0	0	2	0	20	1	0	1	1
0	47	3	4	16	0	3	1	1	36.9	78	18	140	0	2	0	0	0	0	3	0	0	0	0	0	1	0	0	0	3	0	1	10	0	0	1	3
1	46	3	4	16	0	6	3	1	37	85	20	120	0	2	0	0	0	0	4	0	0	0	0	0	1	0	0	0	4	0	1	17	1	0	1	3
0	54	0	3	13	0	3	1	1	37	88	21	140	0	2	0	0	0	3	0	0	0	0	2	0	0	0	0	3	0	2	0	13	0	0	2	4
1	74	0	2	1	0	0.5	1	0	37	76	15	201	2	0	5	1	0	0	0	0	0	0	0	0	0	5	1	0	0	0	0	26	1	1	5	5
0	50	1	4	87	0	6	1	1	36.8	65	13	120	0	2	0	0	0	0	4	0	0	0	2	0	0	0	0	0	4	2	0	20	1	0	0	2
0	54	0	2	32	0	4	1	3	36.8	89	20	154	1	0	4	1	0	0	0	0	0	0	0	0	1	4	1	0	0	0	1	18	1	0	2	2
0	58	1	3	13	0	4	1	1	37	78	20	120	0	2	0	0	0	4	0	0	0	0	2	0	0	0	0	4	0	2	0	20	1	0	1	3
0	47	6	2	44	0	2	1	3	38.2	98	26	165	2	1	5	2	0	3	0	0	0	0	0	0	0	5	2	3	0	0	0	38	1	0	4	5
0	67	1	3	12	0	5	1	1	37	78	20	120	0	2	3	0	0	4	0	0	0	2	2	1	0	3	0	4	2	2	0	29	1	0	1	3
1	48	0	5	56	0	2	1	1	36.7	72	18	127	0	0	0	0	0	0	0	0	0	0	0	3	2	0	0	0	0	3	2	13	0	0	1	1
1	46	0	3	43	30	4	1	1	37	100	20	113	0	1	0	0	0	3	3	0	0	2	0	3	0	0	0	3	3	3	0	27	1	0	1	2
0	48	1	2	21	0	24	1	1	36.8	72	18	140	0	0	0	0	1	0	0	4	0	0	0	0	1	4	0	0	0	0	1	17	1	0	1	1
1	63	0	2	9	0	1	1	0	37.4	84	20	103	1	0	5	1	0	0	0	0	0	0	0	0	0	5	1	0	0	0	0	26	1	1	2	2
0	60	6	3	11	0	10	1	1	37	85	20	130	0	1	0	0	0	3	0	0	2	0	3	0	0	0	0	3	0	3	0	18	1	0	1	2
0	55	0	2	37	0	0.5	1	1	37	75	15	120	1	0	4	0	0	0	0	0	0	0	0	3	0	4	0	0	0	3	0	25	1	0	2	2
0	52	1	3	12	0	15	1	1	37	88	21	140	0	2	0	0	0	4	0	0	0	0	0	0	1	0	0	4	0	0	1	17	1	0	2	4
0	51	0	2	38	0	1	1	3	37	75	15	130	2	1	4	1	0	0	0	0	0	0	0	0	0	4	1	0	0	0	0	17	1	0	3	4
1	91	5	2	22	0	1	1	3	36.9	97	20	224	3	1	4	1	0	0	0	0	0	0	0	0	0	4	1	0	0	0	0	17	1	0	6	7
0	44	1	3	22	0	2	1	1	37	88	21	140	0	1	0	0	0	3	0	0	0	0	0	0	1	0	0	3	0	0	1	10	0	0	2	3
0	55	0	3	23	0	3	1	1	37	88	21	140	0	2	0	0	0	4	0	0	0	0	0	0	1	0	0	4	0	0	1	17	1	0	2	4
1	52	0	3	14	0	5	1	1	37	80	20	120	0	2	0	0	0	4	1	0	0	0	0	0	0	0	0	4	1	0	0	17	1	0	1	3
1	67	0	2	22	0	1	1	3	37.5	80	20	160	1	0	4	1	0	0	0	0	0	0	0	2	0	4	1	0	0	2	0	21	1	0	2	2
0	66	5	2	33	0	5	1	3	37.8	78	20	179	2	0	4	1	0	0	0	0	0	0	0	0	0	4	1	0	0	0	0	17	1	0	3	3
0	45	1	2	23	0	2	1	1	37.8	60	16	121	0	1	4	2	1	1	0	0	0	0	2	0	1	4	2	1	0	2	1	24	1	0	1	2
1	68	0	2	13	0	3	1	3	37	72	20	185	1	0	3	0	1	0	0	0	0	0	0	0	1	3	0	0	0	0	1	10	0	0	2	2
0	45	1	2	23	0	1	1	1	36.5	61	22	143	0	1	4	2	1	1	0	0	0	0	2	0	1	4	2	1	0	2	1	24	1	0	2	3
0	25	1	4	3	0	1	1	3	36.7	85	20	118	0	2	0	0	0	0	3	0	0	0	0	2	0	0	0	0	3	2	0	13	0	0	1	3
0	57	0	3	10	0	3	1	1	37	88	21	140	0	2	0	0	0	4	0	0	0	0	0	0	1	0	0	4	0	0	1	17	1	0	2	4
0	64	0	2	1	0	0.5	1	0	37	66	15	88	3	2	5	2	0	4	0	0	2	0	0	2	0	5	2	4	0	2	0	45	1	1	5	7
1	60	0	3	38	5	2	1	1	36.8	100	20	110	0	2	3	0	0	4	3	0	0	0	2	0	0	3	0	4	3	2	0	34	1	0	1	3
0	60	0	2	0	0	4	1	0	39.2	55	25	204	2	0	5	0	0	4	0	0	0	0	0	0	0	5	0	4	0	0	0	41	1	1	8	8
0	42	1	2	20	0	24	1	1	36.8	78	18	130	0	0	1	0	0	0	0	4	0	0	0	0	1	4	0	0	0	0	1	17	1	0	1	1
1	79	5	2	15	0	1	1	3	36.5	82	21	120	1	0	4	2	0	0	0	0	0	0	0	0	0	4	2	0	0	0	0	20	1	0	3	3
1	29	0	2	2	0	1	1	0	37	144	33	145	3	2	5	0	0	4	0	0	0	0	0	2	0	5	0	4	0	2	0	45	1	1	9	11
0	58	1	3	11	0	5	1	1	37	78	21	160	0	2	0	1	0	3	0	0	0	0	0	0	0	0	1	3	0	0	0	10	0	0	2	4
0	19	6	5	20	3	12	1	1	38.4	83	16	130	0	0	0	0	0	0	0	0	0	0	2	4	1	0	0	0	0	4	1	17	1	0	1	1
0	46	1	3	10	0	2	1	1	37	78	21	120	0	1	0	0	0	3	0	0	0	0	2	0	0	0	0	3	0	2	0	13	0	0	2	3
0	54	5	3	13	0	2	1	1	37	88	21	140	0	1	0	0	0	4	0	0	0	0	2	0	0	0	0	4	0	2	0	20	1	0	2	3
0	51	5	2	8	0	12	1	3	37	75	20	135	0	0	3	1	0	0	0	0	0	0	0	0	0	3	1	0	0	0	0	10	0	0	1	1
1	40	0	2	2	0	1	1	0	37	144	28	145	3	2	5	0	0	4	0	0	0	0	0	2	0	5	0	4	0	2	0	45	1	1	8	10
0	66	0	3	10	0	6	1	3	37	88	21	140	0	2	0	2	0	3	3	0	0	0	0	0	0	0	2	3	3	0	0	22	1	0	2	4
0	42	1	2	13	0	2	1	1	36.8	78	18	130	0	0	1	0	0	0	0	4	0	0	0	0	0	4	0	0	0	0	0	16	1	0	1	1
0	47	0	3	12	0	3	1	1	37	88	21	140	0	2	0	0	0	4	0	0	0	0	0	0	1	0	0	4	0	0	1	17	1	0	2	4
1	78	0	3	0	0	1	1	0	35	70			3	0	3	0	0	5	0	0	0	0	0	0	0	3	0	5	0	0	0	34	1	1
0	48	0	3	10	0	14	1	1	37	88	21	130	0	2	0	0	0	3	0	0	0	0	0	2	0	0	0	3	0	2	0	13	0	0	2	4
0	45	0	2	74	0	1	1	3	37	133	28	111	3	0	5	1	0	0	0	0	0	0	0	0	0	5	1	0	0	0	0	26	1	0	8	8
0	55	1	5	107	0	1	1	1	37	75	20	138	0	0	0	0	0	0	0	0	0	0	0	4	1	0	0	0	0	4	1	17	1	0	1	1
0	48	0	3	15	0	5	1	1	37	88	21	140	0	2	0	0	0	4	0	0	0	0	0	0	1	0	0	4	0	0	1	17	1	0	2	4
0	58	6	3	14	0	1	1	1	37	88	23	90	0	2	0	2	0	5	0	0	0	0	2	2	0	0	2	5	0	2	0	33	1	0	3	5
0	55	2	3	28	0	1	1	1	37	88	21	120	0	2	0	0	0	4	0	0	0	0	2	0	0	0	0	4	0	2	0	20	1	0	2	4
0	74	1	3	15	0	24	1	1	37	88	21	140	0	2	0	0	0	4	0	0	0	0	2	0	0	0	0	4	0	2	0	20	1	0	2	4
0	60	0	3	16	0	6	1	1	37	78	21	120	0	2	0	2	0	4	0	0	0	0	0	0	0	0	2	4	0	0	0	20	1	0	2	4
0	58	0	3	21	0	1	1	1	36.5	77	19	123	0	2	2	0	0	4	0	0	0	0	0	2	0	2	0	4	0	2	0	24	1	0	1	3
1	54	0	2	1	0	3	1	0	36	124	24	90	3	2	5	0	0	4	0	0	0	0	0	0	0	5	0	4	0	0	0	41	1	1	8	10
0	36	0	4	15	0	96	1	1	37	72	18	110	0	2	0	0	0	0	4	0	0	0	1	0	0	0	0	0	4	1	0	17	1	0	1	3
0	23	0	2	6	0	1	1	3	37.2	88	15	107	0	0	3	1	0	0	0	0	0	0	0	1	0	3	1	0	0	1	0	11	0	0	1	1
0	61	0	3	18	0	4	1	1	37	80	21	130	0	2	0	1	0	4	0	0	0	0	0	0	0	0	1	4	0	0	0	17	1	0	2	4
0	48	1	2	52	0	1	1	3	37	85	20	190	1	0	5	2	0	0	0	2	0	0	0	0	0	5	2	0	0	0	0	29	1	0	2	2
0	52	0	2	28	0	4	1	1	37.2	96	18	130	0	1	4	2	0	3	2	0	0	0	2	0	1	4	2	3	2	2	1	29	1	0	1	2
1	57	5	3	18	0	48	1	1	36.7	85	20	135	0	1	0	0	0	3	1	0	0	0	0	0	0	0	0	3	1	0	0	10	0	0	1	2
0	27	0	2	1	0	1	1	0	37.2	125	27	95	3	2	5	0	0	3	0	0	2	0	2	0	1	5	0	3	0	2	1	38	1	1	8	10
1	49	0	5	56	0	2	1	1	37	110	30	80	1	0	0	0	0	0	2	0	0	0	0	5	1	0	0	0	2	5	1	30	1	0	7	7
0	34	1	2	1	0	1	1	0	37	80	12	200	3	2	5	0	0	4	0	0	0	0	2	0	1	5	0	4	0	2	1	45	1	1	5	7
0	48	0	2	18	0	2	1	3	36.5	78	20	117	0	0	4	2	0	0	0	2	0	0	2	0	0	4	2	0	0	2	0	24	1	0	1	1
0	62	2	3	0	0	1	1	0	35.2	115	21	61	1	2	0	2	0	4	4	0	0	0	0	0	0	0	2	4	4	0	0	36	1	1	8	10
1	73	0	3	0	0	1	1	2	36.8	85	16	151	1	2	0	0	0	4	0	0	0	0	2	0	0	0	0	4	0	2	0	20	1	0	2	4
0	45	1	2	39	0	2	3	3	37	74	20	164	0	0	4	0	0	0	0	0	0	2	0	0	0	4	0	0	2	0	0	20	1	0	1	1
1	63	5	3	21	0	120	1	1	36.7	85	20	135	0	1	0	0	0	3	0	0	0	0	0	0	1	0	0	3	0	0	1	10	0	0	1	2
0	25	0	2	20	0	2	1	3	36.5	66	20	158	1	0	4	2	0	0	0	0	0	0	0	0	0	4	2	0	0	0	0	20	1	0	2	2
0	48	0	3	11	0	3	1	1	37	88	21	140	0	2	0	0	0	4	0	0	0	0	1	0	0	0	0	4	0	1	0	17	1	0	2	4
0	39	0	5	10	0	2	1	1	37	81	15	132	0	0	0	1	0	0	0	0	2	0	0	3	0	0	1	2	0	3	0	14	0	0	1	1
0	51	6	5	103	0	2	1	1	37	102	19	105	0	0	0	0	0	0	0	0	0	0	2	3	1	0	0	0	0	3	1	10	0	0	2	2
0	43	0	4	6	6	3	1	0	37	140	20	140	0	2	0	0	0	0	5	0	0	0	0	0	1	0	0	0	5	0	1	26	1	1	4	6
1	60	5	3	9	0	7	3	1	36.7	70	20	135	0	2	0	0	0	3	3	0	0	0	0	0	0	0	0	3	3	0	0	18	1	0	1	3
0	29	0	2	22	0	3	1	3	38.2	67	20	148	0	0	4	2	0	0	0	0	0	0	0	0	0	4	2	0	0	0	0	20	1	0	1	1
1	74	5	2	2	0	2	1	0	36.5	76	18	166	3	1	4	2	0	3	0	0	0	0	0	3	1	4	2	3	0	3	1	34	1	1	4	5
0	53	1	3	22	0	2	1	1	37.4	73	16	93	0	2	1	0	0	3	3	0	0	0	2	0	0	1	0	3	3	2	0	22	1	0	2	4
0	22	0	4	17	0	3	1	3	36.7	58	18	91	0	1	0	0	0	0	3	0	0	0	1	0	0	0	0	0	3	1	0	10	0	0	2	3
1	70	5	3	13	0	4	1	1	37	88	21	130	0	1	0	0	0	4	0	0	0	0	0	0	1	0	0	4	0	0	1	17	1	0	2	3
0	42	0	2	67	67	4	3	3	38.5	160	20	112	3	2	5	1	0	3	0	0	0	2	2	2	0	5	1	3	2	2	0	38	1	0	9	11
1	70	5	5	18	0	3	1	1	36.7	72	18	127	0	0	0	0	0	0	0	0	0	0	2	4	1	0	0	0	0	4	1	17	1	0	1	1
0	48	0	2	16	0	2	1	3	37.1	58	20	156	1	0	4	1	0	0	0	0	0	0	0	0	0	4	1	0	0	0	0	17	1	0	2	2
0	49	1	2	8	0	3	1	0	36.8	88	15	88	2	2	5	0	0	3	0	0	0	2	0	0	0	5	0	3	2	0	0	38	1	1	4	6
0	65	1	2	6	13	2	1	0	36.8	68	25	154	1	0	3	2	0	3	0	5	0	0	0	0	0	5	2	3	0	0	0	38	1	1	3	3
1	36	0	2	17	0	0.5	1	3	37	50	15	108	2	0	4	0	0	0	0	0	0	0	2	0	0	4	0	0	0	2	0	20	1	0	4	4
1	43	0	4	12	0	2	1	1	36.8	120	20	130	0	2	0	0	0	0	4	0	0	0	0	0	1	0	0	0	4	0	1	17	1	0	3	5
1	59	0	3	12	0	48	1	1	36.8	120	20	130	0	2	0	0	0	3	3	0	0	2	0	0	0	0	0	3	3	0	0	18	1	0	3	5
0	22	0	3	9	0	4	1	1	37	88	21	140	0	2	0	0	0	4	0	0	0	0	0	0	1	0	0	4	0	0	1	17	1	0	2	4
0	45	0	2	11	0	2	1	3	36.5	124	20	119	0	0	4	2	0	2	0	0	2	0	0	0	0	4	2	2	0	0	0	24	1	0	3	3
0	39	1	3	21	0	2	1	1	37	80	15	98	0	0	0	0	0	3	0	0	2	2	2	3	0	0	0	3	2	3	0	22	1	0	2	2
0	45	0	2	11	0	1	1	2	36.8	84	24	124	3	1	5	0	0	3	0	0	2	0	0	0	1	5	0	3	0	0	1	35	1	0	5	6
0	40	0	4	17	0	3	1	1	36.7	90	20	120	0	2	0	0	0	1	4	0	0	0	0	0	0	0	0	1	4	0	0	17	1	0	1	3
0	50	0	2	2	0	1	3	0	36.2	56	28	139	2	0	5	1	0	0	0	0	0	0	0	0	0	5	1	0	0	0	0	26	1	1	4	4
1	85	0	2	0	0	3	3	2	36.2	80	16	191	1	0	4	1	0	0	0	0	0	0	0	0	0	4	1	0	0	0	0	17	1	0	2	2
1	50	0	3	0	0	1	1	0	35				3	2	4	0	0	5	0	0	0	0	0	0	0	4	0	5	0	0	0	41	1	1
1	95	4	6	8	0	1	1	0	37	98	20	188	0	0	1	0	0	0	0	0	0	0	0	0	3	1	0	0	0	0	3	10	0	1	1	1
0	28	0	2	13	0	2	1	3	37	80	16	131	0	0	4	0	0	0	0	0	0	0	0	0	1	4	0	0	0	0	1	17	1	0	1	1
1	48	0	5	0	0	1	3	0	36	115	22	71	1	0	1	0	0	0	0	0	0	2	0	4	1	1	0	0	2	4	1	21	1	1	7	7
0	35	2	2	0	0	0.5	2	0	36.9	143	12	78	3	0	3	0	0	0	0	6	0	0	3	0	0	6	0	0	0	3	0	75	1	1	8	8
0	50	1	2	0	0	0.5	1	0	35				3	0	3	1	5	0	0	0	0	0	0	0	0	5	1	0	0	0	0	26	1	1
0	80	0	2	21	0	2	1	1	36	96	25	117	2	1	3	0	0	3	0	0	0	0	0	0	0	3	0	3	0	0	0	18	1	0	4	5
0	57	2	5	11	11	5	1	0	36.2	50	21	100	0	0	0	0	0	0	3	0	0	0	0	4	0	0	0	0	3	4	0	25	1	1	4	4
0	50	0	3	15	0	2	1	1	37.2	85	20	110	0	2	1	0	0	4	0	0	0	0	0	0	0	1	0	4	0	0	0	17	1	0	1	3
0	32	0	2	1	0	2	1	0	36.5	88	23	182	1	0	4	2	0	0	0	0	0	0	0	0	0	4	2	0	0	0	0	20	1	1	3	3
0	24	2	5	1	0	2	2	4	36.2	98	21	100	0	0	0	0	0	0	0	0	0	0	0	4	0	0	0	0	0	4	0	16	1	0	3	3
1	30	3	5	0	0	2	1	4	36.8	83	24	162	0	0	0	0	0	0	0	0	0	0	0	3	1	0	0	0	0	3	1	10	0	0	2	2
0	18	0	3	70	22	3	1	1	35	150	25	80	0	2	0	0	0	4	0	0	0	0	2	3	0	0	0	4	0	3	0	25	1	0	7	9
1	39	0	2	150	0	3	0	3	37	80	15	120	2	1	4	1	0	0	0	0	0	0	0	0	1	4	1	0	0	0	1	18	1	0	3	4
0	40	1	3	0	0	1	1	0	36	135	27	75	2	2	0	0	0	5	0	0	0	0	0	0	0	0	0	5	0	0	0	25	1	1	9	11
1	42	5	5	48	0	3	2	1	37	87	14	95	0	0	0	0	0	0	0	0	0	0	0	4	0	0	0	0	0	4	0	16	1	0	1	1
0	32	0	2	11	0	1	1	1	37	128	25	113	0	0	3	1	0	0	0	0	0	0	0	0	0	3	1	0	0	0	0	10	0	0	4	4
0	44	0	2	7	0	1	1	3	37	100	15	181	0	0	3	2	0	0	0	0	0	0	0	0	0	3	2	0	0	0	0	13	0	0	1	1
0	48	0	2	18	0	1	1	3	36.7	94	20	145	0	0	4	1	0	0	0	0	0	0	0	0	0	4	1	0	0	0	0	17	1	0	1	1
0	32	3	4	7	0	3	3	1	36.8	112	20	142	0	1	0	0	0	0	3	0	0	0	0	0	1	0	0	0	3	0	1	10	0	0	3	4
0	50	0	2	1	1	0.5	1	0	37.2	100	35	68	3	2	5	0	0	4	2	0	0	0	0	0	0	5	0	4	2	0	0	45	1	1	9	11
0	33	0	4	26	0	4	1	3	36.8	90	20	106	0	1	0	0	0	3	4	0	0	0	0	0	0	0	0	3	4	0	0	25	1	0	1	2
1	49	5	2	16	0	1	2	3	37	90	15	123	1	0	4	1	0	0	0	0	0	0	0	0	0	4	1	0	0	0	0	17	1	0	2	2
0	60	0	2	6	0	1	1	3	37	86	15	192	1	0	3	1	0	0	0	0	0	0	0	0	0	3	1	0	0	0	0	10	0	0	2	2
0	59	0	2	0	0	4	3	1	37.2	64	20	180	1	0	4	1	0	0	0	0	0	0	0	0	0	4	1	0	0	0	0	17	1	0	2	2
0	24	0	5	13	0	2	1	1	37.4	90	20	86	0	0	0	0	0	0	0	0	0	0	0	3	1	0	0	0	0	3	1	10	0	0	2	2
1	24	0	5	33	5	2	1	1	37	62	20	78	0	1	0	0	0	3	1	0	0	0	0	4	1	0	0	3	1	4	1	26	1	0	3	4
0	61	1	2	16	0	1	1	1	37	74	15	150	0	0	4	2	0	0	0	0	0	0	2	0	0	4	2	0	0	2	0	24	1	0	1	1
0	65	0	2	0	0	1	1	0	36	61	27		3	2	5	1	0	0	0	0	0	0	0	0	0	5	1	0	0	0	0	26	1	1
0	35	0	2	0	0	1	1	0	35				3	0	5	1	0	0	0	0	0	0	0	0	0	5	1	0	0	0	0	26	1	1
1	45	0	2	5	0	1	1	0	37.2	60	20	220	2	1	5	0	1	2	1	0	0	0	0	0	0	5	0	2	1	0	0	30	1	1	5	6
1	72	1	2	5	0	3	3	2	37	114	15	127	1	1	4	0	0	3	0	0	0	0	0	0	0	4	0	3	0	0	0	25	1	0	4	5
0	66	0	2	19	0	0.5	1	1	37	121	15	147	1	0	4	2	0	0	0	0	0	0	0	0	0	4	2	0	0	0	0	20	1	0	4	4
0	33	1	2	46	46	2	1	0	36.5	66	20	108	3	1	3	0	5	3	0	0	0	0	0	0	0	5	0	3	0	0	0	34	1	1	4	5
0	35	3	2	0	0	2	0	4	37	96	21	114	0	0	3	1	0	0	0	0	0	0	0	0	0	3	1	0	0	0	0	10	0	0	2	2
1	47	0	2	31	0	1	1	3	38.1	88	28	134	2	1	5	0	0	3	0	0	0	0	0	3	0	5	0	3	0	3	0	43	1	0	4	5
0	56	0	3	20	0	2	1	1	37	88	20	122	0	2	1	0	0	3	3	0	0	0	2	0	0	1	0	3	3	2	0	22	1	0	1	3
0	25	0	5	0	0	2	1	4	37	88	23	124	0	0	1	0	0	2	0	0	0	0	0	3	0	1	0	2	0	3	0	14	0	0	2	2
0	38	1	2	0	0	1	1	1	36.5	70	21	124	0	0	1	1	0	0	0	3	0	0	0	0	0	3	1	0	0	0	0	10	0	0	2	2
0	51	0	2	20	0	3	1	0	37.2	99	18	112	2	1	4	2	0	4	0	0	0	0	1	3	1	4	2	4	0	3	1	41	1	1	3	4
0	55	2	3	21	0	2	1	1	36.5	70	20	138	0	1	1	2	0	3	0	0	2	2	0	0	0	1	2	3	2	0	0	17	1	0	1	2
0	41	0	2	15	0	1	2	1	37.2	77	18	175	0	0	4	2	1	1	0	0	0	0	1	0	0	4	2	1	0	1	0	21	1	0	1	1
1	30	0	2	0	0	1	1	0	35				3	2	5	1	0	0	0	0	0	0	0	0	0	5	1	0	0	0	0	26	1	1
1	22	0	2	28	0	1	1	3	37.2	85	20	121	0	0	3	0	0	0	0	0	0	0	0	0	1	3	0	0	0	0	1	10	0	0	1	1
1	52	0	2	3	0	72	1	0	37.3	85	26	159	3	1	5	0	0	4	0	0	0	0	0	0	0	5	0	4	0	0	0	41	1	1	5	6
0	58	0	3	96	0	4	1	3	36.5	62	20	70	0	1	2	0	0	1	0	2	5	2	0	0	0	2	0	5	2	0	0	33	1	0	3	4
0	34	0	2	8	0	0.5	1	3	37	76	15	128	2	1	4	1	0	3	0	0	0	0	2	0	0	4	1	3	0	2	0	29	1	0	3	4
0	56	0	2	19	0	5	1	3	37.2	113	20	90	0	2	3	2	0	3	0	0	0	0	0	0	0	3	2	3	0	0	0	22	1	0	4	6
0	54	0	2	37	0	1	1	3	36.5	73	10	156	2	1	4	2	0	1	0	0	0	0	2	0	0	4	2	1	0	2	0	24	1	0	2	3
1	45	0	2	0	0	2	1	0	36	124	27	79	3	0	4	0	0	0	0	0	0	0	0	3	0	4	0	0	0	3	0	25	1	1	9	9
0	28	0	2	10	0	1	1	3	36.7	78	12	118	0	0	4	2	0	0	0	0	0	0	0	0	0	4	2	0	0	0	0	20	1	0	0	0
0	29	6	2	13	0	12	1	1	36.7	89	19	134	0	0	3	2	0	0	0	0	0	0	0	0	0	3	2	0	0	0	0	13	0	0	1	1
0	43	0	2	40	0	0.5	1	3	36.2	74	15	139	2	2	5	0	0	3	0	0	0	0	3	1	0	5	0	3	0	3	0	43	1	0	3	5
0	17	0	2	0	0	3	1	4	36.5	80	21	140	0	0	3	2	0	0	0	0	0	0	0	1	0	3	2	0	0	1	0	14	0	0	2	2
1	74	0	2	0	0	2	1	4	37	74	25	200	1	1	3	2	0	1	0	0	0	0	0	0	0	3	2	1	0	0	0	14	0	0	5	6
0	47	1	3	0	0	2	1	4	36.5	76	21	167	0	0	1	0	0	3	0	0	0	3	0	2	0	1	0	3	3	2	0	22	1	0	2	2
0	38	3	3	0	0	0.5	1	0	35.6		5		3	2	0	0	0	5	1	0	0	0	0	0	0	0	0	5	1	0	0	26	1	1
0	51	0	2	3	0	5	1	3	37.2	80	20	144	0	0	4	1	0	0	0	0	0	0	0	0	0	4	1	0	0	0	0	17	1	0	1	1
1	35	0	2	19	0	1	3	3	37	80	15	160	3	0	5	0	1	0	0	0	0	0	0	0	1	5	0	0	0	0	1	26	1	0	4	4
0	34	6	4	0	0	1	1	0	36	126	23	78	2	0	2	0	0	0	4	0	0	0	2	3	0	2	0	0	4	3	0	29	1	1	8	8
0	34	0	5	3	6	1	1	1	37	123	20	95	0	0	3	0	0	0	0	0	0	0	0	4	1	3	0	0	0	4	1	26	1	0	4	4
0	16	6	2	3	0	8	1	3	36.8	76	20	120	0	0	3	1	0	0	0	0	0	0	0	0	0	3	1	0	0	0	0	10	0	0	1	1
0	59	0	2	1	0	1	1	0	37	75	10	55	2	2	4	1	0	3	0	0	0	0	0	0	1	4	1	3	0	0	1	26	1	1	5	7
0	32	0	2	7	0	1	1	3	37.3	80	22	124	0	0	3	0	0	0	0	0	0	0	0	0	1	3	0	0	0	0	1	10	0	0	2	2
0	50	5	5	0	0	1	1	4	36.8	69	20	136	0	0	0	0	0	0	0	0	0	0	0	4	1	0	0	0	0	4	1	17	1	0	1	1
1	35	5	2	3	0	2	1	3	37.2	83	22	148	0	0	3	2	0	0	0	0	0	0	0	1	1	3	2	0	0	1	1	14	0	0	2	2
1	39	0	2	1	0	1	1	0	36.8	86	10	85	3	2	5	0	0	3	0	0	0	0	2	0	0	5	0	3	0	2	0	38	1	1	4	6
1	76	5	2	2	0	2	1	2	37	72	27	201	3	0	4	1	0	0	0	0	0	0	0	0	0	4	1	0	0	0	0	17	1	0	7	7
0	60	0	2	0	0	1	1	0	36.2	110	33	65	3	0	5	1	0	0	0	0	0	0	0	0	0	5	1	0	0	0	0	26	1	1	10	10
1	67	0	5	48	0	2	1	1	36.8	106	20	157	0	0	0	0	0	0	0	0	0	0	0	3	1	0	0	0	0	3	1	10	0	0	2	2
0	53	1	3	13	0	2	1	1	36.8	67	20	136	0	2	1	0	0	4	2	0	0	0	0	0	0	1	0	4	2	0	0	21	1	0	1	3
0	48	0	2	3	0	1	1	0	36.5	66	18	180	3	0	4	2	0	0	0	0	0	0	0	0	0	4	2	0	0	0	0	20	1	1	4	4
1	24	1	3	12	0	4	1	3	37.2	110	20	115	0	2	0	1	2	4	0	0	0	0	0	0	1	2	1	4	0	0	1	21	1	0	2	4
0	41	0	2	10	0	4	3	3	37.2	86	19	120	1	2	4	2	0	3	0	0	0	0	0	2	0	4	2	3	0	2	0	29	1	0	2	4
0	26	5	3	22	0	2	1	1	36.8	112	20	121	0	2	0	0	0	3	0	0	0	0	2	0	0	0	0	3	0	2	0	13	0	0	3	5
1	60	5	2	15	0	1	1	3	36.8	62	18	136	0	1	4	0	0	1	0	0	0	0	0	0	0	4	0	1	0	0	0	17	1	0	1	2
0	41	1	4	39	0	3	1	1	37.1	97	20	104	1	2	1	0	0	3	4	0	0	2	2	0	0	1	0	3	4	2	0	29	1	0	2	4
0	25	0	3	9	0	3	1	3	36.8	72	18	129	0	2	2	0	0	4	0	0	0	0	0	0	1	2	0	4	0	0	1	21	1	0	1	3
0	24	0	2	7	0	0.5	1	0	37	60	15	124	3	1	5	0	0	2	0	0	0	0	2	0	0	5	0	2	0	2	0	33	1	1	4	5
0	64	0	2	40	0	1	1	3	36.7	100	28	128	2	1	5	2	0	1	0	0	0	0	1	3	1	5	2	1	0	3	1	38	1	0	4	5
0	33	1	4	6	0	1	1	3	37	69	16	105	0	0	0	0	0	0	0	0	0	3	0	3	0	0	0	0	3	3	0	18	1	0	1	1
0	43	1	3	13	6	2	1	1	37.2	71	20	123	0	2	0	0	0	3	0	0	0	0	0	3	0	0	0	3	0	3	0	18	1	0	1	3
0	39	6	3	7	0	6	1	3	37.2	89	20	146	0	1	0	0	0	3	0	0	0	0	1	0	1	0	0	3	0	1	1	11	0	0	1	2
0	16	0	1	0	0	3	3	4	37.2	80	20	134	0	0	1	3	0	0	0	0	0	0	0	0	0	1	3	0	0	0	0	10	0	0	1	1
0	46	0	3	57	23	1	1	1	36.8	82	24	125	1	2	3	0	0	4	2	0	0	0	3	1	0	3	0	4	2	3	0	34	1	0	3	5
0	57	0	5	106	8	1	1	1	36.5	100	20	111	0	0	0	0	0	0	0	0	0	0	0	4	1	0	0	0	0	4	1	17	1	0	1	1
0	46	0	3	0	0	0.5	1	0	35				3	2	0	0	0	5	0	0	0	0	0	0	1	0	0	5	0	0	1	26	1	1
0	59	0	3	72	48	1	1	1	36.8	119	24	123	0	2	2	0	0	4	0	0	0	0	2	2	0	2	0	4	0	2	0	24	1	0	4	6
0	28	0	2	1	0	1	3	0	37.2	72	15	135	3	1	5	0	1	3	2	0	0	0	1	0	0	5	0	3	2	1	0	38	1	1	4	5
0	25	3	1	0	0	1	1	4	36.8	86	19	128	0	0	0	3	1	0	0	0	0	0	0	0	0	1	3	0	0	0	0	10	0	0	1	1
0	42	1	2	0	0	1	1	0	36.2	103	27	58	1	0	5	1	0	0	0	0	0	0	0	0	0	5	1	0	0	0	0	26	1	1	7	7
0	42	5	2	7	5	5	1	3	36.6	115	29	90	1	1	3	2	0	3	0	0	2	2	0	3	0	3	2	3	2	3	0	27	1	0	6	7
0	44	0	2	42	0	1	1	1	36.8	81	18	127	0	1	3	2	0	3	0	0	0	0	0	0	0	3	2	3	0	0	0	22	1	0	1	2
0	58	0	3	7	0	2	1	3	37.2	69	20	151	0	1	0	1	0	3	0	0	0	2	0	0	0	0	1	3	2	0	0	14	0	0	1	2
0	34	0	2	22	0	24	3	3	37	68	15	186	1	0	4	1	0	0	0	0	0	0	0	0	0	4	1	0	0	0	0	17	1	0	2	2
0	16	5	2	0	0	1	1	1	36.8	98	20	131	1	0	1	1	3	0	0	0	0	0	0	0	0	3	1	0	0	0	0	10	0	0	2	2
0	46	1	3	27	0	2	1	1	36.8	90	30	77	0	1	0	0	0	3	0	0	2	0	2	3	0	0	0	3	0	3	0	18	1	0	5	6
0	45	1	5	37	0	1	1	1	36.8	94	19	131	0	0	0	0	0	0	0	0	0	0	2	3	1	0	0	0	0	3	1	10	0	0	1	1
1	20	0	2	28	0	2	3	3	36.8	92	18	118	1	0	4	1	0	0	0	0	0	0	0	0	0	4	1	0	0	0	0	17	1	0	2	2
1	50	1	2	0	0	2	1	0	36.2	98	21	52	3	0	5	0	0	0	0	0	0	0	0	0	1	5	0	0	0	0	1	26	1	1	8	8
0	59	0	2	0	0	1	1	0	36				3	0	5	0	0	0	0	0	0	0	0	0	1	5	0	0	0	0	1	26	1	1
0	22	1	5	14	0	1	2	1	37.2	93	21	121	0	0	0	0	0	0	0	0	0	0	0	3	1	0	0	0	0	3	1	10	0	0	2	2
0	47	3	2	0	0	1	1	0	35	94	21	60	3	0	5	1	0	0	0	0	0	0	0	0	0	5	1	0	0	0	0	26	1	1	8	8
1	48	1	2	5	0	2	2	3	37	62	20	105	0	0	3	1	0	0	0	0	0	0	0	0	0	3	1	0	0	0	0	10	0	0	1	1
0	25	0	4	8	0	0.5	1	3	36.8	80	22	130	0	1	0	1	0	0	3	0	0	0	0	0	0	0	1	0	3	0	0	10	0	0	2	3
0	48	0	3	19	0	3	1	1	37.2	95	20	94	0	2	1	0	0	3	3	0	0	0	2	2	1	1	0	3	3	2	1	22	1	0	2	4
0	70	0	2	3	0	1	3	2	36.8	84	10	198	3	0	5	1	0	0	0	0	0	0	0	0	0	5	1	0	0	0	0	26	1	0	3	3
0	66	6	3	20	0	2	1	1	37.2	77	20	134	0	1	0	1	0	3	0	0	0	0	2	0	0	0	1	3	0	2	0	14	0	0	1	2
0	44	0	5	90	4	4	1	1	37	93	20	93	1	0	0	0	0	0	0	0	0	0	1	4	1	0	0	0	0	4	1	17	1	0	3	3
0	52	0	2	4	0	0.5	1	4	36.5	88	18	105	1	0	3	2	0	0	0	0	0	0	1	1	1	3	2	0	0	1	1	14	0	0	2	2
0	53	5	3	8	0	112	1	3	36.8	85	20	109	0	1	0	0	0	3	0	0	0	0	0	0	1	0	0	3	0	0	1	10	0	0	1	2
0	47	0	2	15	0	1	1	3	36.5	86	19	136	2	0	5	1	0	0	0	0	0	0	0	0	0	5	1	0	0	0	0	26	1	0	3	3
1	40	0	2	20	0	3	1	1	36.5	82	20	109	0	1	3	0	0	3	0	0	0	0	2	2	0	3	0	3	0	2	0	22	1	0	1	2
1	50	0	5	40	0	1	1	1	36.2	124	20	162	2	1	3	0	0	1	0	0	0	2	0	4	1	3	0	1	2	4	1	29	1	0	5	6
1	48	1	5	6	6	3	1	0	37.6	134	24	87	1	2	1	0	0	3	2	0	0	0	0	4	0	1	0	3	2	4	0	29	1	1	7	9
0	30	0	2	35	0	4	3	1	36.8	81	23	138	2	0	5	0	0	0	0	0	0	0	0	3	0	5	0	0	0	3	0	34	1	0	4	4
0	38	3	3	5	5	1	1	3	37.5	122	20	82	0	2	0	0	0	4	0	0	0	0	0	0	1	0	0	4	0	0	1	17	1	0	4	6
0	83	0	5	0	0	1	1	0	36.2	110	25	111	0	2	0	1	1	3	0	0	2	2	2	4	0	1	1	3	2	4	0	29	1	1	3	5
0	27	6	2	7	0	0.5	1	3	37	54	15	124	1	0	4	0	0	0	0	0	0	0	2	3	0	4	0	0	0	3	0	25	1	0	2	2
0	36	0	2	7	0	0.5	1	3	37	90	15	110	1	0	4	1	0	0	0	0	0	0	0	0	0	4	1	0	0	0	0	17	1	0	2	2
1	56	3	1	7	0	1	1	1	37	110	20	147	0	0	1	3	0	0	0	0	0	0	0	0	0	1	3	0	0	0	0	10	0	0	2	2
1	66	0	2	14	0	1	3	3	36.5	74	18	143	1	0	4	0	0	0	0	0	0	0	1	0	0	4	0	0	0	1	0	17	1	0	2	2
0	34	0	5	21	0	1	1	1	36.9	93	18	134	0	0	0	0	0	0	0	0	0	0	2	3	1	0	0	0	0	3	1	10	0	0	1	1
0	44	0	5	20	0	1	1	1	36.8	103	20	83	0	0	0	0	0	0	0	0	0	0	0	3	1	0	0	0	0	3	1	10	0	0	3	3
0	47	0	2	44	0	0.5	1	3	37	108	20	136	1	1	5	2	0	4	0	2	2	2	0	3	2	5	2	4	2	3	2	50	1	0	3	4
1	61	0	2	70	0	3	1	3	37.2	77	20	106	0	1	1	2	0	3	0	3	2	0	2	3	1	3	2	3	0	3	1	27	1	0	1	2
0	50	0	3	36	0	2	1	1	37.5	63	20	69	0	1	0	0	1	3	0	0	3	0	3	0	0	1	0	3	0	3	0	19	1	0	4	5
0	25	0	2	0	0	2	1	4	36.8	84	18	132	0	0	3	2	0	0	0	0	0	0	0	0	0	3	2	0	0	0	0	13	0	0	1	1
0	42	1	5	3	0	2	1	1	37	107	20	135	0	1	1	0	0	1	0	0	0	0	0	2	1	1	0	1	0	2	1	6	0	0	2	3
0	49	1	5	20	0	2	3	1	37	80	20	114	0	0	0	0	0	0	0	0	2	2	2	4	0	0	0	2	2	4	0	24	1	0	1	1
0	49	5	3	10	0	24	3	1	36.8	88	20	120	0	2	0	0	0	4	1	0	0	0	0	0	0	0	0	4	1	0	0	17	1	0	1	3
0	42	3	5	6	0	1	1	1	36.8	80	18	105	0	0	0	0	0	0	0	0	0	0	3	0	1	0	0	0	0	3	1	10	0	0	1	1
0	37	0	2	0	0	0.5	1	0	35				3	2	5	1	0	0	0	0	0	0	0	0	0	5	1	0	0	0	0	26	1	1
0	54	0	2	2	0	1	1	0	36.8	105	27	120	3	1	5	0	0	3	0	0	0	2	0	0	0	5	0	3	2	0	0	38	1	1	6	7
0	31	3	3	12	0	4	1	1	37.1	92	20	122	0	0	1	0	0	3	0	0	0	0	1	0	0	1	0	3	0	1	0	11	0	0	1	1
0	37	1	5	64	6	2	1	1	36.9	82	25	80	0	1	2	0	0	2	0	0	0	0	2	3	0	2	0	2	0	3	0	17	1	0	4	5
0	68	0	2	4	0	2	3	2	36	82	21	118	1	0	4	1	0	0	0	0	0	0	0	0	0	4	1	0	0	0	0	17	1	0	3	3
0	25	0	2	119	30	16	1	1	37.1	78	27	68	1	2	3	2	0	3	3	0	0	0	0	3	0	3	2	3	3	3	0	27	1	0	6	8
0	50	0	3	28	0	0.5	2	1	36.8	100	20	80	0	2	0	0	0	3	3	0	0	0	0	0	0	0	0	3	3	0	0	18	1	0	3	5
0	41	0	4	0	0	1	1	0	36	102	20	93	1	0	3	0	0	1	5	0	0	0	0	0	0	3	0	1	5	0	0	35	1	1	4	4
1	21	1	2	0	0	3	2	0	38.1	125	27	108	3	1	3	1	5	3	0	0	0	0	0	0	0	5	1	3	0	0	0	35	1	1	7	8
0	45	6	2	20	0	1	2	3	36.8	83	20	101	1	2	3	2	0	3	0	0	0	0	2	0	0	3	2	3	0	2	0	22	1	0	2	4
0	50	0	3	13	0	3	1	1	36.8	90	20	82	0	2	0	0	0	3	3	0	0	0	0	0	0	0	0	3	3	0	0	18	1	0	2	4
0	23	6	2	14	0	2	1	1	36.8	81	21	124	0	0	0	0	4	0	0	0	0	2	0	0	0	4	0	0	2	0	0	20	1	0	2	2
0	51	1	2	25	6	1	1	1	36.7	81	15	153	0	2	4	0	0	0	3	0	0	0	0	3	0	4	0	0	3	3	0	34	1	0	1	3
0	17	0	5	17	0	1	1	1	37	86	20	118	0	0	0	0	0	0	0	0	0	0	0	4	1	0	0	0	0	4	1	17	1	0	1	1
0	26	4	3	16	0	2	1	3	37	80	20	133	0	0	0	0	0	3	0	0	0	0	0	0	1	0	0	3	0	0	1	10	0	0	1	1
0	42	0	2	0	0	3	1	0	36	125	33		3	2	3	0	0	3	0	0	0	0	0	0	0	3	0	3	0	0	0	18	1	1
1	45	0	5	3	4	5	1	3	37.9	61	18	75	0	0	0	0	0	0	0	0	0	0	4	0	1	0	0	0	0	4	1	17	1	0	3	3
0	20	2	3	13	0	2	1	1	37	88	18	106	0	2	0	0	1	4	0	0	0	0	0	2	0	1	0	4	0	2	0	21	1	0	1	3
0	54	0	2	9	0	4	1	3	37	65	15	165	0	0	4	2	0	0	0	0	0	0	0	0	0	4	2	0	0	0	0	20	1	0	1	1
1	42	0	2	34	0	2	1	3	36.3	94	18	96	2	0	4	1	0	0	0	0	0	0	0	0	0	4	1	0	0	0	0	17	1	0	4	4
0	28	0	2	6	0	2	1	3	36.5	88	18	133	1	0	4	2	0	0	0	0	0	0	2	0	1	4	2	0	0	2	1	24	1	0	2	2
0	50	0	2	18	0	1	1	3	36.8	89	20	109	1	1	4	2	0	4	2	0	0	0	0	0	0	4	2	4	2	0	0	36	1	0	2	3
0	50	0	2	19	0	1	1	1	37.2	77	22	117	2	1	4	0	0	2	0	0	0	0	2	0	0	4	0	2	0	2	0	24	1	0	4	5
0	32	0	2	9	0	1	1	3	37	114	15	115	2	0	3	1	0	0	0	0	0	0	0	0	0	3	1	0	0	0	0	10	0	0	5	5
0	80	0	2	0	0	1	1	0	35				3	0	5	1	0	0	0	0	0	0	0	0	0	5	1	0	0	0	0	26	1	1
0	42	0	2	7	0	1	1	0	36.8	68	21	150	2	0	4	1	0	0	0	0	0	0	0	0	0	4	1	0	0	0	0	17	1	1	4	4
0	60	0	2	8	0	2	1	3	37.8	78	24	138	0	1	3	0	0	1	0	0	0	0	0	0	0	3	0	1	0	0	0	10	0	0	2	3
0	28	0	2	8	0	1	1	3	37	80	15	140	0	0	4	2	0	0	0	0	0	0	1	0	0	4	2	0	0	1	0	21	1	0	1	1
1	45	0	2	8	0	2	1	0		77	33	95	3	2	5	0	1	3	3	0	0	3	0	2	0	5	0	3	3	2	0	43	1	1
0	54	0	2	20	0	1	1	3	37	99	15	120	2	2	4	2	0	3	0	0	0	0	2	0	0	4	2	3	0	2	0	29	1	0	3	5
0	30	1	2	20	0	8	1	3	37	105	18	130	1	0	4	2	0	0	0	0	0	0	0	0	0	4	2	0	0	0	0	20	1	0	3	3
0	46	0	2	20	0	1	1	3	36.5	82	22	156	0	0	3	2	0	0	0	0	0	0	0	0	1	3	2	0	0	0	1	14	0	0	2	2
1	52	0	2	15	0	1	1	3	36.5	63	14	145	1	1	4	2	0	1	0	0	2	0	0	0	0	4	2	2	0	0	0	24	1	0	1	2
0	55	0	2	26	0	1	1	3	36.5	92	17	155	2	1	4	0	0	3	0	0	0	0	0	0	0	4	0	3	0	0	0	25	1	0	3	4
0	55	0	2	3	0	1	1	0	36.4	104	29	156	1	2	5	0	0	3	0	0	0	0	0	3	0	5	0	3	0	3	0	43	1	1	4	6
0	18	1	3	14	0	5	1	1	37	86	20	142	0	0	0	0	0	0	0	0	3	0	0	0	1	0	0	3	0	0	1	10	0	0	1	1
0	50	6	3	14	0	2	3	2	36.8	94	20	74	1	2	0	0	0	3	3	0	0	0	2	2	0	0	0	3	3	2	0	22	1	0	4	6
1	50	0	2	14	0	1	1	3	37	74	15	133	2	0	5	0	1	3	0	0	0	0	0	0	0	5	0	3	0	0	0	34	1	0	3	3
0	58	1	2	4	0	1	1	3	37	95	15	143	2	1	4	0	0	3	2	0	0	0	2	0	0	4	0	3	2	2	0	29	1	0	3	4
0	45	0	2	2	2	4	1	2	36	109	16	104	2	2	5	0	0	3	0	0	0	0	3	2	0	5	0	3	0	3	0	43	1	0	4	6
0	32	3	3	15	0	1	1	1	37.2	112	20	62	0	1	1	2	0	3	0	0	0	0	0	0	1	1	2	3	0	0	1	14	0	0	6	7
0	43	2	5	27	0	1	1	1	37	102	20	172	0	0	0	0	0	0	0	0	0	0	0	3	1	0	0	0	0	3	1	10	0	0	2	2
0	42	6	3	4	0	2	1	3	37.2	105	20	77	0	1	1	1	0	3	0	0	0	0	0	0	0	1	1	3	0	0	0	11	0	0	4	5
0	45	1	5	3	0	2	1	2	36.8	70	20	123	0	0	0	0	0	1	0	0	0	2	0	3	0	0	0	1	2	3	0	14	0	0	1	1
1	48	0	3	37	0	2	1	1	37	56	20	78	0	2	0	0	0	4	3	0	0	0	2	3	0	0	0	4	3	3	0	34	1	0	3	5
0	32	1	2	2	0	1	1	0	37	117	33	158	3	1	5	0	0	3	0	0	0	0	0	3	0	5	0	3	0	3	0	43	1	1	8	9
1	72	1	2	12	0	3	3	0	37.5	103	26	175	2	0	4	1	0	0	0	0	0	0	0	0	0	4	1	0	0	0	0	17	1	1	5	5
0	58	1	2	0	0	1	1	0	37				3	2	5	2	1	4	2	0	0	0	0	0	0	5	2	4	2	0	0	45	1	1
0	46	6	5	0	0	1	1	4	37.4	103	22	148	0	0	0	0	0	0	0	0	0	0	0	3	1	0	0	0	0	3	1	10	0	0	3	3
0	50	0	2	3	0	0.5	1	0	36.4	89	14	194	3	0	5	0	1	1	0	0	0	0	2	2	0	5	0	1	0	2	0	30	1	1	3	3
0	54	1	2	17	0	1	1	1	36	85	30	150	0	2	4	0	0	4	2	0	0	2	0	0	0	4	0	4	2	0	0	36	1	0	3	5
0	47	3	3	10	0	2	1	1	37.5	103	20	148	0	1	0	0	0	3	1	0	0	0	0	0	0	0	0	3	1	0	0	10	0	0	2	3
0	48	0	2	14	0	2	3	3	37.2	85	20	122	1	0	4	1	0	0	0	0	0	0	0	0	0	4	1	0	0	0	0	17	1	0	2	2
0	33	1	4	0	0	0.5	1	0	36	140	33		3	2	3	0	0	0	4	0	0	0	0	0	0	3	0	0	4	0	0	25	1	1
0	60	0	2	0	0	0.5	1	0	35				3	0	5	0	0	1	0	0	0	0	0	0	0	5	0	1	0	0	0	26	1	1
0	60	0	5	1	1	0.5	1	0	36.7	110	30	57	1	1	3	0	3	2	0	0	0	0	0	5	0	3	0	2	0	5	0	38	1	1	8	9
1	79	0	2	0	0	0.5	1	4	36.5	80	20	88	1	2	4	1	0	0	0	0	0	0	0	0	0	4	1	0	0	0	0	17	1	0	3	5
1	45	0	2	19	0	1	1	3	36.7	63	30	110	1	1	4	0	1	3	0	0	0	0	0	0	0	4	0	3	0	0	0	25	1	0	4	5
1	39	0	2	49	0	1	1	3	36.3	128	30	115	2	2	4	0	0	3	0	0	2	2	2	0	0	4	0	3	2	2	0	29	1	0	7	9
0	19	6	3	0	0	1	1	0	36.2	137	33		2	2	3	0	0	4	3	0	0	3	0	4	0	3	0	4	3	4	0	41	1	1
0	55	1	2	7	0	1	1	2	37	69	23	100	0	1	3	0	0	1	0	0	3	2	0	0	0	3	0	3	2	0	0	22	1	0	3	4
0	56	1	2	0	0	1	1	1	36.2	62	22	100	1	0	3	2	0	0	0	0	0	0	2	3	0	3	2	0	0	3	0	22	1	0	4	4
0	48	0	2	9	0	6	1	3	37.4	80	22	179	0	1	3	2	0	1	0	0	0	0	0	0	0	3	2	1	0	0	0	14	0	0	2	3
0	60	1	2	1	0	1	1	0	36.5	71	27	163	3	0	5	1	0	0	0	0	0	0	0	0	0	5	1	0	0	0	0	26	1	1	5	5
0	52	1	2	20	0	1	1	1	36.5	80	23	107	0	0	2	2	5	0	0	0	0	0	0	0	0	5	2	0	0	0	0	29	1	0	2	2
0	53	6	2	0	0	0.5	1	0	35				3	0	5	1	0	0	0	0	0	0	0	0	0	5	1	0	0	0	0	26	1	1
0	45	0	2	0	0	1	1	0	36	120		90	3	1	5	1	0	0	0	0	0	0	0	0	0	5	1	0	0	0	0	26	1	1
1	38	2	3	15	0	2	1	3	37.2	77	20	86	0	1	0	2	0	3	2	0	0	0	0	0	0	0	2	3	2	0	0	17	1	0	2	3
0	23	1	3	8	0	2	1	1	37	71	20	153	0	1	0	0	0	4	0	0	0	0	0	2	0	0	0	4	0	2	0	20	1	0	1	2
0	57	1	2	3	0	2	1	2	36.8	87	15	116	3	1	4	1	0	3	0	0	3	2	2	0	0	4	1	3	2	2	0	29	1	0	4	5
0	42	1	1	0	0	1	1	4	37	84	20	157	0	2	1	3	0	0	0	0	0	0	0	0	0	1	3	0	0	0	0	10	0	0	1	3
0	20	0	4	46	37	4	1	3	37	140	20	68	0	1	0	0	0	0	4	0	0	0	0	4	1	0	0	0	4	4	1	33	1	0	7	8
0	42	0	2	46	0	2	1	3	36.8	134	26	218	2	0	5	0	0	0	0	0	0	0	0	2	0	5	0	0	0	2	0	29	1	0	9	9
0	63	0	3	52	0	2	1	3	37.2	84	20	125	0	2	1	1	0	4	2	0	0	2	0	2	0	1	1	4	2	2	0	24	1	0	1	3
1	39	1	2	0	0	1	1	0	36	28	5		3	0	5	1	0	0	0	0	0	0	0	0	0	5	1	0	0	0	0	26	1	1
0	33	1	3	8	0	2	1	1	37	76	20	148	0	1	0	1	0	3	3	0	0	0	0	0	0	0	1	3	3	0	0	19	1	0	1	2
0	54	5	2	11	0	12	1	3	36.6	88	21	143	0	0	3	0	0	0	0	0	0	0	0	0	1	3	0	0	0	0	1	10	0	0	2	2
1	36	1	2	54	0	2	1	1	37	99	20	111	0	0	4	2	0	0	0	0	2	2	0	3	1	4	2	2	2	3	1	29	1	0	1	1
0	37	1	2	12	0	6	1	3	36.8	103	20	139	0	0	0	0	0	0	0	4	2	0	0	2	1	4	0	2	0	2	1	24	1	0	2	2
0	65	0	2	33	0	3	1	1	36.8	93	23	145	0	0	4	0	0	0	0	0	0	0	0	3	0	4	0	0	0	3	0	25	1	0	2	2
0	47	1	4	61	0	1	1	1	37.1	85	20	108	1	2	3	0	0	3	4	0	0	0	0	3	0	3	0	3	4	3	0	34	1	0	2	4
0	45	1	4	3	0	2	1	0	37	117	20	89	1	2	0	0	0	0	4	0	0	0	0	4	0	0	0	0	4	4	0	32	1	1	5	7
0	45	1	2	0	0	1	1	0	35				3	0	5	2	0	0	0	0	0	0	0	0	0	5	2	0	0	0	0	29	1	1
0	43	6	2	73	73	3	3	0	36.8	117	20	79	1	2	4	1	0	4	0	0	2	2	2	0	0	4	1	4	2	2	0	36	1	1	6	8
0	47	0	2	0	0	1	1	0	36	189			3	0	5	2	0	0	0	0	0	0	0	0	0	5	2	0	0	0	0	29	1	1
0	40	0	2	1	0	1	1	0	37.2	93	24	142	3	1	5	0	0	1	0	0	0	0	0	2	0	5	0	1	0	2	0	30	1	1	5	6
0	49	0	4	14	0	1	1	1	36.7	54	15	79	0	2	0	0	0	1	4	0	0	0	0	0	0	0	0	1	4	0	0	17	1	0	3	5
0	31	2	3	0	0	1	2	0	36				3	2	3	0	0	5	0	0	0	0	0	0	0	3	0	5	0	0	0	34	1	1
0	86	1	2	49	48	4	1	3	37.2	78	20	104	0	2	3	1	0	3	0	2	0	0	2	0	0	3	1	3	0	2	0	22	1	0	1	3
0	48	0	2	4	0	0.5	1	0	37	63	29	179	2	1	5	1	1	1	0	0	0	0	0	3	0	5	1	1	0	3	0	35	1	1	4	5
0	25	0	2	17	0	1	1	3	37	84	18	118	1	0	4	1	0	0	0	0	0	0	0	0	0	4	1	0	0	0	0	17	1	0	2	2
1	27	6	5	21	16	3	1	2	38	68	25	127	1	0	0	0	0	0	3	0	0	2	0	4	0	0	0	0	3	4	0	25	1	0	3	3
0	64	1	2	16	0	1	1	1	36.8	68	22	150	0	1	4	0	0	4	0	0	0	0	2	0	0	4	0	4	0	2	0	36	1	0	2	3
0	77	0	2	19	0	0.5	1	3	37	78	15	107	0	1	4	0	0	0	0	0	0	0	3	0	0	4	0	0	0	3	0	25	1	0	1	2
0	45	1	2	30	0	1	1	3	36.3	56	20	116	2	0	4	1	0	0	0	0	0	0	0	0	0	4	1	0	0	0	0	17	1	0	3	3
0	45	6	2	0	0	0.5	1	0	36				3	1	3	1	5	0	0	0	0	0	0	0	0	5	1	0	0	0	0	26	1	1
0	32	1	2	4	0	0.5	1	0	36.3	102	20	93	2	1	4	0	0	2	4	2	2	0	2	3	0	4	0	2	4	3	0	41	1	1	5	6
0	51	0	2	4	0	4	3	0	36.7	146	25	208	3	1	3	0	0	3	3	0	0	0	0	0	0	3	0	3	3	0	0	27	1	1	10	11
0	45	3	5	28	0	2	1	1	36.8	72	23	80	1	0	0	0	0	0	0	0	0	0	0	4	0	0	0	0	0	4	0	16	1	0	5	5
0	33	0	3	0	0	1	1	2	37	63	20	123	0	0	0	0	0	3	1	0	0	0	0	0	0	0	0	3	1	0	0	10	0	0	1	1
0	50	2	3	11	0	2	1	1	37.2	75	20	120	0	1	0	1	0	3	0	0	0	0	2	0	1	0	1	3	0	2	1	14	0	0	1	2
1	43	0	4	13	0	2	1	1	36.7	105	15	110	0	2	0	0	0	3	4	0	0	0	0	0	0	0	0	3	4	0	0	25	1	0	2	4
0	62	1	3	0	0	1	1	0	36	132	20	116	2	2	2	0	0	4	4	0	0	0	0	0	0	2	0	4	4	0	0	36	1	1	6	8
0	30	0	2	2	0	3	1	0	37.5	109	24	116	2	2	4	0	0	4	0	0	0	2	0	4	0	4	0	4	2	4	0	48	1	1	5	7
1	72	0	2	0	0	1	1	0	36	44	31	44	3	1	5	0	0	0	0	0	0	0	0	0	1	5	0	0	0	0	1	26	1	1	10	11
0	30	0	4	0	0	1	1	0	36	86	31	56	2	2	2	0	0	0	4	0	0	0	0	0	0	2	0	0	4	0	0	20	1	1	8	10
0	79	5	2	5	0	1	1	3	36.5	80	18	178	0	1	3	0	0	2	0	0	0	0	0	0	0	3	0	2	0	0	0	13	0	0	1	2
1	38	1	5	6	0	2	1	1	36.8	73	20	112	1	1	2	1	0	1	0	0	0	0	0	3	0	2	1	1	0	3	0	14	0	0	2	3
0	67	0	3	1	0	1	1	0	36.8	99	26	75	2	2	3	0	0	4	3	0	0	0	0	0	0	3	0	4	3	0	0	34	1	1	6	8
1	57	0	5	0	0	2	1	2	36.2	127	21	154	0	0	0	0	0	0	0	0	0	0	3	0	1	0	0	0	0	3	1	10	0	0	4	4
0	56	2	3	0	0	1	1	0	35.8				3	2	3	0	0	4	4	0	0	0	0	0	0	3	0	4	4	0	0	41	1	1
0	30	0	5	121	0	2	1	1	37.4	85	20	141	0	0	0	0	0	0	0	0	0	0	0	3	1	0	0	0	0	3	1	10	0	0	1	1
1	53	0	3	37	0	3	1	1	37.2	82	20	104	0	1	0	0	0	3	2	0	0	2	0	3	1	0	0	3	2	3	1	22	1	0	1	2
0	36	0	1	8	0	1	1	3	37.6	69	15	99	0	0	2	3	0	0	0	0	0	0	0	0	0	2	3	0	0	0	0	13	0	0	2	2
1	52	0	2	5	0	1	1	0	36.8	88	23	75	2	0	5	1	0	0	0	0	0	0	0	0	0	5	1	0	0	0	0	26	1	1	6	6
0	44	0	3	53	0	3	1	1	37.2	120	20	85	0	2	1	0	0	4	0	0	0	0	0	3	0	1	0	4	0	3	0	26	1	0	4	6
0	53	5	2	4	0	1	0	2	35	56	15	122	3	0	5	1	0	0	0	0	0	0	0	0	0	5	1	0	0	0	0	26	1	0	4	4
1	75	0	2	0	0	1	1	2	37	78	20	136	0	0	3	2	0	0	0	0	0	0	0	0	1	3	2	0	0	0	1	14	0	0	1	1
0	30	6	4	1	0	3	1	0	35	136	31	70	2	2	2	0	0	1	4	0	0	0	2	0	0	2	0	1	4	2	0	24	1	1	10	12
0	53	0	5	16	16	1	1	2	38.3	103	17	55	2	2	2	0	0	3	3	0	0	0	0	4	0	2	0	3	3	4	0	34	1	0	7	9
0	50	0	2	8	0	1	1	3	37	100	17	185	0	1	3	2	0	3	0	0	0	0	0	2	0	3	2	3	0	2	0	22	1	0	1	2
0	40	3	2	14	0	1	1	3	36.5	123	17	90	0	0	3	0	0	3	0	0	0	0	0	0	1	3	0	3	0	0	1	19	1	0	4	4
0	81	0	3	0	0	1	1	0	36.2	52	33	56	3	2	3	0	0	4	0	0	0	0	0	0	0	3	0	4	0	0	0	25	1	1	9	11
0	57	0	2	19	0	3	1	3	36.4	97	15	116	2	1	4	0	1	3	0	0	0	0	0	0	0	4	0	3	0	0	0	25	1	0	3	4
0	51	0	2	14	0	1	1	3	36.5	70	24	174	1	1	3	0	0	1	0	0	0	0	2	0	0	3	0	1	0	2	0	14	0	0	3	4
0	16	0	2	1	0	1	1	3	35.8	81	33	221	3	1	3	2	0	3	0	2	0	0	2	3	1	3	2	3	0	3	1	27	1	0	8	9
0	45	1	2	0	0	1	1	4	36.8	85	20	137	1	1	4	1	0	0	0	0	0	0	0	0	0	4	1	0	0	0	0	17	1	0	2	3
0	49	1	2	2	0	1.5	1	0	37	62	27	183	3	2	5	0	1	3	0	0	2	0	2	0	1	5	0	3	0	2	1	38	1	1	5	7
1	64	0	4	52	53	1	1	3	37.1	75	20	61	1	1	0	0	0	3	4	0	0	0	0	3	1	0	0	3	4	3	1	34	1	0	5	6
0	35	1	3	29	0	1	1	1	36.7	84	15	168	0	2	0	2	0	3	3	0	0	0	2	2	0	0	2	3	3	2	0	22	1	0	1	3
1	40	0	3	0	0	1	1	0	35	83			3	0	3	0	0	4	4	0	0	0	0	0	0	3	0	4	4	0	0	41	1	1
0	30	0	2	18	0	4	1	3	37	80	15	137	1	0	4	2	0	0	0	0	0	0	0	0	0	4	2	0	0	0	0	20	1	0	2	2
1	22	1	3	0	0	1	1	4	36.2	94	22	93	1	2	0	1	0	3	2	0	3	2	0	3	0	0	1	3	2	3	0	22	1	0	4	6
0	17	1	2	15	0	1	1	3	37.2	76	18	103	0	0	3	2	0	0	0	0	0	0	0	0	1	3	2	0	0	0	1	14	0	0	1	1
0	25	0	3	36	0	1	1	1	36.8	74	22	147	1	2	0	0	0	4	0	0	0	0	2	3	0	0	0	4	0	3	0	25	1	0	3	5
0	16	6	2	17	0	1	1	3	36.5	119	27	138	2	0	4	1	0	0	0	0	0	0	0	0	0	4	1	0	0	0	0	17	1	0	6	6
1	55	0	2	4	0	1	1	0	37	85	28	132	3	0	5	2	0	0	0	0	0	0	0	0	0	5	2	0	0	0	0	29	1	1	5	5
0	64	0	2	34	0	1	1	3	37	55	27	120	2	0	5	1	0	0	0	0	0	0	0	0	0	5	1	0	0	0	0	26	1	0	4	4
1	19	0	2	13	0	1	1	3	37	80	15	130	0	0	3	1	0	0	0	0	0	0	0	0	0	3	1	0	0	0	0	10	0	0	1	1
0	28	0	2	6	0	1	1	1	37	80	15	140	0	0	3	1	0	0	0	0	0	0	0	0	0	3	1	0	0	0	0	10	0	0	1	1
1	61	0	3	15	0	5	1	1	37.2	96	20	128	0	2	3	0	0	4	0	0	0	0	0	1	0	3	0	4	0	1	0	26	1	0	1	3
0	37	0	2	12	2	3	1	1	37	78	20	124	0	2	3	1	0	0	0	0	0	0	0	0	1	3	1	0	0	0	1	11	0	0	1	3
0	66	1	2	0	0	2	1	2	36.8	109	27	158	1	2	3	0	0	3	0	0	0	0	0	1	0	3	0	3	0	1	0	19	1	0	4	6
0	57	0	2	72	71	1	1	3	36.8	96	24	132	1	2	4	0	0	3	0	0	0	0	0	3	0	4	0	3	0	3	0	34	1	0	3	5
0	52	0	2	11	0	1	1	3	36.4	54	18	113	0	0	4	2	1	0	0	0	0	0	0	0	1	4	2	0	0	0	1	21	1	0	1	1
0	53	0	2	2	0	1	1	0	37	64	33	158	2	1	5	0	0	2	0	0	0	2	0	1	0	5	0	2	2	1	0	33	1	1	5	6
0	41	0	3	0	0	1	1	1	36.2	73	21	109	0	2	0	0	0	3	2	0	0	0	0	3	0	0	0	3	2	3	0	22	1	0	2	4
0	25	0	2	51	0	1	1	1	37	101	15	147	0	0	4	0	0	0	0	0	0	2	1	2	0	4	0	0	2	2	0	24	1	0	2	2
0	31	1	2	8	0	12	3	3	37	107	17	109	0	0	4	0	0	0	0	0	0	3	0	0	0	4	0	0	3	0	0	25	1	0	2	2
0	47	1	5	8	8	4	1	3	37.5	102	21	96	0	0	0	0	0	0	0	0	0	0	0	4	0	0	0	0	0	4	0	16	1	0	4	4
1	79	0	2	20	0	2	1	3	36.8	124	20	120	0	0	4	0	0	0	0	0	0	0	0	0	1	4	0	0	0	0	1	17	1	0	3	3
0	59	5	2	32	0	2	1	1	36.8	103	20	120	0	0	0	0	0	0	0	4	0	0	0	0	1	4	0	0	0	0	1	17	1	0	2	2
0	50	1	3	3	0	1	1	3	36.8	84	20	130	0	0	0	0	0	0	0	0	3	0	0	0	1	0	0	3	0	0	1	10	0	0	1	1
1	45	0	2	31	0	2	1	1	37	83	19	128	0	1	3	1	0	0	3	0	0	0	0	3	0	3	1	0	3	3	0	27	1	0	1	2
0	35	1	2	3	0	2	1	0	36.5	136	27	192	3	1	5	0	0	1	0	0	0	0	0	0	0	5	0	1	0	0	0	26	1	1	8	9
1	59	0	2	3	0	1	1	0	37	88	18	121	2	1	4	0	0	2	0	0	0	0	0	2	1	4	0	2	0	2	1	24	1	1	3	4
0	50	2	3	0	0	1	2	0	35				3	2	4	0	0	5	0	0	0	0	0	0	0	4	0	5	0	0	0	41	1	1
0	82	5	2	13	0	1	1	0	37	54	15	131	0	0	3	1	0	0	0	0	0	0	0	0	0	3	1	0	0	0	0	10	0	1	1	1
1	39	0	2	28	0	2	3	3	38	84	33	167	2	0	4	0	0	0	0	0	0	0	2	0	0	4	0	0	0	2	0	20	1	0	5	5
0	33	6	2	11	0	24	1	3	37.2	70	20	98	0	2	0	1	5	2	0	0	0	0	0	0	0	5	1	2	0	0	0	30	1	0	2	4
1	23	0	2	1	0	0.5	1	2	36.6	109	20	116	1	0	4	1	0	0	0	0	0	0	0	0	0	4	1	0	0	0	0	17	1	0	3	3
0	50	0	2	6	0	0.5	1	0	37.2	56	15	168	2	0	5	1	0	0	0	0	0	0	0	0	0	5	1	0	0	0	0	26	1	1	3	3
0	50	0	2	5	0	0.5	1	0	37	68	15	134	3	2	4	0	0	3	0	0	0	0	2	0	0	4	0	3	0	2	0	29	1	1	4	6
0	53	0	2	16	0	0.5	1	3	37	87	15	157	1	0	4	2	0	0	0	0	0	0	0	0	0	4	2	0	0	0	0	20	1	0	2	2
0	54	0	4	16	0	3	2	1	36.5	121	20	73	1	0	0	0	0	0	4	0	0	0	0	3	0	0	0	0	4	3	0	25	1	0	6	6
0	33	0	2	1	0	1	1	0	37.2	67	33	220	3	1	5	0	0	0	2	0	0	0	0	0	1	5	0	0	2	0	1	30	1	1	8	9
0	57	0	2	0	0	1	2	0	36.5	114	22	147	3	0	4	0	0	4	0	0	0	0	0	0	1	4	0	4	0	0	1	33	1	1	7	7
0	42	0	2	13	0	1	4	1	37	83	20	104	0	0	3	0	0	0	0	0	0	0	2	0	0	3	0	0	0	2	0	13	0	0	1	1
0	50	0	2	2	0	0.5	1	0	37.2	65	33	130	3	2	5	0	0	4	0	0	0	0	2	2	0	5	0	4	0	2	0	45	1	1	6	8
0	52	0	2	18	2	1	3	1	37	40	15	199	2	2	4	0	0	3	0	0	0	0	0	0	0	4	0	3	0	0	0	25	1	0	4	6
0	51	0	2	1	0	1	1	0	36.5	64	24	211	3	0	5	0	0	0	0	0	0	0	0	3	0	5	0	0	0	3	0	34	1	1	7	7
0	76	5	2	0	0	1	1	3	37	107	22	166	0	0	3	1	0	0	0	0	0	0	0	0	0	3	1	0	0	0	0	10	0	0	3	3
0	25	3	3	0	0	0.5	2	0	36.2	76	31	53	2	2	2	0	0	5	0	0	0	0	0	0	1	2	0	5	0	0	1	30	1	1	8	10
1	74	0	5	0	0	1	1	0	35	71	33	106	3	0	3	0	0	0	0	0	0	0	0	4	0	3	0	0	0	4	0	25	1	1	6	6
1	60	1	2	32	0	2	1	3	37	90	22	111	2	2	4	3	0	4	0	0	0	0	0	0	1	4	3	4	0	0	1	41	1	0	4	6
0	46	0	3	37	0	1	1	1	36.7	122	31		1	2	0	0	0	4	4	0	0	0	0	0	0	0	0	4	4	0	0	32	1	0
0	42	6	2	2	0	1	1	3	37	75	19	123	3	0	5	2	0	2	0	2	0	0	2	0	0	5	2	2	0	2	0	33	1	0	4	4
0	47	0	2	16	0	1	3	3	37.1	56	23	114	1	0	4	1	0	0	0	0	0	0	0	0	0	4	1	0	0	0	0	17	1	0	3	3
1	68	0	2	2	0	1	1	0	36.2	29			3	1	5	2	0	3	0	0	2	2	0	0	0	5	2	3	2	0	0	38	1	1
1	72	0	2	14	14	3	1	0	36.8	92	22	158	2	2	4	0	0	3	0	0	0	0	2	3	0	4	0	3	0	3	0	34	1	1	4	6
0	85	0	5	1	0	2	1	0	36.8	85	20	90	0	0	0	0	0	0	0	0	0	0	0	4	1	0	0	0	0	4	1	17	1	1	2	2
0	63	0	2	4	0	0.5	1	0	37	76	27	122	3	0	5	1	0	0	0	0	0	0	0	0	0	5	1	0	0	0	0	26	1	1	5	5
1	59	0	5	22	6	2	1	1	37	94	20	88	0	1	0	0	0	3	3	0	0	0	0	4	0	0	0	3	3	4	0	34	1	0	2	3
0	50	0	2	11	0	1	1	3	37.2	84	21	134	0	0	4	1	0	0	0	0	0	0	0	0	0	4	1	0	0	0	0	17	1	0	2	2
0	82	5	2	13	0	2	1	3	37	75	17	140	0	0	4	1	0	0	0	0	0	0	0	0	0	4	1	0	0	0	0	17	1	0	1	1
0	50	0	2	6	0	1	1	1	37.2	75	20	124	0	0	3	2	0	0	0	0	0	0	0	0	0	3	2	0	0	0	0	13	0	0	1	1
0	78	5	2	0	0	1	1	0	36.2	87	22	148	2	0	4	1	0	0	0	0	0	0	0	0	0	4	1	0	0	0	0	17	1	1	4	4
1	76	0	2	23	0	2	1	1	37.2	84	27	105	1	2	3	2	0	3	0	0	0	0	2	2	0	3	2	3	0	2	0	22	1	0	3	5
0	40	0	2	11	0	1	1	3	37.1	85	16	146	3	0	5	1	0	0	0	0	0	0	0	0	0	5	1	0	0	0	0	26	1	0	4	4
0	45	0	2	25	0	1	1	3	36.5	58	17	155	2	2	4	0	0	2	0	0	0	0	0	0	0	4	0	2	0	0	0	20	1	0	3	5
0	34	0	5	0	0	1	1	0	35	85			1	0	0	0	0	0	0	0	0	0	0	5	1	0	0	0	0	5	1	26	1	1
0	58	3	5	10	0	20	3	1	36.5	112	20	90	0	0	0	0	0	0	0	0	0	0	3	0	1	0	0	0	0	3	1	10	0	0	4	4
0	68	0	4	49	9	1	1	0	36.7	65	15	87	0	2	3	2	0	3	4	0	0	2	0	0	0	3	2	3	4	0	0	34	1	1	2	4
0	65	0	2	20	3	2	1	3	36.8	90	20	159	1	1	4	0	0	3	0	0	0	0	0	0	0	4	0	3	0	0	0	25	1	0	2	3
1	47	0	2	12	0	6	1	3	37	86	15	161	1	0	3	2	0	0	0	0	0	0	0	0	0	3	2	0	0	0	0	13	0	0	2	2
1	72	5	2	3	0	1	1	0	36.5	123	25	211	3	1	5	0	0	2	0	0	0	0	0	0	0	5	0	2	0	0	0	29	1	1	9	10
0	70	0	2	0	0	3	1	0	36.2	86	27	188	3	2	5	2	0	3	0	0	0	0	2	0	0	5	2	3	0	2	0	38	1	1	5	7
0	45	0	2	3	0	2	1	0	37.2	75	20	187	0	2	4	0	0	4	3	0	0	0	2	0	1	4	0	4	3	2	1	41	1	1	1	3
0	60	0	2	0	0	0.5	1	0	35				3	0	4	0	0	4	0	0	0	0	0	0	0	4	0	4	0	0	0	32	1	1
0	54	0	2	12	0	2	1	3	37	81	17	129	1	0	4	2	0	0	0	0	0	0	0	0	0	4	2	0	0	0	0	20	1	0	2	2
0	52	1	3	22	0	2	1	1	37	96	20	83	0	2	2	0	2	3	0	2	0	0	2	0	1	2	0	3	0	2	1	17	1	0	2	4
1	63	6	2	5	0	1	3	0	37	86	15	79	3	0	5	1	0	0	0	0	0	0	0	0	0	5	1	0	0	0	0	26	1	1	6	6
0	42	1	4	9	7	1	1	3	36.7	101	15	90	0	0	0	0	0	0	3	0	0	0	0	3	0	0	0	0	3	3	0	18	1	0	3	3
0	42	1	2	19	0	3	3	3	36.5	59	27	144	3	0	5	3	0	0	0	0	0	0	0	0	0	5	3	0	0	0	0	34	1	0	5	5
0	40	0	2	2	0	1	1	0	35.6	72	27	197	3	0	4	0	0	0	0	0	0	0	0	0	1	4	0	0	0	0	1	17	1	1	5	5
0	66	5	3	12	0	0.5	3	1	37.2	80	24	125	0	2	0	0	0	4	0	0	0	0	0	0	1	0	0	4	0	0	1	17	1	0	2	4
0	51	1	5	0	0	1	1	4	37	90	20	99	0	0	0	0	0	1	0	0	0	0	0	3	0	0	0	1	0	3	0	10	0	0	2	2
0	36	2	5	9	4	2	1	1	36.8	76	20	120	0	0	0	0	0	0	3	0	0	0	0	4	1	0	0	0	3	4	1	26	1	0	1	1
1	38	0	4	1	0	1	1	0	36.2	137			2	2	3	0	0	3	4	0	0	0	2	1	0	3	0	3	4	2	0	34	1	1
0	56	3	5	0	0	1	1	1	37.1	105	20	90	1	0	2	0	0	0	0	0	0	0	3	0	0	2	0	0	0	3	0	13	0	0	4	4
1	36	1	2	0	0	1	1	0	35	72	20	94	2	1	4	0	0	0	0	0	0	0	0	3	0	4	0	0	0	3	0	25	1	1	4	5
0	51	0	2	13	0	1	1	3	36	89	17	135	0	1	4	0	0	3	0	0	2	2	0	0	0	4	0	3	2	0	0	29	1	0	1	2
1	52	5	2	26	0	2	1	3	36.5	86	25	181	2	1	4	0	0	2	0	0	0	0	0	0	0	4	0	2	0	0	0	20	1	0	4	5
1	40	1	4	35	0	1	1	1	37	102	25	80	1	2	0	0	0	0	3	0	0	0	2	3	0	0	0	0	3	3	0	18	1	0	6	8
0	43	0	3	6	0	2	1	3	37.2	78	20	96	0	1	0	0	0	4	0	0	0	0	0	2	0	0	0	4	0	2	0	20	1	0	2	3
0	67	1	3	29	25	4	1	3	37.1	101	27	98	1	2	0	0	0	4	0	0	2	2	2	0	0	0	0	4	2	2	0	24	1	0	5	7
0	22	3	4	12	0	1	1	1	36.7	106	20	156	0	2	0	0	0	1	3	0	0	0	0	0	0	0	0	1	3	0	0	10	0	0	2	4
0	53	1	2	20	0	1	1	3	37	66	15	204	3	0	4	0	0	0	0	2	0	0	0	0	0	4	0	0	0	0	0	16	1	0	6	6
1	63	0	2	0	0	1	1	0	36.7	56	27	189	3	0	4	1	0	0	0	0	0	0	0	0	0	4	1	0	0	0	0	17	1	1	5	5
1	16	1	2	0	0	1	1	4	37	138	20	137	0	1	3	2	0	3	2	0	0	0	0	3	0	3	2	3	2	3	0	27	1	0	4	5
0	55	2	5	30	4	3	1	1	37	107	20	132	1	2	0	0	0	2	0	0	0	2	0	4	0	0	0	2	2	4	0	24	1	0	3	5
0	55	6	3	9	0	7	1	1	37	82	20	131	0	2	0	0	0	3	3	0	0	0	0	0	0	0	0	3	3	0	0	18	1	0	1	3
0	74	5	2	0	0	1	1	0	36.7	57	10	168	2	1	5	1	0	0	0	0	0	0	0	0	0	5	1	0	0	0	0	26	1	1	2	3
0	75	0	5	41	0	3	1	1	37	92	20	167	0	0	1	0	0	0	0	0	0	0	0	4	1	1	0	0	0	4	1	18	1	0	1	1
0	59	5	2	6	0	4	2	2	37	57	15	142	2	0	4	1	0	0	0	0	0	0	0	0	0	4	1	0	0	0	0	17	1	0	3	3
0	51	0	2	30	0	3	1	3	36	50	17	122	1	2	4	2	0	3	0	0	0	2	0	0	1	4	2	3	2	0	1	29	1	0	3	5
0	43	0	4	4	0	1	1	2	37.1	110	20	130	1	2	2	0	0	0	3	0	0	0	0	3	0	2	0	0	3	3	0	22	1	0	3	5
1	72	0	2	3	0	0.5	1	0	37.2	70	27	209	3	2	5	0	0	3	3	0	0	2	0	0	0	5	0	3	3	0	0	43	1	1	7	9
0	54	0	3	46	0	4	1	1	37.2	84	20	156	0	2	0	1	0	4	0	0	0	0	2	0	1	0	1	4	0	2	1	21	1	0	1	3
0	41	0	3	0	0	1	1	0	35				3	2	2	0	0	4	4	0	0	0	0	0	0	2	0	4	4	0	0	36	1	1
0	33	0	2	0	0	1	1	0	36				3	0	5	1	0	0	0	0	0	0	0	0	0	5	1	0	0	0	0	26	1	1
1	84	0	3	0	0	3	3	4	36.8	96	21	129	1	1	2	0	0	4	0	0	0	0	0	0	0	2	0	4	0	0	0	20	1	0	3	4
0	26	5	2	9	0	72	1	3	37	80	20	132	0	0	0	1	1	0	0	0	0	0	0	0	0	1	1	0	0	0	0	2	0	0	1	1
0	43	1	2	15	0	3	1	1	36.6	72	18	155	0	0	4	1	0	1	0	0	0	0	2	0	0	4	1	1	0	2	0	21	1	0	1	1
0	48	0	2	5	0	4	1	3	36.6	110	20	149	0	1	3	0	1	1	0	0	0	0	0	0	0	3	0	1	0	0	0	10	0	0	2	3
0	43	1	2	23	24	4	1	3	37.7	75	22	125	0	0	0	0	0	3	0	4	0	0	0	0	0	4	0	3	0	0	0	25	1	0	2	2
0	87	0	2	0	0	1	1	0	35	80	31	156	3	2	4	0	0	3	0	0	0	0	0	0	2	4	0	3	0	0	2	29	1	1	6	8
0	33	0	2	36	0	1	1	0	37	112	27	107	2	0	5	2	0	0	0	0	0	0	0	0	0	5	2	0	0	0	0	29	1	1	6	6
0	46	0	3	44	0	1	1	1	36.7	79	20	120	0	2	0	0	0	3	3	0	0	0	0	0	0	0	0	3	3	0	0	18	1	0	1	3
0	45	0	5	0	0	1	1	0	35				3	0	0	0	0	0	0	0	0	0	0	5	1	0	0	0	0	5	1	26	1	1
0	45	0	5	0	0	1	1	0	35	163	27	151	3	2	3	2	0	3	0	0	0	0	0	4	0	3	2	3	0	4	0	34	1	1	8	10
0	41	0	2	56	0	1	1	3	36	58	27	143	2	0	4	0	0	3	0	0	2	2	0	0	1	4	0	3	2	0	1	29	1	0	4	4
0	22	2	2	3	0	0.5	1	0	36	154	31		3	2	4	1	0	4	0	0	0	0	2	0	0	4	1	4	0	2	0	36	1	1
0	55	0	3	12	0	1	1	3	36.8	80	18	151	0	1	1	1	0	3	0	0	0	0	0	2	0	1	1	3	0	2	0	14	0	0	1	2
0	40	0	2	0	0	2	3	0	36.5	68	31	130	3	0	5	1	0	0	0	0	0	0	0	0	0	5	1	0	0	0	0	26	1	1	6	6
0	65	1	3	1	0	1	1	0	37.2	80	33	87	2	2	4	0	0	5	3	0	0	0	0	0	0	4	0	5	3	0	0	50	1	1	6	8
0	45	1	2	11	0	3	1	3	37	47	12	131	1	0	4	1	0	0	0	0	0	0	0	0	0	4	1	0	0	0	0	17	1	0	2	2
0	54	0	2	51	0	2	1	1	36	82	14	120	1	1	3	0	0	0	0	0	0	0	2	3	1	3	0	0	0	3	1	19	1	0	1	2
0	50	0	5	22	0	1	1	1	37	105	17	58	0	1	2	0	0	1	0	2	0	0	2	3	0	2	0	1	0	3	0	14	0	0	5	6
0	45	0	2	68	44	4	2	1	37.6	114	30	42	1	2	3	0	3	3	0	0	0	0	0	0	0	3	0	3	0	0	0	18	1	0	9	11
0	48	5	2	15	0	1	1	3	36.7	123	27	117	0	1	4	1	0	0	0	0	0	0	0	0	0	4	1	0	0	0	0	17	1	0	4	5
0	70	0	2	43	0	2	1	0	36	72	17	101	1	2	3	1	0	3	0	0	0	0	0	0	0	3	1	3	0	0	0	19	1	1	2	4
0	52	0	2	19	0	2	1	3	36	72	17	131	1	0	4	2	0	0	0	0	0	0	0	0	1	4	2	0	0	0	1	21	1	0	2	2
1	61	0	3	27	0	1	1	1	37.2	92	20	142	0	2	0	2	0	4	0	0	0	0	0	0	0	0	2	4	0	0	0	20	1	0	1	3
1	64	3	5	0	0	1	1	1	37	131	14	128	0	0	1	0	0	0	0	0	0	0	3	0	0	1	0	0	0	3	0	10	0	0	3	3
0	45	0	2	0	0	1	1	3	36.8	54	20	116	1	0	3	1	0	0	0	0	0	2	2	0	0	3	1	0	2	2	0	17	1	0	2	2
1	81	5	2	4	0	1	1	1	36.3	72	20	149	0	0	3	1	0	0	0	0	0	0	0	0	0	3	1	0	0	0	0	10	0	0	1	1
0	53	4	3	56	0	0.5	1	1	37.2	78	20	150	0	2	0	0	0	4	0	0	0	0	0	3	0	0	0	4	0	3	0	25	1	0	1	3
0	48	0	5	7	0	2	1	3	36.8	121	19	116	0	0	0	0	0	0	0	0	0	0	0	3	1	0	0	0	0	3	1	10	0	0	3	3
0	57	0	4	12	0	2	4	3	37	47	20	60	0	2	1	0	0	0	4	0	0	0	2	0	0	1	0	0	4	2	0	21	1	0	5	7
0	57	0	2	32	0	2	1	1	35	57	27	157	3	0	4	1	0	0	0	0	0	0	0	0	0	4	1	0	0	0	0	17	1	0	5	5
0	29	0	5	0	0	1	1	0	36	151	31	116	0	0	0	0	0	0	0	0	0	0	0	4	1	0	0	0	0	4	1	17	1	1	6	6
0	31	1	5	72	23	2	1	3	37	111	22	119	0	0	3	0	0	3	0	0	0	2	2	4	0	3	0	3	2	4	0	34	1	0	4	4
0	66	0	3	19	0	4	3	1	36.7	64	15	127	0	2	0	0	0	3	3	0	0	0	0	0	0	0	0	3	3	0	0	18	1	0	1	3
0	28	0	2	54	0	1	1	3	36	52	33	130	2	1	4	2	0	0	0	0	0	0	0	0	1	4	2	0	0	0	1	21	1	0	5	6
0	30	1	4	12	0	11	3	1	36.7	79	15	118	1	2	1	0	0	0	4	0	0	0	0	0	0	1	0	0	4	0	0	17	1	0	2	4
0	23	0	4	23	0	2	3	1	36.5	89	17	108	0	2	0	0	0	0	3	0	0	0	0	0	0	0	0	0	3	0	0	9	0	0	1	3
0	58	5	2	20	0	1	1	3	36.5	90	17	155	2	0	5	1	0	0	0	0	0	0	0	0	0	5	1	0	0	0	0	26	1	0	3	3
0	25	0	2	16	0	2	1	3	36.8	104	21	137	2	1	5	0	0	1	0	0	0	0	0	0	1	5	0	1	0	0	1	27	1	0	5	6
1	62	0	2	4	0	0.5	1	0	37	78	27	104	2	2	4	0	0	3	0	0	0	0	0	0	0	4	0	3	0	0	0	25	1	1	4	6
0	56	3	5	8	0	2	1	1	37	67	20	91	0	0	0	0	0	0	0	0	0	0	0	3	1	0	0	0	0	3	1	10	0	0	2	2
0	46	0	2	7	27	1	1	1	36.7	89	31	76	2	1	4	2	0	3	0	0	0	0	0	3	1	4	2	3	0	3	1	34	1	0	7	8
0	54	1	2	14	0	2	3	3	36.5	75	17	149	1	0	4	2	0	0	0	0	0	2	0	0	0	4	2	0	2	0	0	24	1	0	2	2
1	62	0	2	30	0	2	1	1	36	72	17	145	2	1	4	0	0	2	0	0	0	0	0	2	1	4	0	2	0	2	1	24	1	0	3	4
0	45	2	3	0	0	1	1	0	35	50			3	2	4	0	0	5	0	0	0	0	0	0	0	4	0	5	0	0	0	41	1	1
0	35	0	2	68	0	1	1	3	36	65	15	146	2	0	4	1	0	0	0	0	0	0	0	0	0	4	1	0	0	0	0	17	1	0	3	3
0	24	1	4	2	0	1	1	0	37	120	20	128	0	2	1	0	0	3	4	0	2	2	0	3	0	1	0	3	4	3	0	34	1	1	3	5
1	44	1	2	0	0	0.5	0	0	35				3	0	5	1	0	0	0	0	0	0	0	0	1	5	1	0	0	0	1	27	1	1
0	31	0	1	0	0	1	1	1	36.3	75	18	136	0	0	1	3	0	2	0	0	0	0	0	0	0	1	3	2	0	0	0	14	0	0	1	1
0	85	0	2	78	38	1	1	1	37	97	20	99	1	2	3	0	0	3	3	0	0	0	0	0	0	3	0	3	3	0	0	27	1	0	3	5
0	45	0	4	12	0	2	1	3	36	114	25	89	0	2	0	0	0	0	4	0	0	0	0	2	0	0	0	0	4	2	0	20	1	0	5	7
0	35	0	3	31	0	1	1	1	36.7	105	15	115	0	2	0	0	0	3	3	0	0	0	0	0	0	0	0	3	3	0	0	18	1	0	2	4
0	31	0	4	0	0	1	1	0	37.5	115	27	85	1	2	1	0	0	0	5	0	0	0	0	0	0	1	0	0	5	0	0	26	1	1	6	8
0	35	0	2	28	0	2	1	3	36	71	17	133	1	0	5	2	0	0	0	0	0	0	0	0	1	5	2	0	0	0	1	30	1	0	2	2
0	42	0	2	26	0	3	1	3	36.9	90	20	143	0	0	4	1	0	0	0	0	0	0	0	0	0	4	1	0	0	0	0	17	1	0	1	1
0	24	1	2	49	0	0.5	1	2	37.2	56	24	123	3	1	5	2	0	3	0	0	0	0	0	0	1	5	2	3	0	0	1	38	1	0	5	6
0	55	0	4	35	0	1	1	1	36.5	86	20	101	0	0	0	0	0	0	3	0	0	0	2	3	0	0	0	0	3	3	0	18	1	0	1	1
0	50	0	2	4	0	1	1	0	38.9	134	15	228	3	0	5	0	2	0	0	0	0	0	2	0	0	5	0	0	0	2	0	29	1	1	11	11
0	60	0	2	24	0	1	1	2	36	94	17	120	2	0	4	0	0	0	0	0	0	0	0	0	1	4	0	0	0	0	1	17	1	0	3	3
0	69	0	3	9	0	2	1	1	36.8	78	20	130	0	2	0	0	0	4	0	0	0	0	0	0	1	0	0	4	0	0	1	17	1	0	1	3
0	41	0	5	0	0	1	1	4	37	88	20	106	0	0	0	0	0	0	0	0	0	0	0	3	1	0	0	0	0	3	1	10	0	0	1	1
0	82	5	2	0	0	1	2	2	36.5	96	20	188	1	0	4	1	0	0	0	0	0	0	0	0	0	4	1	0	0	0	0	17	1	0	2	2
1	39	0	2	106	0	1	1	1	37	149	20	88	1	1	3	0	0	0	3	0	0	0	0	3	1	3	0	0	3	3	1	27	1	0	6	7
0	35	3	2	0	0	0.5	1	0	36	20			3	2	4	0	0	4	4	0	0	0	0	0	0	4	0	4	4	0	0	48	1	1
0	86	5	2	18	0	2	1	3	36.6	136	18	172	2	0	4	0	0	0	0	0	0	0	0	3	0	4	0	0	0	3	0	25	1	0	6	6
0	65	5	2	12	0	2	1	3	37	75	17	140	0	0	4	1	0	0	0	0	0	0	0	0	0	4	1	0	0	0	0	17	1	0	1	1
0	35	0	3	22	22	1	1	3	37.2	89	20	110	0	2	0	2	0	4	0	0	0	0	2	0	0	0	2	4	0	2	0	24	1	0	1	3
0	44	0	2	15	0	1	1	1	36	86	17	135	1	0	3	2	0	0	0	0	2	2	0	0	1	3	2	2	2	0	1	17	1	0	2	2
1	43	0	5	66	0	2	1	1	36.8	66	19	125	0	0	0	0	0	0	0	0	0	0	0	3	1	0	0	0	0	3	1	10	0	0	1	1
0	52	0	3	0	0	1	1	1	37.2	72	20	128	0	0	1	0	0	3	0	0	0	0	0	0	0	1	0	3	0	0	0	10	0	0	1	1
0	19	0	2	4	0	1	1	3	37	64	15	142	0	0	4	2	0	0	0	0	0	0	2	0	1	4	2	0	0	2	1	24	1	0	1	1
0	24	1	4	13	0	4	1	1	36.8	69	20	132	0	0	0	0	0	0	0	0	0	3	0	0	1	0	0	0	3	0	1	10	0	0	1	1
0	60	1	5	5	0	2	1	1	37	90	20	152	0	0	0	0	0	0	0	0	0	0	2	3	1	0	0	0	0	3	1	10	0	0	1	1
0	33	6	2	8	0	2	1	3	37	85	16	125	0	0	2	2	3	0	0	0	0	0	0	0	1	3	2	0	0	0	1	14	0	0	1	1
1	66	5	5	18	0	2	1	1	36.8	78	20	154	0	0	0	0	0	0	0	0	0	0	0	3	1	0	0	0	0	3	1	10	0	0	1	1
0	69	0	2	24	0	2	1	1	36.8	108	20	108	0	0	3	0	0	0	0	0	0	0	0	3	0	3	0	0	0	3	0	18	1	0	2	2
0	23	6	5	15	0	2	1	1	36.8	86	20	127	0	0	0	0	0	0	2	0	0	0	0	3	0	0	0	0	2	3	0	13	0	0	1	1
0	28	1	2	17	0	1	1	3	36.8	82	18	131	0	0	4	0	0	0	0	0	2	2	0	0	0	4	0	2	2	0	0	24	1	0	1	1
0	58	0	2	5	0	1	1	1	36.8	98	18	196	0	0	3	0	0	0	0	0	0	0	2	0	1	3	0	0	0	2	1	14	0	0	1	1
0	57	0	3	16	0	4	1	1	37.2	78	20	136	0	1	0	0	0	3	0	0	0	0	2	0	0	0	0	3	0	2	0	13	0	0	1	2
0	53	0	1	0	0	2	1	1	36.8	82	20	170	0	0	1	3	0	0	0	0	0	0	0	0	0	1	3	0	0	0	0	10	0	0	1	1
1	75	0	5	0	0	1	1	4	37	97	18	111	0	0	0	0	0	0	0	0	0	0	0	3	1	0	0	0	0	3	1	10	0	0	1	1
0	39	0	2	22	0	2	1	1	36.5	62	19	128	0	2	4	0	0	3	2	0	0	0	2	3	0	4	0	3	2	3	0	34	1	0	1	3
1	58	0	2	27	0	1	1	1	37	86	20	120	0	0	1	0	0	0	0	4	0	0	0	3	0	4	0	0	0	3	0	25	1	0	1	1
0	62	0	5	27	0	1	1	1	37	99	20	142	0	0	0	0	0	0	0	0	0	0	0	3	1	0	0	0	0	3	1	10	0	0	1	1
0	47	5	5	8	0	2	1	1	36.8	70	20	134	0	0	0	0	0	0	0	0	0	0	0	3	1	0	0	0	0	3	1	10	0	0	1	1
0	48	0	1	16	0	3	1	1	37	90	20	114	0	1	1	3	0	2	0	0	0	0	0	0	0	1	3	2	0	0	0	14	0	0	1	2
0	39	0	2	14	0	1	1	3	37.1	89	18	161	0	1	4	1	0	1	0	0	0	0	0	0	0	4	1	1	0	0	0	18	1	0	1	2
1	65	5	5	8	0	4	1	1	36.8	76	20	124	0	0	0	0	0	0	0	0	0	0	2	3	1	0	0	0	0	3	1	10	0	0	1	1
0	51	0	5	0	0	1	1	4	37	104	20	135	0	0	0	0	0	0	0	0	0	0	0	3	1	0	0	0	0	3	1	10	0	0	2	2
1	26	1	4	29	0	2	1	3	37	86	20	132	0	0	0	0	0	2	0	0	0	3	0	3	0	0	0	2	3	3	0	22	1	0	1	1
0	67	0	5	20	0	1	1	1	36.8	76	19	130	0	0	0	0	0	0	0	0	0	0	0	3	1	0	0	0	0	3	1	10	0	0	1	1
1	49	0	3	0	0	2	1	2	37	71	15	150	0	0	0	0	0	0	0	0	3	0	0	0	1	0	0	3	0	0	1	10	0	0	1	1
0	81	5	5	22	0	1	1	1	36.8	69	15	151	0	0	0	0	0	0	0	0	0	0	0	3	1	0	0	0	0	3	1	10	0	0	1	1
0	54	0	2	18	0	3	1	3	37.3	83	20	138	0	0	4	1	1	0	0	0	0	0	0	0	0	4	1	0	0	0	0	17	1	0	1	1
0	22	1	2	4	0	2	1	1	36.8	86	18	150	0	0	0	1	0	0	0	5	0	0	0	0	0	5	1	0	0	0	0	26	1	0	1	1
0	61	1	2	21	0	2	3	1	36.8	109	18	154	0	0	0	0	0	0	0	2	0	0	2	0	0	2	0	0	0	2	0	8	0	0	2	2
0	44	0	5	17	0	1	1	1	36.8	73	19	126	0	0	0	0	0	0	0	0	0	0	0	3	1	0	0	0	0	3	1	10	0	0	1	1
1	76	5	4	0	0	1	1	2	36.5	98	20	141	0	0	0	0	0	0	0	0	2	3	0	0	0	0	0	2	3	0	0	13	0	0	1	1
1	36	0	5	6	0	2	1	1	36.8	79	20	121	0	0	0	0	0	0	0	0	0	0	0	3	1	0	0	0	0	3	1	10	0	0	1	1
0	76	0	3	12	0	4	1	3	37.2	105	20	130	0	1	0	0	0	4	0	0	0	0	2	0	0	0	0	4	0	2	0	20	1	0	2	3
0	41	0	4	21	0	1	1	1	36.8	92	20	146	0	0	0	0	0	0	0	0	0	3	0	3	0	0	0	0	3	3	0	18	1	0	1	1
1	42	0	1	8	0	1	1	3	36.7	80	18	156	0	0	2	3	0	0	0	0	0	0	0	1	1	2	3	0	0	1	1	14	0	0	1	1
1	64	5	5	10	0	3	1	1	37	78	20	122	0	0	0	0	0	0	0	0	0	0	0	3	1	0	0	0	0	3	1	10	0	0	1	1
0	29	0	3	14	0	0.5	1	1	37.2	88	20	126	0	2	0	0	0	3	0	0	0	0	2	0	0	0	0	3	0	2	0	13	0	0	1	3
0	65	0	3	11	0	3	1	1	37	80	20	137	0	1	1	0	0	3	0	0	0	0	0	0	0	1	0	3	0	0	0	10	0	0	1	2
0	78	5	2	0	0	1	1	1	36.5	80	21	120	0	1	3	0	0	1	0	0	0	0	0	0	0	3	0	1	0	0	0	10	0	0	2	3
1	66	0	3	12	0	2	1	1	36.8	72	20	152	0	1	0	0	0	3	0	0	0	0	0	1	0	0	0	3	0	1	0	10	0	0	1	2
0	53	1	2	16	0	12	1	3	38	75	20	138	0	1	4	0	0	0	0	0	0	2	0	2	1	4	0	0	2	2	1	24	1	0	1	2
1	16	1	2	2	0	2	1	3	36.3	93	18	120	0	1	1	1	0	0	0	0	0	0	0	0	1	1	1	0	0	0	1	3	0	0	1	2
0	55	5	2	2	0	2	1	1	37.3	95	24	155	0	0	3	0	0	0	0	0	0	0	0	0	1	3	0	0	0	0	1	10	0	0	2	2
0	71	1	2	0	0	1	1	4	36	68	24	168	1	0	4	1	0	0	0	0	0	0	0	0	0	4	1	0	0	0	0	17	1	0	3	3
0	81	5	2	3	0	1	1	0	36.5	86	31	123	2	0	5	1	0	0	0	0	0	0	0	0	0	5	1	0	0	0	0	26	1	1	5	5
0	55	5	3	5	0	4	1	3	37.2	75	20	120	0	2	1	1	0	3	0	0	0	0	2	0	0	1	1	3	0	2	0	14	0	0	1	3
0	23	2	4	20	0	3	1	1	36.8	65	20	129	1	1	0	0	0	3	0	0	0	4	0	0	0	0	0	3	4	0	0	25	1	0	2	3
0	23	1	3	17	0	0.5	1	1	36.7	76	15	98	0	2	0	0	0	3	3	0	0	0	0	0	0	0	0	3	3	0	0	18	1	0	2	4
1	48	5	2	10	0	3	3	3	37.2	84	18	142	0	1	3	0	0	1	0	0	0	0	0	0	1	3	0	1	0	0	1	11	0	0	1	2
0	46	6	4	11	0	10	3	1	37.5	78	18	142	0	1	0	0	0	0	3	0	0	0	0	0	1	0	0	0	3	0	1	10	0	0	1	2
0	30	1	3	16	0	2	1	1	37	88	20	148	0	1	0	0	0	3	0	0	2	2	3	3	0	0	0	3	2	3	0	22	1	0	1	2
0	66	5	2	4	0	1	1	3	37	72	15	156	1	0	3	1	0	0	0	0	0	0	0	0	1	3	1	0	0	0	1	11	0	0	2	2
1	30	1	5	23	0	2	1	1	37	73	20	134	0	0	0	0	0	0	0	0	0	0	0	3	1	0	0	0	0	3	1	10	0	0	1	1
1	17	0	5	15	0	9	1	1	37.8	110	21	114	0	0	1	2	0	0	0	0	0	0	2	3	1	1	2	0	0	3	1	14	0	0	3	3
0	27	0	5	7	0	2	1	1	37	79	20	130	0	0	0	0	0	0	0	0	0	0	0	3	1	0	0	0	0	3	1	10	0	0	1	1
1	46	6	3	15	0	2	1	1	37.3	102	20	120	0	2	1	0	0	3	0	0	0	0	0	0	0	1	0	3	0	0	0	10	0	0	2	4
1	25	0	2	0	0	1	1	1	36.5	89	20	127	0	0	3	1	0	0	0	0	0	0	0	1	0	3	1	0	0	1	0	11	0	0	1	1
0	41	0	5	0	0	1	1	1	36	105	20	116	0	1	1	0	0	1	1	0	0	0	0	3	0	1	0	1	1	3	0	11	0	0	2	3
0	59	6	3	15	0	3	1	1	36.8	94	20	150	0	0	1	0	0	0	0	0	3	0	0	0	0	1	0	3	0	0	0	10	0	0	1	1
0	47	1	2	10	0	2	1	3	36.5	76	20	152	0	0	2	0	2	0	0	2	2	0	0	0	0	2	0	2	0	0	0	8	0	0	1	1
0	38	1	3	14	6	1	1	1	36.7	90	15	130	0	2	0	0	0	3	3	0	0	0	0	0	0	0	0	3	3	0	0	18	1	0	1	3
0	50	0	2	0	0	1	1	2	36	61	17	113	0	0	3	2	0	0	0	0	0	0	0	1	0	3	2	0	0	1	0	14	0	0	1	1
0	40	0	2	18	0	1	1	3	36	72	17	142	1	1	3	0	0	0	0	0	0	2	0	0	1	3	0	0	2	0	1	14	0	0	2	3
0	63	1	5	5	0	2	1	3	36.8	66	19	119	0	1	2	0	0	1	0	0	0	0	3	3	0	2	0	1	0	3	0	14	0	0	1	2
0	46	0	4	3	0	3	1	3	36.8	69	20	120	0	1	0	0	0	0	0	0	2	3	0	2	0	0	0	2	3	2	0	17	1	0	1	2
1	49	0	2	1	0	1	1	0	36.2	122	33	92	3	2	5	2	0	3	0	0	0	0	0	0	0	5	2	3	0	0	0	38	1	1	9	11
1	74	5	5	2	0	12	1	2	36.8	75	19	160	0	0	0	0	0	0	0	0	0	0	0	3	1	0	0	0	0	3	1	10	0	0	1	1
0	41	0	5	13	0	1	1	1	36.8	75	19	132	0	0	0	0	0	0	0	0	0	0	0	3	1	0	0	0	0	3	1	10	0	0	1	1
0	74	0	2	10	0	3	1	3	36.6	72	14	210	0	1	4	0	1	3	0	3	0	0	0	0	0	4	0	3	0	0	0	25	1	0	2	3
1	46	5	5	9	0	2	1	1	36.8	75	13	130	0	0	0	0	0	0	0	0	0	0	3	0	1	0	0	0	0	3	1	10	0	0	0	0
0	43	6	4	0	0	1	1	2	36.8	90	20	148	0	0	0	0	0	0	0	0	0	2	0	0	1	0	0	0	2	0	1	5	0	0	1	1
0	72	5	2	10	0	2	1	2	37	70	20	147	0	0	4	0	0	0	0	0	3	0	0	0	0	4	0	3	0	0	0	25	1	0	1	1
0	60	1	2	16	0	0.5	1	1	37.2	88	17	131	0	2	3	0	0	0	3	0	0	2	0	0	0	3	0	0	3	0	0	18	1	0	1	3
0	40	1	2	31	0	2	1	3	36.5	55	27	127	3	0	5	1	0	0	0	0	0	0	0	0	0	5	1	0	0	0	0	26	1	0	5	5
0	34	1	4	21	0	2	1	1	37	80	20	145	0	0	0	0	0	0	0	0	0	3	0	0	1	0	0	0	3	0	1	10	0	0	1	1
0	60	5	5	8	0	2	1	1	36.8	63	19	110	0	0	2	0	0	0	0	0	0	0	0	3	0	2	0	0	0	3	0	13	0	0	1	1
1	66	0	3	31	31	3	1	2	37	115	20	110	0	2	2	0	0	3	0	0	2	2	0	3	0	2	0	3	2	3	0	22	1	0	3	5
0	48	6	3	25	0	3	1	1	36.8	60	20	115	0	2	0	0	0	3	0	0	0	2	0	1	0	0	0	3	2	1	0	14	0	0	1	3
0	26	0	3	16	0	2	1	1	36.8	97	20	141	0	1	0	0	0	3	3	0	0	2	0	3	0	0	0	3	3	3	0	27	1	0	1	2
0	51	0	2	27	0	0.5	1	3	36.8	55	20	141	1	0	5	2	0	0	0	0	0	0	0	0	0	5	2	0	0	0	0	29	1	0	2	2
0	65	1	2	51	0	1	1	3	37	50	20	107	2	1	5	2	0	2	0	2	0	0	0	0	0	5	2	2	0	0	0	33	1	0	4	5
0	48	1	2	3	0	2	1	3	36.9	79	20	157	0	0	3	0	0	1	0	0	0	0	0	0	0	3	0	1	0	0	0	10	0	0	1	1
0	55	1	2	25	0	0.5	1	1	36.7	90	15	95	0	2	3	0	0	3	3	0	0	3	0	0	0	3	0	3	3	0	0	27	1	0	2	4
0	43	0	5	14	0	2	1	1	36.8	62	19	123	0	0	0	0	0	0	0	0	0	0	0	3	1	0	0	0	0	3	1	10	0	0	1	1
0	28	0	5	12	0	2	1	1	36.8	80	19	118	0	0	0	0	0	0	0	0	0	0	3	0	1	0	0	0	0	3	1	10	0	0	1	1
1	28	1	4	15	0	3	1	1	36.8	81	19	136	0	0	0	0	0	0	0	0	0	3	0	2	0	0	0	0	3	2	0	13	0	0	1	1
0	50	6	5	16	0	2	1	1	37.2	73	20	141	0	1	0	0	0	1	0	0	0	2	1	3	1	0	0	1	2	3	1	14	0	0	1	2
0	49	0	2	20	0	1	1	1	37	89	20	150	0	2	3	0	0	0	3	0	0	0	0	2	0	3	0	0	3	2	0	22	1	0	1	3
1	49	0	3	7	0	4	1	1	37.2	72	18	157	0	2	0	0	0	3	0	0	0	0	1	0	0	0	0	3	0	1	0	10	0	0	1	3
1	84	5	5	23	0	2	1	1	37	80	20	154	0	0	0	0	0	0	0	0	0	0	0	3	1	0	0	0	0	3	1	10	0	0	1	1
1	47	1	2	7	0	1	1	1	37	80	20	154	0	0	0	0	0	0	0	3	0	0	0	0	1	3	0	0	0	0	1	10	0	0	1	1
0	85	0	3	16	0	2	1	1	37.1	88	20	171	0	2	0	0	0	3	2	0	2	2	2	0	0	0	0	3	2	2	0	17	1	0	1	3
0	80	5	2	10	0	2	1	1	37	72	17	165	0	0	4	1	0	0	0	0	0	0	0	0	0	4	1	0	0	0	0	17	1	0	1	1
0	30	0	4	9	0	2	1	1	37	108	20	92	0	2	0	0	0	0	3	0	0	0	0	3	0	0	0	0	3	3	0	18	1	0	3	5
0	87	5	2	3	0	1	1	2	36.8	73	22	152	1	1	4	1	0	0	0	0	0	0	0	0	0	4	1	0	0	0	0	17	1	0	3	4
1	84	5	5	13	0	2	1	1	36.8	108	20	170	0	0	1	0	0	0	0	0	0	0	0	3	1	1	0	0	0	3	1	11	0	0	2	2
0	45	0	2	23	0	1	1	3	36.6	72	24	108	2	0	5	0	0	2	0	0	0	0	0	2	0	5	0	2	0	2	0	33	1	0	4	4
1	50	1	5	12	0	2	1	1	37	55	20	125	0	1	0	1	0	2	0	0	0	0	0	3	0	0	1	2	0	3	0	14	0	0	1	2
0	50	1	2	6	0	2	1	2	36.8	55	20	128	0	0	1	1	0	0	0	3	0	0	0	0	0	3	1	0	0	0	0	10	0	0	1	1
0	42	1	2	18	0	24	1	1	37	84	20	100	0	0	3	2	0	0	0	0	0	2	0	0	0	3	2	0	2	0	0	17	1	0	2	2
0	29	1	5	43	0	1	1	1	36.8	107	20	150	0	0	0	0	0	0	0	0	0	0	3	3	1	0	0	0	0	3	1	10	0	0	2	2
0	46	5	5	15	0	3	1	3	36.5	89	20	151	0	1	1	2	0	0	1	0	0	0	0	3	0	1	2	0	1	3	0	14	0	0	1	2
1	59	0	3	8	0	4	1	1	37	75	20	157	0	1	0	0	0	3	1	0	0	0	0	0	0	0	0	3	1	0	0	10	0	0	1	2
0	63	0	3	7	0	4	1	1	37.2	75	20	165	0	1	0	0	0	4	1	0	0	0	0	0	0	0	0	4	1	0	0	17	1	0	1	2
0	17	1	3	25	7	3	1	1	36.4	122	22	89	1	1	1	0	0	4	0	0	3	2	0	3	0	1	0	4	2	3	0	29	1	0	6	7
0	40	0	2	5	0	1	3	0	37.2	107	25	104	3	1	4	2	0	3	0	2	2	0	0	0	0	4	2	3	0	0	0	29	1	1	6	7
1	48	6	2	8	0	2	1	3	37	67	17	141	0	0	2	1	0	0	0	0	2	2	0	0	0	2	1	2	2	0	0	12	0	0	1	1
1	95	5	5	0	0	1	1	2	36.8	80	15	140	0	0	0	0	0	0	0	0	2	2	0	3	0	0	0	2	2	3	0	17	1	0	1	1
0	56	0	3	24	0	1	1	1	37	72	24	116	0	2	0	0	0	3	0	0	0	2	0	3	0	0	0	3	2	3	0	22	1	0	2	4
1	62	0	5	0	0	1	1	4	36.2	71	20	115	0	0	0	0	0	0	0	0	0	0	3	0	1	0	0	0	0	3	1	10	0	0	1	1
0	17	0	1	2	0	1	1	2	37	93	20	138	0	0	0	3	0	0	0	0	2	2	0	0	0	0	3	2	2	0	0	17	1	0	1	1
1	50	0	4	0	0	1	1	2	37	71	20	112	0	0	0	0	0	0	3	0	0	0	0	0	1	0	0	0	3	0	1	10	0	0	1	1
0	26	0	5	0	0	1	1	1	37.2	88	22	141	0	0	0	0	0	0	0	0	0	0	0	4	1	0	0	0	0	4	1	17	1	0	2	2
0	60	1	5	15	0	1	1	1	37	98	20	115	0	0	0	0	0	0	0	0	0	0	2	3	0	0	0	0	0	3	0	9	0	0	1	1
0	47	1	3	11	0	2	1	1	36.8	93	24	139	1	2	0	2	0	3	0	0	0	0	2	0	0	0	2	3	0	2	0	17	1	0	3	5
0	30	1	2	11	0	1	1	3	37	92	20	147	0	0	2	1	0	0	0	3	0	0	0	0	0	3	1	0	0	0	0	10	0	0	1	1
0	42	6	2	7	0	0.5	1	3	37	83	15	161	0	0	3	2	0	0	0	0	0	0	0	0	0	3	2	0	0	0	0	13	0	0	1	1
0	50	0	2	0	0	0.5	1	0	35				3	0	5	1	0	0	0	0	0	0	0	0	0	5	1	0	0	0	0	26	1	1
0	68	5	5	18	0	1	1	1	36.8	90	20	171	0	0	1	0	0	0	0	0	0	0	0	3	0	1	0	0	0	3	0	10	0	0	1	1
1	48	0	2	27	0	1	1	3	37	74	20	165	1	0	3	1	0	0	0	0	0	0	0	0	0	3	1	0	0	0	0	10	0	0	2	2
0	46	0	3	17	0	3	1	1	37.2	89	20	126	0	2	0	0	0	4	0	0	0	0	1	0	0	0	0	4	0	1	0	17	1	0	1	3
0	22	6	3	0	0	1	1	4	37.2	112	22	123	1	1	2	0	0	3	0	0	0	0	0	0	0	2	0	3	0	0	0	13	0	0	5	6
0	83	0	2	11	0	2	1	3	37.3	67	22	197	0	1	3	2	0	2	0	0	0	0	0	0	1	3	2	2	0	0	1	17	1	0	2	3
0	54	1	5	19	0	2	1	3	37.2	97	18	126	0	0	2	1	1	0	0	0	0	0	3	0	1	2	1	0	0	3	1	14	0	0	1	1
0	78	0	5	0	0	1	1	2	37	94	20	129	0	0	0	0	0	0	0	0	0	0	0	3	1	0	0	0	0	3	1	10	0	0	1	1
0	42	0	2	10	0	1	1	2	37	63	22	118	3	0	5	2	0	0	0	0	0	0	0	0	0	5	2	0	0	0	0	29	1	0	5	5
1	46	0	3	29	0	1	1	1	36.8	78	19	86	0	1	0	2	0	3	0	0	0	0	2	3	0	0	2	3	0	3	0	22	1	0	2	3
0	73	0	2	15	0	1	1	1	36.7	80	18	133	0	1	3	0	1	3	0	0	0	0	2	0	0	3	0	3	0	2	0	22	1	0	1	2
1	70	5	5	9	0	24	1	3	37	80	20	141	0	0	0	0	0	0	0	0	0	0	0	3	1	0	0	0	0	3	1	10	0	0	1	1
1	69	0	3	9	0	2	1	3	37	86	17	141	0	0	2	0	0	3	0	2	0	0	1	0	0	2	0	3	0	1	0	14	0	0	1	1
0	50	1	2	26	0	6	1	1	36.8	69	14	138	0	1	0	0	0	2	0	3	0	0	0	1	0	3	0	2	0	1	0	14	0	0	0	1
0	76	0	2	26	0	4	1	3	37.2	97	18	179	0	0	4	2	0	0	0	0	0	0	0	0	0	4	2	0	0	0	0	20	1	0	1	1
0	65	6	3	0	0	2	1	4	37.1	176	22	108	0	2	0	0	0	4	1	0	0	0	0	0	0	0	0	4	1	0	0	17	1	0	5	7
0	46	1	5	5	0	2	1	1	36.5	101	20	129	0	0	0	0	0	0	0	0	0	0	0	3	1	0	0	0	0	3	1	10	0	0	2	2
0	46	6	3	0	0	1	1	4	37.2	78	21	136	0	2	0	0	0	3	0	0	2	3	0	3	0	0	0	3	3	3	0	27	1	0	2	4
0	70	0	3	36	0	1	1	3	37.5	76	20	174	0	1	0	0	0	3	0	0	0	2	2	0	2	0	0	3	2	2	2	17	1	0	1	2
0	28	0	1	16	0	24	1	1	37.1	90	19	126	0	0	0	3	0	0	0	0	0	0	0	0	1	0	3	0	0	0	1	10	0	0	1	1
1	70	0	2	16	0	1	1	1	37	74	15	160	0	0	4	2	0	3	0	0	0	0	1	2	0	4	2	3	0	2	0	29	1	0	1	1
0	50	6	5	37	5	2	1	1	37	98	30	90	1	1	0	2	0	0	2	0	0	2	0	3	1	0	2	0	2	3	1	17	1	0	5	6
0	47	6	3	9	0	3	1	3	37.2	75	20	120	0	1	1	0	0	3	0	0	2	2	0	0	0	1	0	3	2	0	0	14	0	0	1	2
0	44	1	2	20	0	1	1	1	37.2	84	20	130	0	1	4	0	0	1	0	0	0	3	0	0	0	4	0	1	3	0	0	26	1	0	1	2
1	31	0	5	27	0	1	1	3	36.7	90	19	132	0	0	2	2	0	0	0	0	0	0	3	0	1	2	2	0	0	3	1	17	1	0	1	1
0	64	1	2	4	0	1	1	1	37	60	20	166	0	0	0	1	0	0	0	4	0	0	0	0	0	4	1	0	0	0	0	17	1	0	1	1
1	46	6	3	7	0	1	1	1	37	77	20	138	0	0	0	0	0	0	0	0	3	0	1	0	0	0	0	3	0	1	0	10	0	0	1	1
0	87	5	2	0	0	1	1	0	37	84	20	147	3	0	5	1	0	0	0	0	0	0	0	0	0	5	1	0	0	0	0	26	1	1	4	4
0	37	0	4	39	15	0.5	1	1	36.7	120	8	60	1	2	1	0	0	0	3	0	0	0	2	3	1	1	0	0	3	3	1	19	1	0	8	10
0	48	6	3	0	0	1	1	4	36.2	84	22	110	0	1	0	1	0	0	0	0	2	2	2	2	0	0	1	2	2	2	0	12	0	0	2	3
0	52	5	3	15	0	5	1	1	36.8	62	20	151	0	0	0	0	0	0	0	0	3	2	0	0	0	0	0	3	2	0	0	13	0	0	1	1
0	55	1	4	11	0	1	1	1	37	78	19	151	0	0	0	0	0	0	0	0	0	3	0	1	0	0	0	0	3	1	0	10	0	0	1	1
0	36	5	2	0	0	1	1	2	36.8	108	18	118	0	0	3	1	1	0	0	0	0	0	0	0	0	3	1	0	0	0	0	10	0	0	2	2
0	58	3	5	25	0	2	1	1	37	70	20	60	0	2	1	0	0	0	3	0	0	0	0	4	0	1	0	0	3	4	0	26	1	0	4	6
0	32	6	5	0	0	1	1	4	36.2	75	22	113	0	0	1	0	0	0	0	0	0	0	0	3	1	1	0	0	0	3	1	11	0	0	2	2
0	43	0	2	0	0	1	1	4	36.5	86	18	221	0	0	3	1	0	0	0	0	0	0	0	0	0	3	1	0	0	0	0	10	0	0	3	3
0	47	0	2	25	0	1	1	1	37	87	18	143	1	1	4	0	0	2	0	0	0	0	0	0	0	4	0	2	0	0	0	20	1	0	2	3
1	61	0	2	21	0	2	1	1	36.6	100	18	179	0	1	3	0	0	3	0	0	0	0	0	3	1	3	0	3	0	3	1	27	1	0	1	2
0	58	0	3	9	0	2	3	3	37.3	92	18	132	0	1	1	0	1	1	0	0	3	0	0	0	1	1	0	3	0	0	1	11	0	0	1	2
0	45	5	3	0	0	1	1	4	36.8	87	18	219	0	0	0	0	0	0	0	0	3	2	0	0	0	0	0	3	2	0	0	13	0	0	3	3
0	49	5	5	3	0	2	1	1	36.8	96	19	115	0	0	1	0	0	0	0	0	0	0	3	0	1	1	0	0	0	3	1	11	0	0	1	1
1	63	0	5	23	0	2	1	1	36.8	98	20	156	1	0	0	0	0	0	0	0	0	2	0	3	0	0	0	0	2	3	0	13	0	0	2	2
1	53	0	3	14	0	2	1	1	36.8	78	20	128	0	2	0	0	0	3	0	0	0	0	2	0	0	0	0	3	0	2	0	13	0	0	1	3
0	70	0	2	2	0	0.5	1	0	37	121	31	90	3	2	5	0	0	2	1	0	0	0	0	3	0	5	0	2	1	3	0	38	1	1	9	11
0	82	0	2	102	37	4	1	1	37.1	120	16	85	1	2	3	0	0	3	3	0	0	0	2	3	3	3	0	3	3	3	3	27	1	0	5	7
0	46	0	3	15	0	1	1	1	37	74	20	184	0	0	1	0	0	3	0	0	0	0	0	0	0	1	0	3	0	0	0	10	0	0	1	1
0	33	0	3	13	0	2	1	3	37.2	73	20	143	0	1	1	2	0	3	0	0	0	0	0	1	0	1	2	3	0	1	0	14	0	0	1	2
1	79	0	3	19	0	3	1	1	37.2	89	20	182	0	2	1	0	0	4	0	0	0	0	0	0	0	1	0	4	0	0	0	17	1	0	1	3
0	53	0	3	12	0	2	1	1	36.7	77	18	130	0	2	0	0	0	3	1	0	0	0	0	0	0	0	0	3	1	0	0	10	0	0	1	3
0	45	0	4	7	0	1	1	1	36.8	88	19	130	0	0	1	0	0	0	3	0	0	0	0	0	0	1	0	0	3	0	0	10	0	0	1	1
0	29	0	2	7	0	1	1	3	37	98	17	141	0	0	2	0	0	0	0	0	0	2	0	0	1	2	0	0	2	0	1	9	0	0	1	1
0	34	0	5	12	0	3	1	1	37	110	20	165	0	0	0	0	0	0	0	0	0	0	0	3	1	0	0	0	0	3	1	10	0	0	2	2
1	46	0	1	7	0	1	1	1	36.8	80	20	157	0	0	0	3	1	0	0	0	0	0	2	0	0	1	3	0	0	2	0	14	0	0	1	1
0	37	0	2	22	0	10	1	3	36	80	17	104	1	0	4	1	0	0	0	0	0	0	0	0	1	4	1	0	0	0	1	18	1	0	2	2
0	53	1	5	11	0	2	1	1	37	71	20	116	0	0	1	0	0	0	0	0	0	0	0	3	0	1	0	0	0	3	0	10	0	0	1	1
0	50	0	2	25	0	2	1	3	37	78	16	123	2	0	5	0	0	0	0	0	0	0	0	0	1	5	0	0	0	0	1	26	1	0	3	3
0	51	1	4	11	0	0.5	1	3	36.7	77	15	144	0	1	1	2	0	0	3	0	0	0	0	0	0	1	2	0	3	0	0	14	0	0	1	2
0	46	2	5	1	0	2	1	0	36.3	76	22	123	0	0	0	0	0	0	0	0	0	2	0	5	0	0	0	0	2	5	0	29	1	1	2	2
1	48	0	3	17	0	5	1	1	37.2	86	20	166	0	2	1	0	0	4	0	0	2	2	2	0	0	1	0	4	2	2	0	24	1	0	1	3
1	48	0	3	0	0	1	1	0	35	140	33		2	2	2	0	0	4	3	0	0	0	0	0	0	2	0	4	3	0	0	29	1	1
0	16	0	3	78	22	5	1	1	36.5	154	20	116	0	1	3	2	0	4	0	0	0	0	0	3	0	3	2	4	0	3	0	34	1	0	4	5
1	59	0	2	18	0	2	1	3	37.4	88	20	168	0	1	4	2	0	0	0	0	0	0	2	3	0	4	2	0	0	3	0	29	1	0	1	2
0	52	0	5	10	0	2	1	1	37	98	20	225	0	0	0	0	0	0	0	0	0	0	3	0	1	0	0	0	0	3	1	10	0	0	3	3
1	25	0	5	11	0	2	1	1	36.8	89	20	125	0	0	0	0	0	0	0	0	0	0	2	3	1	0	0	0	0	3	1	10	0	0	1	1
0	64	0	2	14	0	1	1	1	37.2	124	32	124	1	0	3	1	0	0	0	0	0	0	0	0	0	3	1	0	0	0	0	10	0	0	6	6
0	54	0	2	0	0	0.5	1	0	35				3	1	5	1	0	0	0	0	0	0	0	0	0	5	1	0	0	0	0	26	1	1
0	58	0	2	20	0	1	1	1	36.5	85	18	143	0	2	3	0	0	2	0	0	0	0	2	0	0	3	0	2	0	2	0	17	1	0	1	3
1	56	0	5	0	0	1	1	1	37	84	18	184	2	0	0	0	0	0	0	0	0	0	0	3	1	0	0	0	0	3	1	10	0	0	3	3
0	35	1	2	14	0	2	1	3	36.5	76	18	130	0	1	4	1	0	0	0	0	0	0	0	0	0	4	1	0	0	0	0	17	1	0	1	2
0	43	1	3	10	0	3	1	1	36.7	57	15	98	0	2	0	0	0	3	2	0	0	2	0	3	0	0	0	3	2	3	0	22	1	0	2	4
0	51	0	5	17	0	2	1	1	36.8	89	19	156	0	0	0	0	0	0	0	0	0	0	0	3	1	0	0	0	0	3	1	10	0	0	1	1
0	54	1	2	6	0	48	1	3	37	80	16	131	0	0	3	1	0	0	0	0	0	0	0	0	0	3	1	0	0	0	0	10	0	0	1	1
1	60	0	3	7	0	5	1	1	36.8	71	20	187	0	2	2	0	0	3	0	0	0	0	1	0	0	2	0	3	0	1	0	14	0	0	1	3
1	92	5	2	0	0	2	1	1	36.5	102	20	157	0	0	3	1	0	0	0	0	0	0	0	0	0	3	1	0	0	0	0	10	0	0	2	2
0	79	5	5	8	0	3	1	3	37	93	20	146	0	0	0	0	0	0	0	0	0	0	0	3	1	0	0	0	0	3	1	10	0	0	1	1
0	43	1	5	9	0	1	1	1	36.8	97	20	144	0	0	0	0	0	0	0	0	0	0	0	3	1	0	0	0	0	3	1	10	0	0	1	1
0	63	0	5	9	0	2	1	1	36.8	85	20	130	0	0	0	0	0	0	0	0	0	0	0	3	1	0	0	0	0	3	1	10	0	0	1	1
1	53	0	3	75	0	1	1	0	35	35		124	3	0	3	0	0	5	0	0	0	0	0	0	0	3	0	5	0	0	0	34	1	1
1	21	1	5	10	0	2	1	1	36.8	103	20	127	1	0	1	0	0	0	0	0	0	0	0	3	0	1	0	0	0	3	0	10	0	0	3	3
1	63	0	5	10	0	1	1	4	36.8	100	20	146	1	0	0	1	0	0	0	0	0	0	0	3	0	0	1	0	0	3	0	10	0	0	2	2
0	53	5	4	9	0	1	1	1	36.8	75	20	192	0	0	0	0	0	0	0	0	0	3	0	0	1	0	0	0	3	0	1	10	0	0	1	1
0	48	1	2	25	0	1	1	0	36.5	51	33	201	3	0	5	1	0	0	0	0	0	0	0	0	0	5	1	0	0	0	0	26	1	1	8	8
1	66	5	5	9	0	2	1	1	36.6	63	20	185	0	0	1	0	0	0	0	0	0	0	3	0	0	1	0	0	0	3	0	10	0	0	1	1
1	62	0	5	11	0	1	1	3	37	61	20	136	0	0	1	1	0	0	0	0	0	0	3	0	0	1	1	0	0	3	0	11	0	0	1	1
0	38	5	5	9	0	4	1	1	37	81	20	136	0	0	0	0	0	0	0	0	0	0	3	0	1	0	0	0	0	3	1	10	0	0	1	1
1	44	0	5	9	0	3	1	1	37	96	20	157	0	0	1	0	0	0	0	0	0	0	3	0	0	1	0	0	0	3	0	10	0	0	1	1
0	45	5	5	9	0	2	1	1	37	78	20	154	0	0	1	0	0	0	0	0	0	0	0	3	0	1	0	0	0	3	0	10	0	0	1	1
0	74	0	2	25	0	3	1	1	36.8	100	20	130	0	2	4	0	0	4	0	0	0	0	0	0	0	4	0	4	0	0	0	32	1	0	1	3
1	51	0	3	20	0	3	1	1	36.8	56	20	94	0	2	0	0	0	4	3	0	0	2	2	2	0	0	0	4	3	2	0	29	1	0	2	4
0	34	1	5	9	0	4	1	3	36.8	75	19	146	0	0	0	0	0	0	0	0	0	0	0	3	1	0	0	0	0	3	1	10	0	0	1	1
1	30	5	5	9	0	2	1	1	37	80	20	130	0	0	0	0	0	0	0	0	0	0	3	0	1	0	0	0	0	3	1	10	0	0	1	1
1	36	1	2	13	0	1	1	3	37	96	17	142	0	0	3	1	0	0	0	0	0	2	0	0	0	3	1	0	2	0	0	14	0	0	1	1
1	85	0	5	9	0	1	1	1	37	80	20	100	0	0	1	0	0	0	0	0	0	0	0	3	0	1	0	0	0	3	0	10	0	0	2	2
1	67	5	2	25	0	3	1	3	37.8	104	18	101	0	1	4	0	0	4	0	0	0	0	0	0	0	4	0	4	0	0	0	32	1	0	2	3
1	54	0	3	29	11	0.5	1	1	36.7	116	15	106	0	2	0	0	0	3	3	0	0	0	2	0	0	0	0	3	3	2	0	22	1	0	3	5
0	42	0	4	13	0	2	1	1	37	114	20	84	1	2	1	0	0	0	3	0	0	0	0	0	0	1	0	0	3	0	0	10	0	0	5	7
0	60	1	4	9	0	6	1	1	37	77	20	126	0	0	0	0	0	0	0	0	0	3	0	0	1	0	0	0	3	0	1	10	0	0	1	1
1	57	0	2	18	0	1	1	3	37	89	15	166	0	1	4	1	0	0	0	0	0	0	0	0	0	4	1	0	0	0	0	17	1	0	1	2
0	50	5	5	9	0	2	1	1	36.8	86	20	103	0	0	0	0	0	0	0	0	0	0	0	3	1	0	0	0	0	3	1	10	0	0	1	1
0	47	0	5	25	0	24	1	1	36.8	116	19	88	0	0	0	0	0	0	0	0	0	0	0	4	2	0	0	0	0	4	2	20	1	0	4	4
1	26	0	2	25	0	1	1	3	36.5	49	17	114	2	0	5	2	0	0	0	0	0	0	0	0	0	5	2	0	0	0	0	29	1	0	4	4
0	40	0	1	9	0	1	1	3	37	90	17	160	0	0	2	3	0	0	0	0	0	0	0	0	1	2	3	0	0	0	1	14	0	0	1	1
0	56	1	2	12	0	3	1	3	37	74	20	120	0	0	0	2	0	0	0	2	2	0	2	0	0	2	2	2	0	2	0	12	0	0	1	1
0	46	0	3	25	0	7	1	1	36	80	20	170	0	2	0	0	0	3	0	0	0	0	0	3	0	0	0	3	0	3	0	18	1	0	1	3
0	66	0	5	9	0	3	1	1	37	76	20	150	0	0	0	0	0	0	0	0	0	0	0	3	1	0	0	0	0	3	1	10	0	0	1	1
0	61	0	3	34	0	2	1	1	36.8	79	20	127	1	1	0	0	0	3	0	0	0	0	0	3	0	0	0	3	0	3	0	18	1	0	2	3
1	58	0	2	17	0	2	1	3	36.5	74	20	168	0	1	3	0	0	0	2	0	0	2	0	0	1	3	0	0	2	0	1	14	0	0	1	2
0	44	1	4	9	0	2	1	2	37	79	20	177	0	0	0	1	0	0	0	0	0	3	0	0	0	0	1	0	3	0	0	10	0	0	1	1
0	25	0	2	27	0	4	1	3	37.3	130	16	84	1	0	3	0	0	0	0	0	0	0	3	0	0	3	0	0	0	3	0	18	1	0	6	6
0	45	0	2	38	0	1	1	0	35	55	25	126	3	1	5	0	0	2	0	0	0	2	2	2	0	5	0	2	2	2	0	33	1	1	5	6
0	29	1	3	22	0	2	1	1	37.2	80	20	115	0	1	0	0	0	3	0	2	2	3	0	2	0	2	0	3	3	2	0	22	1	0	1	2
0	51	0	3	25	0	2	1	1	37.5	87	20	138	0	2	0	0	0	3	0	0	0	0	0	3	0	0	0	3	0	3	0	18	1	0	1	3
1	86	5	5	9	0	1	1	1	37	98	17	165	0	0	0	0	0	0	0	0	0	0	0	3	1	0	0	0	0	3	1	10	0	0	1	1
0	79	5	5	6	0	2	1	1	36.8	99	20	186	0	0	0	1	0	0	0	0	0	0	0	3	0	0	1	0	0	3	0	10	0	0	1	1
0	67	5	5	9	0	1	1	2	37	72	20	130	0	0	0	0	0	0	0	0	0	0	0	3	1	0	0	0	0	3	1	10	0	0	1	1
0	45	0	2	36	0	1	1	1	37	89	16	136	1	2	4	0	0	3	0	0	0	0	2	0	0	4	0	3	0	2	0	29	1	0	2	4
1	81	5	5	9	0	1	1	4	36.8	88	16	169	0	0	0	0	0	0	0	0	0	0	0	3	1	0	0	0	0	3	1	10	0	0	1	1
0	69	0	5	9	0	1	1	2	37.2	89	20	144	0	0	0	0	0	0	0	0	0	0	0	3	1	0	0	0	0	3	1	10	0	0	1	1
1	45	5	5	9	0	2	1	3	36.5	89	20	144	0	0	0	0	0	0	0	0	0	0	0	3	1	0	0	0	0	3	1	10	0	0	1	1
0	29	1	5	9	0	2	1	1	37	90	20	126	0	0	0	0	0	0	0	0	0	0	2	3	1	0	0	0	0	3	1	10	0	0	1	1
0	66	0	3	11	0	1	1	1	36.8	71	20	148	0	0	1	0	0	0	0	0	2	0	0	0	0	1	0	2	0	0	0	5	0	0	1	1
0	43	0	4	9	0	4	1	1	36.7	89	15	113	0	2	1	0	0	0	3	0	0	0	0	0	0	1	0	0	3	0	0	10	0	0	1	3
0	29	0	5	9	0	1	1	1	37	89	16	167	0	0	0	0	0	1	0	0	0	0	3	0	0	0	0	1	0	3	0	10	0	0	1	1
0	56	3	5	8	0	24	1	1	36.9	124	20	104	0	0	1	0	0	0	0	0	0	0	3	0	0	1	0	0	0	3	0	10	0	0	3	3
1	53	1	3	29	0	5	1	1	36.7	110	15	92	0	2	0	0	0	4	4	0	2	2	0	0	0	0	0	4	4	0	0	32	1	0	3	5
0	59	1	2	25	0	2	1	2	36.5	120	27	83	3	2	5	2	0	0	0	0	0	0	0	0	0	5	2	0	0	0	0	29	1	0	8	10
0	20	0	2	29	0	8	1	1	37	75	20	135	0	1	4	0	0	3	0	0	0	2	0	0	0	4	0	3	2	0	0	29	1	0	1	2
0	37	3	2	13	0	1	1	1	37	90	20	126	0	2	3	1	0	0	0	0	0	0	0	0	0	3	1	0	0	0	0	10	0	0	1	3
0	83	1	2	16	0	5	1	3	37.3	115	27	125	2	0	4	0	0	0	0	0	0	0	0	0	1	4	0	0	0	0	1	17	1	0	6	6
0	70	5	3	20	0	6	1	1	37	88	21	140	0	2	0	0	0	4	0	0	0	0	2	0	0	0	0	4	0	2	0	20	1	0	2	4
0	38	2	2	16	0	1	1	3	37.5	64	20	116	0	0	4	1	0	0	0	0	0	0	0	0	0	4	1	0	0	0	0	17	1	0	1	1
0	33	6	2	16	0	2	1	3	36.5	89	15	135	1	0	4	1	0	0	0	0	0	0	0	0	0	4	1	0	0	0	0	17	1	0	2	2
0	45	1	2	29	0	1	1	3	37.2	112	21	136	1	2	4	1	0	3	0	0	2	0	2	0	0	4	1	3	0	2	0	29	1	0	5	7
0	43	1	3	9	0	2	1	1	36.5	85	16	130	0	0	0	2	0	3	0	0	0	0	0	0	0	0	2	3	0	0	0	13	0	0	1	1
1	30	0	3	22	7	0.5	1	3	37	130	15	85	0	2	3	2	0	4	3	2	0	0	2	0	0	3	2	4	3	2	0	34	1	0	5	7
0	90	0	2	27	0	1	1	0	38.2	57	20	128	1	1	5	1	0	0	0	0	0	0	0	1	0	5	1	0	0	1	0	27	1	1	2	3
0	66	0	2	30	0	2	1	3	37.3	125	34	121	2	0	5	2	0	0	0	0	0	0	0	0	1	5	2	0	0	0	1	30	1	0	7	7
0	29	2	3	27	0	1	1	0	36.5	138	32	100	1	2	0	1	0	4	0	0	2	0	0	0	0	0	1	4	0	0	0	17	1	1	8	10
1	76	0	2	20	0	0.5	1	4	35	76	27	124	1	2	4	2	0	0	0	0	0	0	0	0	0	4	2	0	0	0	0	20	1	0	3	5
0	60	0	5	4	0	0.5	1	4	36	107	21	104	0	0	1	0	0	0	0	0	0	0	3	3	0	1	0	0	0	3	0	10	0	0	3	3
1	33	0	4	34	0	0.5	1	1	37	140	20	89	1	2	3	2	0	2	4	0	0	2	0	0	0	3	2	2	4	0	0	29	1	0	6	8
0	35	6	2	75	0	1	1	0	35				3	0	5	1	0	0	0	0	0	0	0	0	0	5	1	0	0	0	0	26	1	1
0	79	5	2	10	0	2	1	3	37.3	90	16	85	0	0	3	0	0	0	0	0	0	0	0	0	1	3	0	0	0	0	1	10	0	0	2	2
1	26	0	2	33	0	3	1	3	36.7	82	18	116	2	1	5	0	0	2	0	0	0	2	0	2	1	5	0	2	2	2	1	33	1	0	3	4
0	31	0	2	20	0	3	1	3	36.8	72	20	140	1	0	4	2	0	0	0	0	0	0	0	0	0	4	2	0	0	0	0	20	1	0	2	2
1	30	3	3	17	0	1	1	1	36.8	135	22	100	0	1	0	0	0	4	0	0	0	0	0	0	1	0	0	4	0	0	1	17	1	0	6	7
0	30	3	3	75	0	0.5	1	0	35				3	2	3	0	0	5	0	0	0	0	0	0	0	3	0	5	0	0	0	34	1	1
1	57	0	2	29	17	6	3	3		114	34		3	2	3	0	0	3	0	0	0	0	2	0	0	3	0	3	0	2	0	22	1	0
0	53	3	4	16	0	2	1	1	37	111	20	93	0	2	1	0	0	0	4	0	0	0	0	0	0	1	0	0	4	0	0	17	1	0	4	6
0	41	1	3	12	0	10	3	3	37.3	86	19	115	1	0	1	0	0	3	0	0	2	2	0	2	3	1	0	3	2	2	3	22	1	0	2	2
0	26	0	2	36	0	0.5	1	0	36.8	132	18	89	3	2	5	0	0	0	3	0	0	0	2	0	0	5	0	0	3	2	0	38	1	1	8	10
1	50	0	5	20	0	2	1	1	37	58	23	114	0	0	0	0	0	0	0	0	0	2	0	3	0	0	0	0	2	3	0	13	0	0	2	2
1	56	0	5	10	0	5	1	1	37	80	20	120	0	0	1	0	0	0	0	0	0	2	0	3	0	1	0	0	2	3	0	14	0	0	1	1
1	32	6	4	25	0	1	1	3	37	120	20	120	0	2	1	0	0	0	3	0	0	0	0	0	0	1	0	0	3	0	0	10	0	0	3	5
0	28	0	2	20	0	1	1	0	37.2	95	15	160	2	0	5	0	0	3	0	0	0	0	0	0	1	5	0	3	0	0	1	35	1	1	3	3
0	36	0	2	26	0	3	1	0	37	34	15	110	3	0	5	1	0	0	0	0	0	0	0	0	0	5	1	0	0	0	0	26	1	1	6	6
0	51	0	5	13	0	4	1	1	37	69	20	102	0	0	1	0	0	0	0	0	0	2	0	3	1	1	0	0	2	3	1	14	0	0	1	1
1	70	0	5	16	0	6	1	1	38	86	20	137	0	0	0	0	0	0	0	0	0	0	2	3	2	0	0	0	0	3	2	13	0	0	1	1
1	62	6	2	17	0	4	1	3	37.5	80	20	120	0	0	4	0	0	2	0	0	0	2	0	0	0	4	0	2	2	0	0	24	1	0	1	1
0	51	1	2	38	0	2	1	3	37	60	20	133	2	0	5	2	0	2	0	0	0	0	0	0	0	5	2	2	0	0	0	33	1	0	3	3
1	55	1	2	25	0	2	1	1	36.7	98	20	117	0	1	3	2	0	3	0	0	0	0	2	0	0	3	2	3	0	2	0	22	1	0	1	2
0	45	1	2	29	0	1	1	0	36.5	64	27	173	3	0	5	0	0	0	0	0	0	0	0	4	0	5	0	0	0	4	0	41	1	1	5	5
1	53	0	5	16	15	2	1	1	36.8	125	25	86	1	0	0	0	0	0	0	0	0	0	0	4	0	0	0	0	0	4	0	16	1	0	6	6
0	47	1	2	16	0	5	1	1	36.8	103	18	119	0	0	0	0	0	0	0	4	2	0	0	0	0	4	0	2	0	0	0	20	1	0	2	2
1	90	0	2	22	0	1	1	0	36.5	101	27	186	0	2	5	0	5	5	0	0	0	0	0	0	0	5	0	5	0	0	0	50	1	1	3	5
1	28	0	4	41	0	4	1	0	36.8	65	31	150	2	2	3	0	0	3	4	0	0	0	0	3	0	3	0	3	4	3	0	34	1	1	5	7
0	36	3	2	9	0	0.5	1	1	37	80	16	130	0	0	1	0	3	0	0	0	0	0	0	0	1	3	0	0	0	0	1	10	0	0	1	1
0	36	0	5	16	0	2	1	3	37.1	66	20	86	0	0	0	0	0	0	0	0	0	0	0	3	1	0	0	0	0	3	1	10	0	0	2	2
0	58	5	3	16	12	3	1	1	37	88	21	140	0	2	1	0	0	4	0	0	0	0	0	0	0	1	0	4	0	0	0	17	1	0	2	4
0	35	0	4	18	13	1	1	1	36.8	101	12	98	0	2	0	0	0	0	3	0	0	0	0	3	1	0	0	0	3	3	1	19	1	0	2	4
1	50	0	2	38	0	2	1	0	36.8	78	15	138	2	1	5	0	0	2	0	0	0	0	0	2	0	5	0	2	0	2	0	33	1	1	3	4
0	78	5	2	22	0	1	1	2	36.8	67	24	189	2	0	5	1	0	0	0	0	0	0	0	0	0	5	1	0	0	0	0	26	1	0	4	4
0	45	6	2	13	0	6	3	3	36.8	90	18	167	0	1	3	2	1	0	0	0	0	0	0	0	1	3	2	0	0	0	1	14	0	0	1	2
0	27	1	5	0	0	0.5	3	4	36.8	97	20	95	0	2	0	1	0	0	0	0	0	0	3	0	0	0	1	0	0	3	0	10	0	0	2	4
1	47	3	2	9	0	4	1	3	36.5	80	20	88	0	0	3	2	0	0	0	0	0	0	0	0	0	3	2	0	0	0	0	13	0	0	2	2
1	19	1	3	1	0	0.5	1	0	35	131	44	286	2	2	0	0	0	4	4	0	0	0	2	0	0	0	0	4	4	2	0	36	1	1	10	12
0	27	2	3	168	5	1	1	3	37	120	22	85	0	2	0	0	0	3	3	0	0	0	0	0	0	0	0	3	3	0	0	18	1	0	5	7
1	43	0	2	19	4	3	3	1	37	85	20	120	1	2	3	2	0	3	3	0	2	0	0	0	0	3	2	3	3	0	0	27	1	0	2	4
0	56	0	5	1	1	0.5	1	0	37	130	20	105	1	2	0	0	0	0	3	0	0	0	0	5	0	0	0	0	3	5	0	34	1	1	5	7
0	69	0	2	36	0	2	1	3	37.1	55	14	118	2	1	5	0	0	1	0	0	0	0	0	0	0	5	0	1	0	0	0	26	1	0	2	3
0	66	5	2	6	0	1	1	3	36.8	78	20	132	0	0	3	1	0	0	0	0	0	0	0	0	0	3	1	0	0	0	0	10	0	0	1	1
1	45	1	3	17	0	3	3	1	36.8	122	22	108	1	2	2	2	0	3	2	0	0	0	2	2	1	2	2	3	2	2	1	17	1	0	5	7
0	50	1	2	21	0	1	1	1	36.8	96	20	116	0	0	3	2	0	0	0	0	0	0	2	0	0	3	2	0	0	2	0	17	1	0	1	1
0	54	0	2	26	13	3	1	1	36.5	106	20	126	0	2	3	2	0	3	0	0	0	0	3	3	0	3	2	3	0	3	0	27	1	0	2	4
0	51	1	5	31	0	2	1	1	37	70	19	135	0	0	0	0	0	0	0	0	0	0	3	4	1	0	0	0	0	4	1	17	1	0	1	1
0	60	0	3	8	0	3	1	1	37	88	21	140	0	1	0	0	0	3	0	0	0	0	0	0	1	0	0	3	0	0	1	10	0	0	2	3
0	51	0	2	7	0	3	1	3	37	80	20	140	0	2	3	2	0	0	0	0	0	0	2	0	0	3	2	0	0	2	0	17	1	0	1	3
0	50	5	3	5	0	4	1	1	37	78	21	140	0	1	1	0	0	3	0	0	0	0	0	0	0	1	0	3	0	0	0	10	0	0	2	3
0	60	0	3	21	0	3	1	1	37	88	21	140	0	1	1	0	2	4	0	2	2	0	0	0	1	2	0	4	0	0	1	21	1	0	2	3
0	50	3	3	7	0	2	2	1	37	99	21	88	0	2	0	0	0	3	0	0	0	0	0	0	1	0	0	3	0	0	1	10	0	0	3	5
0	80	5	3	6	0	48	1	1	37	88	21	140	0	1	1	0	0	3	0	0	0	0	0	0	0	1	0	3	0	0	0	10	0	0	2	3
1	75	5	5	54	44	2	1	2	36.7	72	18	177	0	1	0	0	0	0	0	0	2	2	0	3	0	0	0	2	2	3	0	17	1	0	1	2
0	66	6	3	7	0	8	1	1	37	88	21	140	0	2	0	0	0	3	0	0	0	2	0	0	0	0	0	3	2	0	0	13	0	0	2	4
0	63	0	3	15	0	3	1	1	37	88	21	140	0	1	0	0	0	3	0	0	0	0	2	0	0	0	0	3	0	2	0	13	0	0	2	3
0	47	0	4	13	0	2	1	1	37	105	20	100	0	2	0	0	0	0	4	0	0	0	0	0	1	0	0	0	4	0	1	17	1	0	3	5
0	32	2	4	12	0	2	1	1	37	78	20	97	0	2	0	0	0	3	4	0	0	0	0	0	0	0	0	3	4	0	0	25	1	0	2	4
0	48	0	3	35	0	5	1	1	37	78	20	120	0	2	0	0	0	3	0	0	0	0	0	2	0	0	0	3	0	2	0	13	0	0	1	3
1	48	0	3	10	0	3	1	1	36.7	88	20	135	0	1	0	0	0	3	0	0	0	0	0	0	1	0	0	3	0	0	1	10	0	0	1	2
1	60	0	2	16	0	2	3	3	37	74	20	128	0	0	3	0	0	0	0	0	0	0	0	0	1	3	0	0	0	0	1	10	0	0	1	1
0	20	0	2	10	0	10	3	3	36.8	87	20	140	2	0	4	2	0	0	0	0	0	0	2	0	1	4	2	0	0	2	1	24	1	0	3	3
0	61	0	3	17	0	24	1	1	37	78	21	140	0	2	0	1	0	3	0	0	0	0	2	0	0	0	1	3	0	2	0	14	0	0	2	4
0	37	0	4	13	0	1	1	1	37.8	90	20	105	0	2	0	0	0	1	4	0	0	0	0	0	0	0	0	1	4	0	0	17	1	0	1	3
0	30	2	5	20	0	2	1	1	37	90	20	101	0	0	0	0	0	0	1	0	0	0	0	3	0	0	0	0	1	3	0	10	0	0	1	1
0	72	0	5	36	0	8	1	1	37	80	22	162	0	1	0	1	0	1	0	0	0	2	0	3	0	0	1	1	2	3	0	14	0	0	2	3
0	52	0	3	13	0	2	1	3	37	85	14	129	0	1	1	0	0	3	2	0	0	0	0	1	0	1	0	3	2	1	0	14	0	0	0	1
1	82	1	3	1	1	3	3	2	37	103	21	128	1	2	2	0	1	4	1	2	2	2	1	1	0	2	0	4	2	1	0	24	1	0	4	6
1	61	0	5	25	0	4	1	1	37	82	20	120	0	1	2	1	0	2	0	0	0	0	2	3	0	2	1	2	0	3	0	17	1	0	1	2
0	50	5	3	11	0	72	3	3	37	78	21	120	0	1	0	0	0	3	1	0	0	0	0	0	0	0	0	3	1	0	0	10	0	0	2	3
0	46	0	3	16	0	10	1	3	37	78	21	120	0	1	1	0	0	3	1	0	0	0	2	0	0	1	0	3	1	2	0	14	0	0	2	3
0	50	0	3	26	6	4	1	1	37.8	146	20		3	2	0	2	0	4	4	0	2	2	2	0	0	0	2	4	4	2	0	36	1	0
0	62	0	2	15	0	7	3	3	36	110	18	200	1	0	4	1	0	0	0	0	0	0	0	0	0	4	1	0	0	0	0	17	1	0	5	5
0	63	0	3	9	0	5	1	1	37	88	21	140	0	1	0	0	0	3	1	0	0	0	0	0	0	0	0	3	1	0	0	10	0	0	2	3
0	56	2	4	132	38	2	2	3	37	86	20	87	0	0	0	0	0	0	0	0	0	5	0	3	0	0	0	0	5	3	0	34	1	0	2	2
0	72	0	2	49	0	2	3	3	37.3	71	12	164	1	0	4	2	0	0	0	0	0	0	0	0	1	4	2	0	0	0	1	21	1	0	1	1
1	38	0	3	20	0	3	1	1	37	80	20	120	0	0	0	0	0	4	0	0	0	0	2	0	0	0	0	4	0	2	0	20	1	0	1	1
0	60	0	3	24	0	6	1	1	37	88	21	140	0	1	1	0	0	4	0	0	0	0	0	0	0	1	0	4	0	0	0	17	1	0	2	3
0	59	0	3	9	0	72	3	1	37	78	20	120	0	1	0	0	1	3	0	0	0	0	0	0	0	1	0	3	0	0	0	10	0	0	1	2
0	36	2	2	35	0	1	3	3	37	77	15	137	2	2	4	0	0	0	0	0	0	0	2	0	0	4	0	0	0	2	0	20	1	0	3	5
0	27	0	2	11	0	6	1	3	37.3	80	20	106	0	0	3	2	0	0	0	0	0	0	0	0	1	3	2	0	0	0	1	14	0	0	1	1
0	83	0	3	14	0	2	1	1	37	88	21	140	0	1	0	0	0	3	0	0	0	0	2	0	0	0	0	3	0	2	0	13	0	0	2	3
0	70	0	2	24	0	1	1	3	36.5	74	20	144	0	0	4	2	0	0	0	0	0	0	2	0	0	4	2	0	0	2	0	24	1	0	1	1
0	47	2	5	26	0	2	1	1	36.7	95	17	130	0	0	0	0	0	0	0	0	0	0	0	3	1	0	0	0	0	3	1	10	0	0	1	1
1	58	0	3	9	0	2	1	1	36.7	85	20	135	0	1	0	0	0	3	0	0	0	0	0	0	1	0	0	3	0	0	1	10	0	0	1	2
0	50	3	5	22	0	1	1	3	37	80	16	112	0	0	0	0	0	0	0	0	0	0	0	4	1	0	0	0	0	4	1	17	1	0	1	1
0	36	0	5	40	0	3	1	1	37	95	16	164	0	1	0	0	0	1	2	0	0	2	2	3	1	0	0	1	2	3	1	14	0	0	1	2
0	56	5	3	8	0	2	1	1	37	88	21	140	0	1	0	0	0	3	1	0	0	0	0	0	0	0	0	3	1	0	0	10	0	0	2	3
1	54	5	2	34	0	24	1	3	37.2	67	12	135	0	0	4	0	0	0	0	0	0	0	0	0	1	4	0	0	0	0	1	17	1	0	0	0
0	60	5	3	18	0	72	1	1	37	88	21	140	0	1	0	0	0	3	1	0	0	0	0	0	0	0	0	3	1	0	0	10	0	0	2	3
0	47	0	2	95	0	2	1	3	37.2	75	12	135	1	1	5	0	2	1	0	2	2	2	2	0	1	5	0	2	2	2	1	33	1	0	1	2
0	71	4	6	1	0	1	1	2	37.7	95	25	164	1	1	0	0	0	0	0	0	0	0	0	0	5	0	0	0	0	0	5	25	1	0	3	4
1	62	0	2	11	0	1	1	3	36.8	80	20	110	0	0	2	2	1	0	0	5	0	0	0	0	1	5	2	0	0	0	1	30	1	0	1	1
0	47	1	3	6	0	24	1	1	37	88	21	140	0	1	0	1	0	3	0	0	0	0	0	0	0	0	1	3	0	0	0	10	0	0	2	3
0	30	0	2	1	0	1	1	2	36.8	95	25	164	2	1	4	2	0	2	0	0	0	0	0	0	0	4	2	2	0	0	0	24	1	0	4	5
0	38	3	1	32	3	2	3	1	36	125	22	80	0	0	0	4	1	0	0	0	0	0	0	0	0	1	4	0	0	0	0	17	1	0	6	6
0	25	6	2	13	0	0.5	1	3	36.8	96	20	126	1	0	3	2	0	0	0	0	0	0	0	0	0	3	2	0	0	0	0	13	0	0	2	2
0	52	2	3	19	0	3	1	1	37	88	21	140	0	1	0	0	0	3	2	0	2	0	0	0	0	0	0	3	2	0	0	13	0	0	2	3
0	63	0	3	11	0	5	1	1	37	88	21	140	0	1	0	0	0	2	0	0	0	0	2	0	0	0	0	2	0	2	0	8	0	0	2	3
1	48	0	3	20	0	3	1	1	36.8	85	20	120	0	1	0	0	0	3	0	0	0	0	2	0	0	0	0	3	0	2	0	13	0	0	1	2
1	79	5	2	5	0	2	1	1	37.3	72	11	140	0	0	3	1	0	0	0	0	0	0	0	0	0	3	1	0	0	0	0	10	0	0	0	0
0	80	5	2	9	0	48	1	3	37	70	15	120	0	0	3	1	0	0	0	0	0	0	0	0	0	3	1	0	0	0	0	10	0	0	1	1
1	25	0	2	3	0	2	3	2	36.7	65	15	104	0	0	2	1	1	1	0	5	0	0	0	0	0	5	1	1	0	0	0	27	1	0	1	1
1	87	5	2	11	0	4	1	3	36.9	76	18	169	0	0	3	1	0	0	0	0	0	0	0	0	0	3	1	0	0	0	0	10	0	0	1	1
0	62	5	3	15	0	10	1	1	37	78	20	120	0	1	0	0	0	3	2	0	0	0	0	0	1	0	0	3	2	0	1	14	0	0	1	2
1	64	0	5	1	1	3	3	0	36	116	31	77	3	2	3	0	0	3	3	0	0	0	0	4	0	3	0	3	3	4	0	34	1	1	10	12
1	37	0	3	49	0	2	1	1	36.7	72	18	127	0	1	0	0	0	3	0	2	2	0	2	0	0	2	0	3	0	2	0	17	1	0	1	2
1	58	0	3	9	0	24	1	1	36.8	76	20	125	0	1	0	0	0	2	0	0	0	0	0	0	0	0	0	2	0	0	0	4	0	0	1	2
1	74	5	2	27	0	2	1	3	36.2	64	16	115	0	2	3	1	0	0	0	0	0	0	0	0	0	3	1	0	0	0	0	10	0	0	1	3
0	40	0	3	12	0	2	1	1	37	78	21	140	0	1	0	0	0	2	0	0	0	0	2	0	0	0	0	2	0	2	0	8	0	0	2	3
0	60	5	3	10	0	6	1	1	37	88	21	140	0	1	0	0	0	3	0	0	0	0	2	0	0	0	0	3	0	2	0	13	0	0	2	3
1	81	5	2	22	0	2	1	3	37	76	20	180	0	0	3	0	0	0	0	0	0	0	2	0	0	3	0	0	0	2	0	13	0	0	1	1
0	37	2	3	14	0	4	1	1	37	88	21	140	0	1	0	0	2	3	0	0	0	0	0	0	0	2	0	3	0	0	0	13	0	0	2	3
1	57	0	2	4	0	3	3	0	36	133	21	100	3	1	5	0	0	1	0	0	0	0	0	2	1	5	0	1	0	2	1	30	1	1	9	10
0	41	2	3	4	0	4	1	1	37	88	21	140	0	1	0	0	0	3	1	0	0	0	0	0	0	0	0	3	1	0	0	10	0	0	2	3
0	40	0	2	23	0	2	1	1	37	93	12	128	1	0	3	0	0	0	0	0	0	0	0	0	1	3	0	0	0	0	1	10	0	0	1	1
0	59	0	3	13	0	6	1	1	37	88	21	140	0	1	0	0	0	3	0	0	0	0	0	0	1	0	0	3	0	0	1	10	0	0	2	3
0	52	0	3	17	0	2	1	1	37	88	21	140	0	1	0	0	0	3	0	0	0	0	0	0	1	0	0	3	0	0	1	10	0	0	2	3
1	63	0	2	41	0	1	1	3	37.3	50	10	143	2	0	4	0	0	0	0	0	0	0	0	0	1	4	0	0	0	0	1	17	1	0	3	3
1	72	0	3	3	0	5	1	1	36.8	85	20	120	0	1	0	0	0	3	0	0	0	0	0	2	0	0	0	3	0	2	0	13	0	0	1	2
0	45	1	2	30	0	2	1	3	37.1	96	18	105	0	1	5	2	0	3	0	0	0	0	2	3	1	5	2	3	0	3	1	43	1	0	1	2
1	65	0	3	10	0	2	1	1	36.8	76	20	125	0	1	0	0	0	3	0	0	0	0	2	2	0	0	0	3	0	2	0	13	0	0	1	2
1	56	5	3	9	0	24	1	1	36.8	76	20	125	0	1	0	0	0	3	0	0	0	0	0	0	1	0	0	3	0	0	1	10	0	0	1	2
1	42	0	3	16	0	4	1	1	36.8	76	20	125	0	1	2	0	0	3	0	0	0	0	0	0	0	2	0	3	0	0	0	13	0	0	1	2
1	56	5	3	3	0	1	1	1	36.8	76	20	125	0	1	0	0	0	2	0	0	0	0	0	0	1	0	0	2	0	0	1	5	0	0	1	2
0	22	0	2	17	0	12	3	3	37	75	20	125	2	1	4	2	0	4	0	0	2	0	2	2	1	4	2	4	0	2	1	36	1	0	3	4
1	75	0	3	19	0	2	1	1	36.7	85	20	135	0	1	1	0	0	2	0	0	0	0	0	0	0	1	0	2	0	0	0	5	0	0	1	2
0	71	5	3	12	0	8	1	1	37	78	20	120	0	1	0	0	0	3	0	0	0	0	0	0	1	0	0	3	0	0	1	10	0	0	1	2
0	81	0	3	26	0	6	1	3	37	78	21	140	0	1	1	0	0	3	0	0	0	0	2	0	0	1	0	3	0	2	0	14	0	0	2	3
0	37	0	2	11	0	1	1	3	37.3	87	12	125	0	0	3	2	0	0	0	0	0	0	0	0	1	3	2	0	0	0	1	14	0	0	0	0
0	34	0	3	9	0	1	1	1	37	88	21	130	0	1	0	0	0	3	0	0	0	0	0	3	0	0	0	3	0	3	0	18	1	0	2	3
0	59	1	3	9	0	11	1	3	37	78	21	140	0	1	0	0	0	3	1	0	0	0	0	0	0	0	0	3	1	0	0	10	0	0	2	3
0	75	5	3	6	0	72	3	1	37	88	21	140	0	1	0	0	0	3	1	0	0	0	0	0	0	0	0	3	1	0	0	10	0	0	2	3
0	26	0	4	13	7	2	3	1	36.5	76	21	129	0	1	0	0	0	0	4	0	0	0	0	0	1	0	0	0	4	0	1	17	1	0	2	3
0	55	0	2	15	0	24	3	3	38	80	20	135	0	1	3	0	0	1	0	0	0	0	0	0	1	3	0	1	0	0	1	11	0	0	1	2
0	51	0	3	8	0	4	1	1	37	88	21	200	0	1	0	0	0	3	0	0	0	0	0	0	1	0	0	3	0	0	1	10	0	0	4	5
